# Supplementary material for: Integrative comparison of the genomic and transcriptomic landscape between prostate cancer patients of predominantly African or European genetic ancestry
Source: PLoS Genet. 2020 Feb 14;16(2):e1008641. doi: 10.1371/journal.pgen.1008641 (PMC7046294; doi:10.1371/journal.pgen.1008641)
Supplement: S8 Table — (XLSX) [file pgen.1008641.s011.xlsx]

## Sheet: Table S8
Table S8. Differences in fusion event frequency between AA and EA patients
Fusion	Alteration Proportion	Differentially Altered (adjusting for age and Gleason score)
	(Overall)	z value	p value	FDR
ERG--TMPRSS2	0.383838	-2.01647	0.0437508	0.175003
ERG--SLC45A3	0.0242424	-0.340221	0.73369	0.978254
ETV4--TMPRSS2	0.0161616	0.373798	0.708555	0.978254
ETV1--SLC45A3	0.0141414	-0.0110355	0.991195	0.991195
