# Supplementary material for: Integrative comparison of the genomic and transcriptomic landscape between prostate cancer patients of predominantly African or European genetic ancestry
Source: PLoS Genet. 2020 Feb 14;16(2):e1008641. doi: 10.1371/journal.pgen.1008641 (PMC7046294; doi:10.1371/journal.pgen.1008641)
Supplement: S13 Table — (XLSX) [file pgen.1008641.s016.xlsx]

## Sheet: Table S13
Table S13. LncRNA genes differentially expressed between AA and EA patients identified by DESeq2 analysis adjusting for clinical factors
Gene ID (GENCODE v22)
	Gene symbol	effect size	p value	adj p value	Classification	Cytoplasmic/Nuclear Relative Concentration Index (CN-RCI)	Regulatory
ENSG00000082929.7	LINC01587	0.867887	3.55163e-05	0.00144455	Intergenic	1.23491
ENSG00000116652.6	DLEU2L	0.392637	0.00517843	0.0512969	Exonic	-2.98664
ENSG00000122548.5	KIAA0087	-0.585687	0.0123635	0.0892112	Intergenic	NA
ENSG00000128254.12	C22orf24	0.549502	0.000345196	0.00810969	Antisense	-0.135728
ENSG00000132204.12	LINC00470	0.61097	0.0112244	0.0838748	Intergenic	-2.05889	Y
ENSG00000142396.9	ERVK3-1	0.204841	0.000330394	0.00787171	Exonic	-0.971168	Y
ENSG00000151303.11	RP11-96C23.13	0.596665	2.08147e-05	0.000955556	Intergenic	-2.21648
ENSG00000157306.13	RP11-66N24.4	0.44547	0.000577107	0.0115766	Exonic	-3.95175	Y
ENSG00000162947.4	AC007364.1	-0.704553	0.00605671	0.0567871	Intergenic	NA	N
ENSG00000165511.6	C10orf25	-0.244318	0.000908129	0.0158253	Antisense	0.649078
ENSG00000167117.7	LINC00483	0.49125	0.0147168	0.0997293	Intergenic	1.58496	Y
ENSG00000170919.14	TPT1-AS1	0.299379	0.000407727	0.00913521	Antisense	-2.13559	Y
ENSG00000172250.13	SERHL	0.552936	0.000519651	0.0108526	Antisense	-2.18785	Y
ENSG00000173867.8	RP11-97O12.7	0.418665	5.46043e-05	0.00200632	Exonic	NA	Y
ENSG00000174171.5	RP11-23P13.6	0.735272	0.000175287	0.00487934	Antisense	-3.38244	Y
ENSG00000175147.10	TMEM51-AS1	0.388017	0.00145992	0.0220063	Antisense	-1.90071	Y
ENSG00000175746.6	C15orf54	0.561781	0.00972665	0.0762895	Intergenic	1.04176
ENSG00000175772.10	LINC01106	-0.419049	9.46932e-05	0.00302725	Intergenic	-0.468712
ENSG00000176236.6	C10orf111	0.368854	0.00144231	0.0218389	Antisense	-2.09267
ENSG00000176593.6	CTD-2368P22.1	0.365674	0.000721112	0.0135568	Antisense	-2.40522
ENSG00000176659.7	C20orf197	0.424093	0.00645228	0.0591292	Intergenic	-2.0793
ENSG00000177112.6	MRVI1-AS1	-0.585373	0.000147878	0.00427892	Antisense	-0.694523	Y
ENSG00000177410.11	ZFAS1	0.252969	0.0132144	0.0929876	Antisense	1.42944	Y
ENSG00000178193.5	RP4-682C21.5	0.668369	0.00293886	0.0353313	Intergenic	NA	N
ENSG00000178248.11	AP000345.1	-0.638786	0.00151625	0.0226257	Intergenic	NA	Y
ENSG00000179141.8	MTUS2-AS1	0.598222	0.00660232	0.0598424	Antisense	-1.22239	N
ENSG00000179428.2	AC073072.5	-0.656068	0.00198548	0.0272671	Antisense	0.294825
ENSG00000180846.7	CSNK1G2-AS1	0.588074	0.00208767	0.0281618	Antisense	NA	Y
ENSG00000181800.5	CELF2-AS1	0.479667	0.0105386	0.0804808	Antisense	NA	Y
ENSG00000182109.6	RP11-69E11.4	0.383913	0.00174853	0.0249226	Antisense	-4.3492	Y
ENSG00000182366.8	FAM87A	-1.27565	1.17911e-09	2.04855e-07	Intergenic	-1.16674	Y
ENSG00000182376.2	RP5-1142A6.8	0.689515	1.4427e-05	0.00069977	Antisense	NA	Y
ENSG00000182648.10	LINC01006	-0.689156	1.14842e-09	2.00388e-07	Antisense	-0.238906	Y
ENSG00000183562.3	CTC-343N3.1	0.556248	0.00264357	0.0330094	Antisense	NA
ENSG00000185203.10	WASIR1	-1.05591	2.55146e-05	0.00110821	Intergenic	-0.584962
ENSG00000185837.3	CECR5-AS1	0.314168	0.0113109	0.0843133	Antisense	-0.389412	Y
ENSG00000186825.5	C2orf27B	0.658023	0.00938072	0.0746071	Intergenic	-3.82443
ENSG00000188206.6	HNRNPU-AS1	0.498468	1.63397e-05	0.00078219	Exonic	-3.97636	Y
ENSG00000188525.3	AC010969.1	-0.691649	0.00684085	0.0611927	Intergenic	NA	N
ENSG00000189238.5	LINC00943	0.657521	0.000832043	0.0149586	Intergenic	NA	Y
ENSG00000189316.3	RP11-797H7.5	0.471178	0.0145831	0.0991235	Antisense	0.072195
ENSG00000196096.3	AC079610.2	0.786145	2.48672e-06	0.000167893	Intergenic	-0.152003
ENSG00000196295.10	AC005154.6	0.319661	0.000574074	0.0115291	Exonic	-2.40984	Y
ENSG00000196421.6	LINC00176	0.407966	0.0064365	0.0590743	Antisense	-3.01274	Y
ENSG00000196756.10	SNHG17	0.436122	2.20432e-05	0.000997187	Intergenic	-1.24819	Y
ENSG00000196979.1	RP11-88G17.6	0.560811	0.00460468	0.0476359	Intergenic	NA
ENSG00000197989.12	SNHG12	0.422661	0.000580629	0.0116319	Antisense	-2.15987	Y
ENSG00000198454.2	PRR31	0.767276	0.000273328	0.00683016	Intergenic	NA
ENSG00000198468.6	FLVCR1-AS1	-0.492213	1.30467e-05	0.000643429	Intergenic	1.28341	Y
ENSG00000203279.3	RP11-498P14.5	0.737577	8.04544e-08	9.05831e-06	Intergenic	0.524866	Y
ENSG00000203280.4	CTA-221G9.12	0.352115	0.00402598	0.0437045	Antisense	1.66297
ENSG00000203321.2	C9orf41-AS1	0.418367	0.0093252	0.0744004	Antisense	NA
ENSG00000203364.2	RP11-370F5.4	0.522835	0.00326173	0.0380802	Intergenic	NA	Y
ENSG00000203588.3	IGBP1-AS1	0.390521	0.00544084	0.0530617	Antisense	NA	Y
ENSG00000203644.3	RP11-332M2.1	0.260711	0.00375666	0.0416789	Intronic	1.05269
ENSG00000203688.4	RP11-351J23.1	-0.589339	0.0016105	0.0236143	Intergenic	-0.5	Y
ENSG00000203739.3	RP11-296O14.3	0.415879	7.77467e-07	6.28003e-05	Intergenic	-1.29908	Y
ENSG00000203804.4	ADAMTSL4-AS1	0.464396	0.00471175	0.0482757	Exonic	-2.54428
ENSG00000203865.8	ATP1A1-AS1	0.274442	5.6014e-06	0.000323461	Antisense	0.349769
ENSG00000203875.9	SNHG5	-0.308118	0.0124899	0.0898462	Intergenic	2.04928	Y
ENSG00000203999.7	LINC01270	0.448196	0.0048447	0.0490889	Intergenic	-1.91247
ENSG00000204091.6	TDRG1	0.885294	0.000544539	0.0111444	Intergenic	0.14401	N
ENSG00000204110.6	RP1-153P14.8	0.684846	0.00369528	0.0412364	Intergenic	2.64386	N
ENSG00000204261.7	PSMB8-AS1	0.446203	8.01794e-05	0.00268421	Exonic	0.377915
ENSG00000204283.3	FLJ45079	0.577443	0.00592189	0.0559133	Intergenic	NA
ENSG00000204588.5	LINC01123	0.599517	9.34796e-08	1.03798e-05	Intergenic	-1.25606
ENSG00000204625.9	HCG9	0.762974	1.17339e-07	1.2646e-05	Intergenic	NA	Y
ENSG00000204709.4	LINC01556	1.08131	5.2515e-10	1.00058e-07	Intergenic	NA
ENSG00000204758.6	CTC-308K20.1	0.285736	0.00198308	0.0272434	Antisense	-1.48129	Y
ENSG00000204802.3	RP11-111F5.4	0.835285	1.30579e-05	0.000643429	Intergenic	-1.58037	Y
ENSG00000204949.7	FAM83A-AS1	1.38953	1.59355e-08	2.19931e-06	Antisense	-1.58496	Y
ENSG00000205037.2	RP11-863P13.4	-0.72069	0.000656205	0.0126796	Antisense	NA	Y
ENSG00000205325.1	AC005863.1	0.682326	0.00117001	0.0189472	Intergenic	0.328054	Y
ENSG00000205559.3	CHKB-AS1	0.341229	0.00169362	0.0244327	Antisense	0.509282	Y
ENSG00000205622.8	AF064858.6	0.621187	0.00119655	0.0192581	Intergenic	-1.26303	Y
ENSG00000205632.2	LINC01310	-0.978334	8.25835e-05	0.00273741	Intergenic	-2.83008
ENSG00000205663.5	RP11-706O15.5	-0.670566	0.00870659	0.0713846	Intergenic	-0.498226	Y
ENSG00000205664.9	RP11-706O15.1	-0.211116	0.0133849	0.0938493	Intergenic	-0.138456
ENSG00000205740.2	RP11-363N22.3	0.31696	0.0102657	0.0790709	Antisense	-1.64823
ENSG00000205837.6	LINC00487	0.698415	0.00258209	0.0325143	Intergenic	-1.58496	Y
ENSG00000205885.6	C1RL-AS1	0.270546	0.0124679	0.0897718	Antisense	-3.63717	Y
ENSG00000205890.3	RP11-473M20.5	0.327279	0.0059715	0.0562631	Antisense	NA	Y
ENSG00000205913.5	SRRM2-AS1	0.405065	0.000240383	0.00619073	Antisense	-1.59899	Y
ENSG00000206140.8	TMEM191C	0.35579	0.00618357	0.0575881	Intergenic	-2.25136	N
ENSG00000206337.9	HCP5	0.423153	0.00279217	0.0341663	Exonic	-0.161865	Y
ENSG00000206417.7	H1FX-AS1	0.391371	0.00111415	0.0183749	Antisense	-2.2493	Y
ENSG00000206573.7	THUMPD3-AS1	0.276083	0.000767012	0.0141946	Antisense	-1.04713
ENSG00000211683.3	KB-1572G7.3	0.627143	0.00016719	0.00469613	Exonic	-2.29319	Y
ENSG00000213373.6	LINC00671	1.3489	1.03955e-13	3.77487e-11	Intergenic	-3.36602	Y
ENSG00000213742.5	ZNF337-AS1	0.20903	0.0022273	0.0293866	Antisense	-1.1948
ENSG00000213971.6	RP11-15H20.6	0.211628	0.0003165	0.00760714	Intergenic	-0.522292	Y
ENSG00000214188.8	ST7-OT4	0.37724	0.0142496	0.097894	Exonic	-2.38729
ENSG00000214401.4	KANSL1-AS1	-0.675873	3.92599e-06	0.000243157	Antisense	1.67916	Y
ENSG00000214559.3	RP11-323J4.1	-0.764856	4.85457e-06	0.000290747	Antisense	NA	Y
ENSG00000214770.2	RP11-544I20.2	0.377853	0.00321041	0.0376717	Exonic	-1.60163	Y
ENSG00000214783.8	POLR2J4	0.381479	2.29433e-05	0.0010246	Antisense	-1.50391
ENSG00000214894.5	LINC00243	0.528981	0.000268215	0.00673578	Intergenic	-1.68716	Y
ENSG00000215022.6	RP1-257A7.4	0.308583	0.00266099	0.0331653	Exonic	-2.48635	Y
ENSG00000215023.2	AC114730.5	0.605703	0.00278137	0.034117	Antisense	-1.70895	Y
ENSG00000215190.7	LINC00680	0.401345	2.29133e-06	0.000157605	Intergenic	-0.670494	Y
ENSG00000215196.4	AC091878.1	0.57372	0.00302549	0.0360367	Antisense	-1.50129	Y
ENSG00000215256.3	DHRS4-AS1	-0.373849	1.02927e-09	1.82761e-07	Antisense	1.56517	Y
ENSG00000215374.5	FAM66B	-0.73761	4.81552e-09	7.5525e-07	Antisense	-0.369427	Y
ENSG00000215386.9	MIR99AHG	0.507435	4.67129e-05	0.0017847	Intergenic	-0.0688098
ENSG00000215424.8	MCM3AP-AS1	0.304306	0.000212866	0.00563361	Antisense	-1.46568	Y
ENSG00000215769.7	RP13-104F24.2	0.406806	0.000444656	0.0097037	Intergenic	-3.91999
ENSG00000215859.7	RP6-74O6.2	0.365014	0.00177369	0.0251531	Intergenic	-1.0069	N
ENSG00000215908.6	CROCCP2	0.595445	5.04615e-12	1.46327e-09	Intergenic	NA	Y
ENSG00000216895.7	AC009403.2	0.212329	0.00627838	0.0582691	Antisense	0.67078
ENSG00000217258.2	AC007249.3	0.505592	0.000571601	0.0115025	Intergenic	NA	Y
ENSG00000217576.7	RP11-248G5.8	-0.750697	0.00265573	0.0331202	Intergenic	NA	Y
ENSG00000217702.2	RP11-287D1.4	0.497135	0.00986789	0.0770674	Intergenic	-1.38702
ENSG00000218416.4	PP14571	0.518428	0.000959156	0.0165389	Antisense	-1.25648
ENSG00000218672.1	AC008060.7	-0.928525	0.000232057	0.00602718	Intergenic	NA
ENSG00000219410.5	RP4-761J14.8	0.457911	0.000678756	0.0130132	Antisense	1	N
ENSG00000221571.3	RNU6ATAC35P	0.43068	0.00159844	0.0235415	Intergenic	NA	Y
ENSG00000222030.1	AC007131.1	0.816973	0.000544095	0.0111444	Intergenic	NA	N
ENSG00000222042.1	AP000233.4	0.751205	0.00329707	0.0383867	Intergenic	-1.05751	N
ENSG00000223396.2	RP11-134G8.5	0.236209	0.0113069	0.0843073	Intergenic	-0.67397
ENSG00000223511.4	RP13-297E16.4	0.635204	0.00169869	0.024462	Intergenic	-2.07223
ENSG00000223525.1	RABGAP1L-IT1	0.627931	0.0115287	0.0852012	Intronic	0.777608	N
ENSG00000223562.1	RP11-543B16.3	0.66532	0.00588365	0.0557174	Intergenic	NA	N
ENSG00000223675.1	RP11-86H7.6	-0.637511	0.0089873	0.0726867	Intergenic	NA	N
ENSG00000223715.1	LINC01208	0.677895	0.00581543	0.0552185	Intergenic	0.736966
ENSG00000223749.6	MIR503HG	0.416292	0.0108787	0.0821018	Intergenic	-3.61726	Y
ENSG00000223770.4	AC006145.4	0.755039	0.00239545	0.0308478	Antisense	-2
ENSG00000223783.1	AC124944.5	0.806272	5.07178e-05	0.00189989	Intergenic	NA	Y
ENSG00000223797.4	ENTPD3-AS1	0.215913	0.013453	0.0941851	Antisense	0.914147	Y
ENSG00000223834.2	RP11-472N13.2	0.633508	0.00123483	0.0196573	Intergenic	NA	Y
ENSG00000223838.1	AC007091.1	0.617562	0.0102727	0.0790949	Intergenic	NA	Y
ENSG00000223891.4	OSER1-AS1	0.218731	0.0104902	0.0802786	Intergenic	1.6135	Y
ENSG00000223901.2	AP001469.5	0.568863	0.000324772	0.0077735	Antisense	NA	N
ENSG00000223956.1	RP4-710M16.2	1.06767	7.45277e-08	8.41454e-06	Intergenic	NA	Y
ENSG00000224050.1	RP1-90G24.6	-0.561425	0.00950372	0.0751392	Intergenic	-0.833431	Y
ENSG00000224057.1	EGFR-AS1	0.633234	2.46456e-05	0.00107743	Antisense	1.16155	N
ENSG00000224066.1	RP4-622L5.7	0.495095	0.000404313	0.00907676	Antisense	-4.60775
ENSG00000224081.6	LINC01057	-0.4582	0.00188703	0.0263368	Intergenic	NA	Y
ENSG00000224090.1	AC097468.4	-0.421579	0.000286599	0.00706293	Antisense	-1.43723	Y
ENSG00000224093.4	RP5-1033H22.2	0.563556	0.003571	0.0402957	Antisense	-1.02013	Y
ENSG00000224100.1	AP001630.5	0.583578	0.00113416	0.0186217	Intergenic	NA	Y
ENSG00000224138.1	AC000123.4	0.194668	0.0123569	0.0891798	Antisense	NA	Y
ENSG00000224141.4	AL109763.2	1.1018	3.48329e-07	3.19093e-05	Intergenic	-1.13791	N
ENSG00000224152.1	AC009506.1	-0.237497	0.000746871	0.0139226	Antisense	0.630191
ENSG00000224189.5	HAGLR	-0.497332	0.0112138	0.0838266	Antisense	0.501454
ENSG00000224272.2	AC114730.3	0.623781	0.000465655	0.0100724	Antisense	0.13363	N
ENSG00000224356.4	RP11-151A6.4	0.926392	1.30014e-12	4.0624e-10	Exonic	-2.48652	Y
ENSG00000224387.1	RP3-395M20.2	0.528068	0.0041773	0.0447191	Antisense	NA	Y
ENSG00000224413.1	AP001476.2	1.16535	9.25302e-08	1.03313e-05	Intergenic	-2.32297	Y
ENSG00000224418.1	STK24-AS1	0.395537	0.00248013	0.031645	Antisense	-1.6895	N
ENSG00000224505.2	AC002117.1	0.31988	0.0120642	0.0877271	Antisense	-2.50616	Y
ENSG00000224521.1	RP11-438F14.3	0.750666	0.00303009	0.0360596	Antisense	-0.769654	Y
ENSG00000224536.1	RP11-134G8.7	0.455891	2.59311e-05	0.00112267	Antisense	-0.906522	Y
ENSG00000224549.1	RP11-370B11.3	0.577364	0.00907895	0.0732261	Intergenic	NA	Y
ENSG00000224596.6	ZMIZ1-AS1	0.533891	1.42214e-07	1.49276e-05	Intergenic	-2.38894	Y
ENSG00000224614.1	TNK2-AS1	0.745046	2.35859e-06	0.000161132	Antisense	-1.37742	Y
ENSG00000224635.1	RP4-564F22.5	0.913524	1.04105e-08	1.50401e-06	Intergenic	-3.21932	Y
ENSG00000224652.1	LINC00885	0.540821	0.000464969	0.0100653	Intergenic	0.176299	Y
ENSG00000224660.1	SH3BP5-AS1	0.533139	2.32636e-06	0.00015947	Antisense	-3.97705	Y
ENSG00000224794.1	RP3-333H23.8	0.708323	0.00251745	0.0320097	Intergenic	-2.03623	Y
ENSG00000224897.5	POT1-AS1	0.498761	0.000254493	0.00644202	Antisense	-0.436755
ENSG00000224903.1	AC005534.8	0.612137	1.57628e-05	0.000760898	Antisense	-2.18461
ENSG00000224934.2	RP11-441O15.3	0.349176	0.00279007	0.0341614	Intergenic	-2.32696	Y
ENSG00000224945.1	RP11-82L18.2	0.52401	0.00113748	0.0186451	Intronic	-3.27869	Y
ENSG00000224969.1	RP11-54O7.11	0.436117	0.0113459	0.0843586	Antisense	NA	Y
ENSG00000224975.1	INE1	0.310308	0.0031304	0.0369155	Intronic	-5.00238	Y
ENSG00000225032.4	RP11-228B15.4	0.334856	0.00867249	0.0712229	Antisense	-4.74267	Y
ENSG00000225039.1	LINC01058	0.389827	0.0132845	0.0933995	Intergenic	-1	Y
ENSG00000225062.1	CATIP-AS1	0.390283	0.00817023	0.0685793	Antisense	-0.451352
ENSG00000225075.1	RP11-426L16.3	0.640104	3.41383e-05	0.00140266	Antisense	NA	Y
ENSG00000225077.2	LINC00337	0.686054	4.46608e-05	0.00172427	Intergenic	0.337253	Y
ENSG00000225084.1	AL450226.2	0.720491	0.00401164	0.0436076	Antisense	NA	N
ENSG00000225146.1	AC073957.15	0.701805	3.4637e-05	0.0014145	Antisense	NA	Y
ENSG00000225173.1	XXbac-BPG308K3.5	0.501071	0.0127186	0.0908	Intergenic	0.626892	Y
ENSG00000225177.4	RP11-390P2.4	0.38582	0.0031262	0.0368983	Antisense	-1.87188	Y
ENSG00000225231.1	AC091814.2	0.791608	0.00175139	0.0249358	Intergenic	NA	N
ENSG00000225243.4	RP1-127D3.4	0.702533	0.00155928	0.0231236	Antisense	NA	Y
ENSG00000225279.1	RP11-536C5.2	0.852962	2.91919e-06	0.000191012	Antisense	NA	Y
ENSG00000225328.1	AC019100.3	0.607311	0.00249921	0.0318526	Intergenic	NA	Y
ENSG00000225331.1	AP001055.6	0.841392	6.57393e-07	5.4747e-05	Intergenic	NA	Y
ENSG00000225339.3	RP11-513I15.6	0.370256	0.000665365	0.0128277	Antisense	-1.12726
ENSG00000225361.3	PPP1R26-AS1	0.273924	0.000995301	0.0169559	Antisense	-1.87477	Y
ENSG00000225383.5	SFTA1P	0.836724	0.000943961	0.0163504	Intergenic	1.0711	N
ENSG00000225391.4	NHEG1	-0.713926	0.00456856	0.0474503	Intergenic	NA
ENSG00000225442.2	MPRIP-AS1	0.8614	6.31877e-06	0.000360203	Antisense	NA	Y
ENSG00000225465.8	RFPL1S	-0.88307	2.34675e-06	0.000160595	Antisense	-0.361965	Y
ENSG00000225498.1	AC002064.5	0.479251	0.012842	0.0913559	Intergenic	NA	Y
ENSG00000225528.1	RP3-370M22.8	0.443109	0.0016071	0.0235904	Intronic	NA	Y
ENSG00000225578.1	NCBP2-AS1	0.432998	0.00347297	0.0395597	Antisense	NA	Y
ENSG00000225598.1	RP11-339D23.1	0.808351	0.000423591	0.00935543	Intergenic	1.24286	Y
ENSG00000225708.5	RP13-379L11.1	-0.973462	2.46152e-05	0.00107743	Intergenic	NA	Y
ENSG00000225725.4	FAM66E	1.08819	3.15974e-10	6.36798e-08	Antisense	-0.512767	Y
ENSG00000225731.1	AP001627.1	-0.603318	0.00205434	0.0278897	Antisense	NA	Y
ENSG00000225783.5	MIAT	0.438539	0.00973739	0.0763441	Intergenic	-2.90388	Y
ENSG00000225819.1	AC013269.3	0.764015	0.000712735	0.0134621	Antisense	NA	Y
ENSG00000225855.5	RUSC1-AS1	0.282141	0.00870883	0.0713846	Antisense	-4.07582
ENSG00000225880.5	LINC00115	0.486059	2.36684e-05	0.00104835	Intergenic	-1.84265	Y
ENSG00000225905.1	RP4-758J18.7	-0.563961	7.52746e-07	6.10481e-05	Antisense	-0.110183	Y
ENSG00000225916.1	AC007879.4	0.487584	0.00940786	0.074705	Intergenic	NA	Y
ENSG00000225942.1	AC093326.2	0.876735	0.000232073	0.00602718	Intergenic	NA	N
ENSG00000225953.2	SATB2-AS1	-0.335492	0.00659379	0.0598424	Antisense	0.534336	Y
ENSG00000225969.1	ABHD11-AS1	-0.410164	0.0131405	0.0927614	Intergenic	1.40642
ENSG00000225988.1	LAMP5-AS1	-0.911565	0.000267698	0.00672699	Antisense	-2.22239
ENSG00000226155.1	AC124944.3	0.646714	4.61989e-05	0.00177178	Intergenic	NA	Y
ENSG00000226263.1	ISM1-AS1	0.440856	0.0146854	0.0996005	Antisense	NA	Y
ENSG00000226312.6	CFLAR-AS1	0.338766	0.00761296	0.0655114	Antisense	-2.89592	Y
ENSG00000226328.5	NUP50-AS1	0.408272	2.78675e-06	0.000184442	Intergenic	-0.413022
ENSG00000226332.2	RP11-157P1.4	0.351417	0.00700833	0.0620749	Antisense	-3.07619	Y
ENSG00000226398.1	AC013480.2	-0.817497	0.0010906	0.0180945	Intergenic	NA	N
ENSG00000226416.1	MRPL23-AS1	0.479198	0.0133337	0.093631	Antisense	-1.03037	Y
ENSG00000226431.1	RP11-416N2.3	0.613247	0.0144919	0.0987646	Intronic	2.35364	N
ENSG00000226440.6	RP11-506B6.6	-0.462157	0.00363623	0.0408209	Exonic	NA	N
ENSG00000226472.6	RP11-551L14.4	0.428365	0.00710056	0.0625306	Antisense	-2.74819	Y
ENSG00000226508.1	AC104655.3	0.777035	0.000178179	0.00493259	Intergenic	0.0769615	Y
ENSG00000226519.1	LINC00390	-0.624576	0.0138722	0.0961887	Intergenic	NA	N
ENSG00000226644.4	RP11-128M1.1	0.359291	0.0134003	0.0939021	Intergenic	2.68653
ENSG00000226686.6	LINC01535	-0.587347	8.13459e-05	0.00270306	Intergenic	-1.97634
ENSG00000226706.1	RP11-426A6.5	0.355078	0.01158	0.0854236	Antisense	NA	N
ENSG00000226725.2	PABPC1L2B-AS1	-0.654367	0.00101856	0.017261	Intergenic	0.137504
ENSG00000226747.5	AC007966.1	0.597635	0.000962416	0.0165637	Antisense	NA	Y
ENSG00000226752.6	PSMD5-AS1	0.55111	5.431e-10	1.01122e-07	Antisense	-0.618668	Y
ENSG00000226754.1	RP5-1024G6.5	-0.384151	7.42845e-06	0.000412422	Antisense	1.35183	Y
ENSG00000226756.1	AC007365.3	-0.437109	0.00949207	0.0751074	Antisense	-0.117836	Y
ENSG00000226757.2	PP12613	0.826959	0.00121022	0.0194035	Antisense	-1.75966
ENSG00000226824.5	RP4-756H11.3	0.297715	0.00686736	0.0613307	Intronic	0.544465	Y
ENSG00000226835.1	RP11-148B18.3	0.840794	7.73862e-06	0.000425383	Intergenic	NA	Y
ENSG00000226849.1	RP4-635E18.7	0.359182	0.00683498	0.0611673	Antisense	-2.66
ENSG00000226856.4	AC093901.1	-0.551848	0.000315451	0.00758711	Intergenic	0.163499	Y
ENSG00000226864.1	ATE1-AS1	0.571479	0.000313147	0.00754454	Antisense	-1.09319
ENSG00000226913.1	BSN-AS2	0.471742	0.00420854	0.0449453	Intergenic	0.222008	Y
ENSG00000226944.1	RP1-120G22.11	0.637829	2.06806e-05	0.000951566	Antisense	1.92683	Y
ENSG00000226957.1	RP4-533D7.4	0.481562	0.00657099	0.0597197	Antisense	NA	Y
ENSG00000227028.5	SLC8A1-AS1	0.696149	0.000136477	0.00401533	Antisense	NA	Y
ENSG00000227039.5	ITGB2-AS1	0.606642	0.000255144	0.00645174	Antisense	-3.55859	Y
ENSG00000227060.5	LINC00629	0.482127	0.011746	0.0861905	Intergenic	0.78615	Y
ENSG00000227116.1	RP3-471C18.1	0.567645	0.01239	0.0893549	Intergenic	NA	Y
ENSG00000227121.1	RP11-319F12.2	-0.908016	0.000386559	0.00878299	Intergenic	0.192645	N
ENSG00000227192.1	RP1-45I4.3	0.324437	0.0087802	0.0716418	Intergenic	NA	Y
ENSG00000227258.4	SMIM2-AS1	0.368678	0.011912	0.0871093	Antisense	1.51639	Y
ENSG00000227301.1	RP11-384P7.5	0.727909	0.00237985	0.0307523	Intergenic	-1.41504	N
ENSG00000227308.2	AC009502.4	0.722729	0.00325219	0.0380401	Intergenic	-2.27055	N
ENSG00000227359.1	AC017074.2	-0.804	3.91181e-05	0.00156577	Intergenic	-0.678072	Y
ENSG00000227398.3	KIF9-AS1	0.192056	0.0126046	0.0902705	Antisense	-1.33651	Y
ENSG00000227467.3	LINC01537	-0.363508	0.0133722	0.0937943	Intergenic	0.200616
ENSG00000227492.1	RP11-316M21.6	0.41339	0.000151435	0.00433822	Antisense	-0.26526	Y
ENSG00000227495.1	AC109333.10	0.339011	0.0117643	0.0862768	Antisense	-1.2259	Y
ENSG00000227518.3	XXyac-YRM2039.3	0.564811	0.00459391	0.0475969	Antisense	-2.62922
ENSG00000227543.4	SPAG5-AS1	0.220942	0.00850341	0.0703648	Antisense	-1.95818	Y
ENSG00000227603.1	RP11-165J3.6	0.3429	0.00025557	0.00645846	Intergenic	-0.0420693	Y
ENSG00000227676.3	LINC01068	-0.76645	0.000227733	0.00595669	Intergenic	-4.13876	Y
ENSG00000227698.1	AP001619.2	0.415764	0.0101663	0.0785159	Intronic	NA	Y
ENSG00000227712.1	RP11-418J17.3	0.597336	0.00521213	0.0514789	Intergenic	-0.584962	Y
ENSG00000227744.4	FLJ43879	1.74136	8.87186e-15	3.57598e-12	Intergenic	NA
ENSG00000227803.2	RP11-239H6.2	0.553046	0.00308695	0.0365381	Antisense	NA	N
ENSG00000227888.4	FAM66A	-0.474854	0.0047052	0.0482757	Intergenic	-0.57645	Y
ENSG00000227895.5	ISX-AS1	0.818339	0.000141125	0.00412333	Intergenic	NA
ENSG00000227896.2	RP11-77P6.2	0.40903	0.00129727	0.0203301	Intergenic	-1.36286	Y
ENSG00000227945.1	RP11-103C16.2	0.485212	0.00572967	0.0546886	Antisense	NA	Y
ENSG00000227953.5	LINC01341	0.578388	0.000843368	0.0150882	Intergenic	-3.46881
ENSG00000228021.6	RP11-383C5.3	0.377164	0.00225725	0.0296458	Intergenic	-0.824913	Y
ENSG00000228065.9	LINC01515	-0.396081	0.00858564	0.0708272	Intergenic	-1.10012
ENSG00000228067.1	RP11-61J19.3	0.635988	0.00625294	0.0580731	Intergenic	NA	N
ENSG00000228079.2	AC012368.1	0.532789	0.00375402	0.0416789	Intergenic	NA	Y
ENSG00000228086.1	RP5-837M10.4	0.558806	0.0015413	0.0229358	Antisense	NA	Y
ENSG00000228109.1	MFI2-AS1	0.371574	0.00641818	0.0590387	Antisense	-3.88838	Y
ENSG00000228140.1	RP3-467K16.4	0.688049	1.8074e-05	0.000856469	Intergenic	-1.20838	Y
ENSG00000228157.4	AC007952.5	0.760378	0.000548638	0.0112015	Intergenic	-0.677692
ENSG00000228172.4	RP1-317E23.3	0.188304	0.00736081	0.0640942	Antisense	-0.870127	Y
ENSG00000228201.1	AL022341.3	0.359088	0.0125246	0.0899391	Antisense	0.644573	Y
ENSG00000228265.4	RALY-AS1	0.235379	0.0107708	0.0816663	Antisense	0.938549
ENSG00000228315.10	GUSBP11	0.368585	0.00205191	0.0278754	Antisense	-3.75963	Y
ENSG00000228318.3	AP001610.5	1.03939	5.15513e-06	0.00030334	Antisense	NA	N
ENSG00000228352.2	RP11-537H15.3	0.465214	0.00072959	0.0136716	Antisense	NA	Y
ENSG00000228389.1	AC068039.4	0.398588	0.0106557	0.0811755	Intergenic	NA	Y
ENSG00000228393.3	LINC01004	0.299367	0.0126306	0.0904243	Intergenic	-2.53584	Y
ENSG00000228463.7	AP006222.2	0.369953	0.00757662	0.0652684	Intergenic	-1.32289	Y
ENSG00000228486.8	LINC01125	0.428026	0.000217105	0.00573826	Intergenic	-3.45854
ENSG00000228509.4	AC006460.2	0.703801	0.00121501	0.0194339	Antisense	NA	N
ENSG00000228526.2	RP3-510D11.1	0.48504	7.46356e-05	0.0025344	Intergenic	-4.80703	Y
ENSG00000228544.1	CCDC183-AS1	0.262552	0.00695356	0.0618367	Antisense	-2.79921
ENSG00000228549.3	RP11-108M9.3	1.65773	3.97161e-22	3.48008e-19	Intronic	0.228016
ENSG00000228569.1	AC073133.2	-0.829525	4.66384e-05	0.00178354	Intergenic	-2.67054	Y
ENSG00000228598.1	MACC1-AS1	1.55157	3.5199e-10	6.98899e-08	Antisense	0.160465	N
ENSG00000228606.1	RP11-574F21.2	0.210563	0.0115011	0.0851067	Antisense	-0.295305
ENSG00000228630.4	HOTAIR	0.608705	0.00668185	0.0602922	Antisense	-1.36533	Y
ENSG00000228634.1	RP4-534N18.2	0.648009	0.000503736	0.0106337	Antisense	NA	Y
ENSG00000228649.7	AC005682.5	0.474444	0.000180353	0.00497911	Intergenic	-2.02937	Y
ENSG00000228658.1	RP11-791O21.5	0.940498	9.35847e-06	0.000493733	Intergenic	NA	N
ENSG00000228679.1	RP4-676J13.2	0.483601	0.011619	0.0856016	Intergenic	NA	Y
ENSG00000228701.1	TNKS2-AS1	-0.600022	2.75383e-05	0.00116964	Intergenic	1.06689	Y
ENSG00000228708.1	AL109763.1	0.544676	0.000113055	0.00347591	Intronic	NA	N
ENSG00000228784.6	LINC00954	0.385498	0.00555355	0.0537448	Intergenic	-3.23585	Y
ENSG00000228791.6	THRB-AS1	0.257574	0.00696498	0.0618909	Antisense	-1.04874	Y
ENSG00000228793.1	RP1-223B1.1	0.974317	6.40053e-05	0.00225315	Intergenic	NA	Y
ENSG00000228794.7	LINC01128	-0.373006	0.000274895	0.006852	Intergenic	-0.329993
ENSG00000228798.1	AP000473.5	0.7065	1.75765e-06	0.000124728	Intergenic	-3.51129	Y
ENSG00000228812.6	LAMA5-AS1	-0.555257	0.0100499	0.0779441	Antisense	0.762775
ENSG00000228857.2	AC104653.1	-0.58295	8.58454e-05	0.00282054	Intergenic	-0.315329	Y
ENSG00000228863.7	RP11-404F10.2	0.705114	0.000409717	0.00916961	Antisense	-2.1642	Y
ENSG00000228877.2	RP11-473E2.4	0.61135	0.00534617	0.0523665	Intergenic	NA	Y
ENSG00000228906.1	RP13-216E22.4	-0.353301	0.00222888	0.0293978	Intergenic	-1.61237	Y
ENSG00000228933.6	RP11-268G12.1	0.73639	0.00396078	0.0432737	Intergenic	-3.43276	N
ENSG00000229017.5	LINC01277	0.448337	4.54017e-05	0.00174452	Intergenic	-1.58496
ENSG00000229081.1	LINC01165	0.534763	0.00493633	0.0496924	Intergenic	-2.84106
ENSG00000229180.5	GS1-124K5.11	0.200919	0.00336536	0.0388453	Intergenic	-3.07423	Y
ENSG00000229240.6	LINC00710	1.67601	4.31773e-11	1.02979e-08	Intergenic	NA	N
ENSG00000229255.1	RP11-407H12.8	1.13306	8.43733e-06	0.000452953	Intergenic	-1.2346	Y
ENSG00000229278.1	RP11-483F11.7	0.41235	0.00298702	0.035684	Intergenic	NA	Y
ENSG00000229321.1	AC008269.2	0.439981	0.00850011	0.0703648	Intergenic	NA	Y
ENSG00000229327.1	RP11-135A24.2	-0.745896	0.00363581	0.0408209	Antisense	NA	N
ENSG00000229393.1	RP3-395M20.3	0.528356	0.00581944	0.0552436	Antisense	NA	Y
ENSG00000229395.1	AC013401.1	0.645894	0.0107626	0.0816346	Intergenic	NA	N
ENSG00000229431.1	RP1-92O14.6	0.329482	0.010077	0.0780953	Antisense	NA	Y
ENSG00000229512.1	AC068580.5	0.503658	0.000209272	0.0055604	Intronic	NA	Y
ENSG00000229550.1	AC012445.1	0.606923	0.00123459	0.0196573	Intergenic	NA	Y
ENSG00000229569.1	RP11-481G8.2	0.634315	0.00559835	0.0540227	Intergenic	NA	N
ENSG00000229625.3	RP11-44N12.2	0.521683	0.0133041	0.0934718	Intergenic	NA	Y
ENSG00000229703.4	XX-CR54.1	0.710819	0.00542495	0.0529637	Intergenic	NA	N
ENSG00000229727.5	AC013460.1	0.848172	7.99155e-06	0.00043588	Intergenic	-2	Y
ENSG00000229780.1	UBE2Q1-AS1	0.693129	1.82372e-05	0.000858744	Antisense	NA	Y
ENSG00000229848.1	RP13-766D20.2	0.311978	0.00654318	0.0596418	Antisense	-2.12249	Y
ENSG00000229854.1	RP11-524G24.2	0.47527	0.0109574	0.0824606	Antisense	NA	Y
ENSG00000229867.1	STEAP3-AS1	0.374973	0.00243141	0.0312409	Antisense	-1.53804	Y
ENSG00000229873.1	OGFR-AS1	0.470946	2.32645e-05	0.00103387	Antisense	-1.44139	Y
ENSG00000229896.2	RP11-456H18.2	0.780442	3.08939e-06	0.000200522	Exonic	-0.869441	Y
ENSG00000229913.1	RP11-378I13.1	0.612121	0.00421463	0.0449772	Intergenic	NA	Y
ENSG00000229915.1	AC016999.2	0.496263	0.00184979	0.0259262	Antisense	-1.93552	N
ENSG00000229921.5	KIF25-AS1	-0.677296	0.00697641	0.0619537	Antisense	-0.417229	N
ENSG00000229928.1	LINC00400	0.995734	3.71807e-11	9.08268e-09	Intergenic	NA	N
ENSG00000229986.1	AP001042.1	1.27067	1.31683e-07	1.39311e-05	Intergenic	NA	N
ENSG00000229990.3	RP11-574K11.8	0.698044	0.0032909	0.0383371	Antisense	NA	N
ENSG00000229999.5	RP5-1042K10.10	0.507612	0.00292391	0.0352118	Antisense	NA	Y
ENSG00000230149.2	RP3-508I15.19	0.3136	0.00782724	0.0667144	Antisense	-3.39078
ENSG00000230177.1	RP5-1112D6.4	0.275371	0.00498094	0.0500192	Intergenic	-1.99048	Y
ENSG00000230212.5	AP000688.14	0.490009	0.000300406	0.0073163	Antisense	0.5	Y
ENSG00000230286.1	AC013472.4	1.34395	7.60555e-10	1.37469e-07	Antisense	NA	N
ENSG00000230289.1	RP11-334J6.6	0.416549	0.00454833	0.0473397	Antisense	-3.22849	Y
ENSG00000230303.4	RP11-213G2.2	0.57974	0.000340022	0.00803828	Intergenic	-0.160465	Y
ENSG00000230314.5	ELOVL2-AS1	0.640321	0.000158888	0.00450373	Antisense	0.0788554	Y
ENSG00000230415.1	RP5-902P8.10	0.476733	0.000650563	0.0126068	Intergenic	-3.74954	Y
ENSG00000230423.1	XX-C2158C6.1	0.877448	0.000569866	0.0114885	Intergenic	NA	Y
ENSG00000230438.6	SERPINB9P1	0.587649	0.000444612	0.0097037	Intergenic	1.10662
ENSG00000230448.4	LINC00276	1.42253	7.82413e-12	2.19005e-09	Intergenic	NA	Y
ENSG00000230454.1	U73166.2	0.489976	0.000352868	0.00824046	Intergenic	-3.4119	Y
ENSG00000230470.1	GS1-115G20.1	0.597599	0.00247874	0.0316373	Intronic	NA	Y
ENSG00000230471.1	LA16c-2F2.8	0.751894	0.0031107	0.0367261	Intergenic	-4.22668	Y
ENSG00000230537.1	RP11-305L7.1	0.421763	0.0084692	0.0702115	Intergenic	-0.16665	Y
ENSG00000230551.4	CTB-89H12.4	0.324303	0.000606343	0.0119862	Exonic	-2.71735
ENSG00000230561.3	LINC01183	0.405511	8.63695e-05	0.00282802	Intergenic	-0.777608
ENSG00000230606.9	AC159540.1	0.50475	0.0001921	0.0052282	Intergenic	-3.65809	Y
ENSG00000230613.1	HM13-AS1	0.495349	0.000148312	0.00428838	Antisense	1.90215	Y
ENSG00000230641.1	USP12-AS2	1.48318	7.69663e-14	2.82025e-11	Intergenic	NA	Y
ENSG00000230648.1	RP3-406P24.3	0.695994	2.23413e-05	0.0010028	Intergenic	NA	Y
ENSG00000230658.1	KLHL7-AS1	0.527364	0.000506979	0.0106709	Intergenic	-0.329886	Y
ENSG00000230663.1	FAM224B	0.619457	0.00492694	0.0496731	Intergenic	-0.670654	Y
ENSG00000230709.1	AC104024.1	0.573847	0.00912127	0.0734567	Intergenic	-0.308122	Y
ENSG00000230736.2	RP1-149A16.3	0.436711	0.00197428	0.0271639	Antisense	NA	Y
ENSG00000230741.1	SC22CB-1D7.1	0.579999	0.0137641	0.0956863	Antisense	NA	N
ENSG00000230812.4	LINC01358	0.430082	0.00557307	0.0538949	Intergenic	NA
ENSG00000230844.2	ZNF674-AS1	0.193347	0.00781765	0.066675	Intergenic	-0.0154842	Y
ENSG00000230852.1	RP11-51G5.1	0.776065	0.00203088	0.0276748	Intergenic	NA	N
ENSG00000230910.2	RP3-525N10.2	0.59595	0.00117894	0.0190688	Intergenic	-1.6683	Y
ENSG00000230945.1	LINC01507	0.633766	0.00579273	0.0550418	Intergenic	NA
ENSG00000230978.1	LINC00160	0.581114	0.0092421	0.0740157	Intergenic	-0.685891	Y
ENSG00000231056.1	RP1-290I10.5	1.04325	3.77623e-05	0.00152056	Intergenic	NA	N
ENSG00000231073.1	RP11-316M1.3	0.399664	0.0101787	0.0785814	Antisense	NA	Y
ENSG00000231105.1	RP5-1071N3.1	0.449247	0.000358232	0.00832234	Antisense	-2.65198	Y
ENSG00000231113.2	RP3-475N16.1	0.159027	0.0100023	0.077696	Intergenic	-2.21865	Y
ENSG00000231125.2	AF129075.5	0.241392	0.00699463	0.0620587	Intronic	-0.263034	Y
ENSG00000231128.4	RP5-1073O3.2	0.647425	0.00443077	0.0465323	Antisense	NA	N
ENSG00000231154.1	MORF4L2-AS1	0.338675	0.00467822	0.0480911	Antisense	-1.65477	Y
ENSG00000231173.1	AC116609.3	0.761417	0.00228426	0.0298547	Intergenic	NA	N
ENSG00000231217.1	RP11-1M18.1	0.505874	0.00169567	0.0244383	Intergenic	NA	Y
ENSG00000231233.1	CCDC147-AS1	0.369992	0.00516123	0.0512146	Intergenic	0.567626	Y
ENSG00000231236.2	AP001604.3	1.1013	3.77833e-06	0.00023502	Intergenic	NA	N
ENSG00000231305.3	RP11-723O4.2	0.691116	9.23812e-08	1.03313e-05	Intergenic	-2.20431	Y
ENSG00000231336.1	AC017006.3	1.49338	5.28672e-09	8.22749e-07	Antisense	NA	N
ENSG00000231355.1	AP000302.58	0.589685	0.00224319	0.0295381	Intergenic	NA	Y
ENSG00000231367.4	AC016995.3	-0.316166	0.0126549	0.0905041	Intergenic	-3.08377	Y
ENSG00000231393.1	RP11-331F9.3	0.645612	0.00219881	0.0291442	Antisense	-2	Y
ENSG00000231421.6	AC006050.2	1.4777	2.04077e-10	4.26203e-08	Intergenic	-0.22373	N
ENSG00000231459.1	LINC00032	0.620303	0.00131235	0.0204517	Intergenic	-1.1375	Y
ENSG00000231496.1	RP1-251M9.2	1.45045	1.31811e-08	1.86418e-06	Intergenic	NA	N
ENSG00000231518.1	RP11-327L3.3	0.539958	0.00435991	0.0459678	Intergenic	NA	Y
ENSG00000231521.1	RP11-244N9.4	0.643365	0.000152523	0.00435083	Antisense	NA	Y
ENSG00000231551.5	RP11-495P10.1	0.268454	0.00306877	0.0363803	Intergenic	-1.74839	Y
ENSG00000231574.4	RP11-91K9.1	-0.505678	0.00368356	0.0411626	Intergenic	0.949577	Y
ENSG00000231663.1	RP5-827C21.4	0.320892	0.00459602	0.0475969	Antisense	-0.592446	Y
ENSG00000231703.2	RP4-669H2.1	-0.370675	0.0128027	0.0912051	Antisense	0.382281	Y
ENSG00000231721.5	LINC-PINT	0.33896	0.000374588	0.00858448	Antisense	-1.91808
ENSG00000231742.4	LINC01273	-0.513309	0.00159081	0.0234703	Intergenic	1.62394
ENSG00000231760.4	RP11-350J20.5	0.687083	9.34939e-07	7.36027e-05	Exonic	-0.0248084	Y
ENSG00000231770.4	TMEM44-AS1	0.335083	0.000223726	0.00587092	Antisense	0.0955107	Y
ENSG00000231830.1	XX-FW83128A1.2	0.820693	4.46859e-08	5.28198e-06	Intergenic	NA	Y
ENSG00000231840.1	AC073342.12	0.589355	0.00331807	0.03852	Antisense	1.07252	Y
ENSG00000231858.4	AC067945.4	0.548776	0.00395576	0.0432378	Antisense	NA	N
ENSG00000231871.4	IPO9-AS1	0.25366	0.00632168	0.0585461	Antisense	-0.590724	Y
ENSG00000232023.2	AC009410.1	-0.633903	0.0131489	0.0927857	Intergenic	1.08556	N
ENSG00000232043.1	RP4-530I15.9	0.498048	0.00178194	0.0252371	Antisense	NA	Y
ENSG00000232044.6	LINC01105	0.782628	0.00025106	0.00636845	Intergenic	-1.35501
ENSG00000232063.1	RP11-307E17.8	0.462419	0.000366224	0.00846351	Intergenic	0.161584	Y
ENSG00000232079.5	AL035610.1	0.709073	0.00324999	0.038034	Intergenic	NA	Y
ENSG00000232131.1	NCOA7-AS1	0.957771	0.000178301	0.00493259	Antisense	NA	N
ENSG00000232227.4	AC013401.2	1.80182	8.19292e-13	2.60025e-10	Intergenic	-1.96963	N
ENSG00000232265.6	XXyac-YX155B6.5	0.678092	0.00438231	0.0461798	Intergenic	-2.09954	N
ENSG00000232283.1	RP11-240L7.4	0.600485	0.00212246	0.0284502	Antisense	NA	N
ENSG00000232298.2	RP11-10N16.3	0.550971	0.0123747	0.0892767	Antisense	NA	N
ENSG00000232352.1	SEMA3B-AS1	0.385815	0.00305216	0.0362474	Intergenic	0.59245	Y
ENSG00000232354.6	VIPR1-AS1	0.334007	0.00659674	0.0598424	Antisense	NA	Y
ENSG00000232386.8	RP11-66B24.2	-0.28535	0.00188856	0.026349	Intergenic	-0.840022	Y
ENSG00000232411.1	AC009495.3	0.480074	0.00519011	0.0513495	Intergenic	NA	Y
ENSG00000232451.1	AC016768.1	1.00085	4.75477e-05	0.00180632	Intergenic	NA	N
ENSG00000232455.2	LARS2-AS1	0.696276	0.000981231	0.0168014	Antisense	NA	Y
ENSG00000232485.2	AC098820.3	0.318962	0.00388981	0.0427444	Antisense	-1.05918	Y
ENSG00000232490.5	OSBPL10-AS1	0.569501	0.00871166	0.0713846	Antisense	NA	Y
ENSG00000232532.1	RP11-63K6.7	1.20911	6.84635e-08	7.88445e-06	Intergenic	NA	N
ENSG00000232593.5	KANTR	1.20381	5.80238e-14	2.20638e-11	Intergenic	-1.31246
ENSG00000232618.1	RP11-439L18.1	0.464637	0.00673404	0.0605698	Intergenic	NA	Y
ENSG00000232645.4	LINC01431	0.308353	0.0095557	0.0754331	Intergenic	-1.01756
ENSG00000232648.3	RP11-367N14.2	0.557437	2.06715e-08	2.73182e-06	Intergenic	NA	Y
ENSG00000232667.8	AC004862.6	-0.761809	0.002762	0.0339518	Antisense	NA	N
ENSG00000232685.4	LINC00442	0.781497	0.00163579	0.0238631	Intergenic	NA	N
ENSG00000232732.8	AC073043.1	0.5598	0.000673619	0.0129415	Intergenic	-0.367732	Y
ENSG00000232774.6	FLJ22447	0.389732	2.39856e-06	0.00016344	Exonic	-0.447494
ENSG00000232814.2	COL4A2-AS1	0.473614	0.00790292	0.0671041	Antisense	NA	Y
ENSG00000232828.1	AF196970.3	0.865996	6.15908e-07	5.18276e-05	Antisense	-0.595723	N
ENSG00000232909.1	RP3-510O8.4	0.552976	0.000518057	0.0108362	Intergenic	NA	Y
ENSG00000232934.6	RP11-324O2.3	0.275925	0.0120166	0.0875391	Exonic	NA	Y
ENSG00000232940.4	HCG25	0.222969	0.0110412	0.082875	Antisense	-1.14673	Y
ENSG00000232956.7	SNHG15	0.27005	0.00288137	0.0348793	Intergenic	-0.91899	Y
ENSG00000232987.1	LINC01219	0.638558	0.00832071	0.06938	Intergenic	-2.67624
ENSG00000232995.6	RGS5	0.392934	1.034e-06	8.03036e-05	Exonic	-1.08798
ENSG00000233006.5	AC034220.3	0.350507	0.000434429	0.00952679	Antisense	-2.07482	Y
ENSG00000233016.5	SNHG7	0.331557	0.00417847	0.0447191	Antisense	0.132114	Y
ENSG00000233029.3	RP11-439A17.9	0.460124	0.0119896	0.0874215	Antisense	-1.28481	Y
ENSG00000233033.1	CASK-AS1	0.493932	0.00868592	0.0713041	Antisense	NA	Y
ENSG00000233052.1	RP11-398B16.2	-0.625522	0.0128606	0.0914235	Intronic	NA	N
ENSG00000233068.2	RP1-140K8.1	0.764359	0.00106339	0.0177851	Intergenic	NA	N
ENSG00000233080.2	LINC01399	0.420835	0.0137306	0.0955255	Intergenic	-2.5003
ENSG00000233081.1	RP11-440G5.2	0.509543	0.0027237	0.0336446	Intergenic	NA	Y
ENSG00000233093.4	LINC00892	0.537388	0.00269273	0.0334471	Intergenic	1.58496	Y
ENSG00000233098.7	CCDC144NL-AS1	0.507726	0.000191032	0.00520618	Antisense	0.240512
ENSG00000233110.1	RP11-301L8.2	0.361368	0.0143346	0.0982052	Antisense	NA	Y
ENSG00000233200.1	RP11-324I22.2	0.669758	0.00422229	0.0450201	Intergenic	NA	N
ENSG00000233215.4	AP000472.2	-0.611241	0.00956764	0.0754978	Intergenic	-0.787621	Y
ENSG00000233246.1	RP11-415J8.5	0.50446	0.000661746	0.0127744	Antisense	NA	Y
ENSG00000233250.1	RP3-339A18.6	0.371897	0.00576732	0.054891	Intronic	NA	Y
ENSG00000233251.6	AC007743.1	0.387307	0.00552177	0.0536045	Antisense	-0.724195	Y
ENSG00000233293.1	RP11-410N8.3	1.01669	4.77644e-05	0.00181284	Antisense	NA	N
ENSG00000233330.1	RP1-12G14.7	-0.257295	0.00258455	0.0325244	Intergenic	NA	Y
ENSG00000233332.1	RP4-799P18.2	-0.805471	0.000148805	0.00429648	Antisense	-0.0772997	Y
ENSG00000233392.4	AC104809.4	1.62787	1.23242e-11	3.24674e-09	Antisense	-5.74894	Y
ENSG00000233393.1	AP000688.29	0.747824	2.42044e-06	0.00016452	Intergenic	-0.071422	Y
ENSG00000233403.1	RP11-86A5.1	0.803286	0.0016014	0.0235662	Intergenic	NA	N
ENSG00000233421.4	RP5-875O13.1	1.65355	4.45055e-18	2.718e-15	Intergenic	-0.623965
ENSG00000233478.1	RP1-187B23.1	0.385435	0.00810719	0.0683062	Antisense	NA	Y
ENSG00000233483.2	CTD-2020K17.4	-0.627801	8.17202e-06	0.000442728	Antisense	-0.947242	Y
ENSG00000233517.1	AC005162.5	0.783468	0.00125128	0.0197941	Intergenic	NA	N
ENSG00000233559.1	AC016831.7	0.624137	0.000892874	0.0156338	Intergenic	0.261633	Y
ENSG00000233569.1	RP11-500B12.1	-1.08511	7.65559e-06	0.000421795	Intergenic	NA	Y
ENSG00000233593.5	RP4-665J23.1	0.338121	0.0147509	0.0998761	Intergenic	1.17531	Y
ENSG00000233621.1	LINC01137	0.437168	0.00095955	0.0165389	Intergenic	1.10935
ENSG00000233672.5	RNASEH2B-AS1	0.428012	4.59387e-05	0.00176348	Antisense	-0.14147	Y
ENSG00000233695.2	GAS6-AS1	0.416244	0.011875	0.0868846	Exonic	-3.08077	Y
ENSG00000233723.6	LINC01122	1.04459	2.95481e-08	3.72186e-06	Intergenic	-1.35265
ENSG00000233730.1	RP4-666F24.3	-0.537489	0.00686506	0.0613307	Intergenic	NA	Y
ENSG00000233760.1	AC004947.2	-0.919066	6.13253e-05	0.0021836	Intergenic	-1.06413	Y
ENSG00000233766.6	AC098617.1	0.529346	0.0108193	0.0818614	Antisense	-0.880467	Y
ENSG00000233776.4	LINC01251	0.686582	0.00145428	0.0219591	Intergenic	NA
ENSG00000233785.1	RP13-314C10.5	1.09956	8.86789e-11	1.99686e-08	Intergenic	0.49589	Y
ENSG00000233860.1	RP11-359D14.2	0.569857	9.69942e-05	0.00308811	Antisense	NA	Y
ENSG00000233871.1	DLG5-AS1	0.374744	0.00455926	0.0474123	Intergenic	-1.40239	Y
ENSG00000233878.1	AC073133.1	-0.816789	3.39107e-05	0.00139616	Intergenic	-0.903675	Y
ENSG00000233894.1	RP4-650F12.2	-0.872946	0.000310359	0.00749979	Intronic	NA	N
ENSG00000233937.5	CTC-338M12.4	0.363898	5.96848e-06	0.000341721	Antisense	-1.50813	Y
ENSG00000233977.1	RP11-310H4.2	0.588809	0.0103206	0.0794178	Intergenic	-3.26303	N
ENSG00000234083.1	AJ006995.3	0.60038	0.0146509	0.0994833	Intergenic	NA	N
ENSG00000234147.1	RP3-460G2.2	-0.798223	0.000350524	0.00819998	Intergenic	-0.4045	Y
ENSG00000234148.2	RP11-395L14.3	0.596495	0.0143327	0.0982052	Intergenic	NA	N
ENSG00000234171.2	RNASEH1-AS1	0.257988	0.000949603	0.0164203	Antisense	1.76812
ENSG00000234181.1	RP11-182N22.8	0.546262	0.00115151	0.018753	Antisense	NA	Y
ENSG00000234182.1	RP11-118K6.2	0.579481	0.00558559	0.0539771	Intergenic	NA	Y
ENSG00000234185.2	RP5-1132H15.1	0.426199	0.0030872	0.0365381	Antisense	NA	Y
ENSG00000234215.2	RP5-942I16.1	0.470705	0.00617185	0.0575055	Intergenic	-0.811526	Y
ENSG00000234263.1	RP3-325F22.3	-0.44565	0.00407293	0.0439915	Antisense	NA	Y
ENSG00000234286.1	AC006026.13	-0.427467	0.00154838	0.0229958	Antisense	NA	Y
ENSG00000234290.2	AC116366.6	0.409786	0.00122316	0.0195333	Antisense	-2.52408	Y
ENSG00000234352.8	AC009264.1	-0.771427	0.00217551	0.0289401	Antisense	-1.47063
ENSG00000234389.1	AC007278.3	0.744681	0.000504665	0.0106434	Intronic	NA	Y
ENSG00000234396.3	RP11-181G12.4	0.692548	0.000250284	0.00635678	Antisense	NA	Y
ENSG00000234423.1	LINC01250	0.579408	0.0122047	0.0883967	Intergenic	-1.71698
ENSG00000234449.2	RP11-706O15.3	-0.604274	0.0131631	0.0928372	Intergenic	-0.385094	Y
ENSG00000234509.1	AP000253.1	0.371014	0.00824285	0.068979	Intergenic	-2.78226	Y
ENSG00000234535.1	RP11-37L2.1	-0.701118	3.73918e-06	0.000232945	Intergenic	NA	Y
ENSG00000234546.2	RP3-510D11.2	0.349485	0.000748359	0.0139295	Intergenic	-0.369735	Y
ENSG00000234571.1	RP5-998N21.4	0.68007	0.00116814	0.0189245	Intergenic	-2.35364	Y
ENSG00000234593.1	RP4-704D23.1	0.770399	0.00231909	0.0301534	Intergenic	0.100988	N
ENSG00000234636.2	MED14OS	0.398339	4.90525e-05	0.00184781	Antisense	1.65024
ENSG00000234665.7	RP11-262H14.3	0.963938	1.10379e-05	0.000565316	Intergenic	-0.0248384	Y
ENSG00000234695.1	AC002076.10	-0.719614	0.00459944	0.0475969	Antisense	-2.19878	N
ENSG00000234707.2	RP11-745C15.2	0.894714	4.19766e-08	5.03557e-06	Antisense	NA	Y
ENSG00000234722.3	LINC01287	1.23497	9.28546e-08	1.03389e-05	Intergenic	0.67492
ENSG00000234741.6	GAS5	0.318731	0.00470549	0.0482757	Antisense	-0.263968	Y
ENSG00000234771.3	SLC25A25-AS1	0.355565	0.00889454	0.0722224	Antisense	-2.75757
ENSG00000234818.1	AC092687.5	1.03112	6.96427e-09	1.0553e-06	Antisense	NA	Y
ENSG00000234828.6	RP11-526A4.1	1.86639	1.90284e-13	6.66939e-11	Intergenic	NA	N
ENSG00000234840.1	LINC01239	0.463358	0.00654164	0.0596412	Intergenic	-2.49186
ENSG00000234917.2	RP5-994D16.3	0.344935	0.00123596	0.0196675	Intergenic	-1.1642	Y
ENSG00000234921.1	RP11-85O21.5	0.803989	0.00166118	0.024094	Antisense	NA	N
ENSG00000234929.1	AC018685.1	-0.48536	0.0130501	0.0923148	Intergenic	NA	Y
ENSG00000235020.3	RP11-109I13.2	-0.555307	0.00465253	0.0479615	Antisense	NA	N
ENSG00000235077.1	AC073842.19	0.502886	0.00560269	0.054029	Intergenic	-1.01027	Y
ENSG00000235100.3	RP11-80H5.9	0.349719	0.00500112	0.0500988	Intergenic	-0.305598	Y
ENSG00000235123.4	DSCAM-AS1	1.2337	1.12142e-06	8.60971e-05	Antisense	0.469393	Y
ENSG00000235138.1	RP11-374P20.4	0.46281	0.00350754	0.0398249	Antisense	NA	Y
ENSG00000235146.2	RP5-857K21.2	1.10363	7.0309e-06	0.000392513	Intergenic	NA	Y
ENSG00000235172.6	LINC01366	0.446937	0.0107896	0.0817808	Intergenic	0.58255
ENSG00000235192.1	AC009495.2	0.458125	0.000381015	0.00868641	Intergenic	-1.31798	Y
ENSG00000235209.1	CTA-150C2.13	0.762723	0.000690492	0.0131467	Intergenic	0.584963	N
ENSG00000235237.1	RP1-151B14.6	0.539044	0.00503082	0.0502795	Antisense	NA	N
ENSG00000235245.1	RP11-122K13.12	0.395486	0.00125942	0.0198683	Intronic	-3.61527	Y
ENSG00000235246.1	RP1-5O6.5	0.679313	0.00295628	0.0354112	Antisense	NA	N
ENSG00000235257.7	ITGA9-AS1	0.21446	0.00466693	0.0480608	Antisense	0.363872
ENSG00000235263.1	RP13-392I16.1	0.894401	0.000112088	0.00345409	Intergenic	0.804276	N
ENSG00000235295.1	FLJ41941	0.504865	0.0108769	0.0821018	Intergenic	-0.263034
ENSG00000235351.1	AC114730.11	0.398028	0.00910829	0.0733815	Antisense	NA
ENSG00000235385.1	GS1-600G8.5	-0.768362	0.00234993	0.0304464	Intergenic	1.06308	N
ENSG00000235399.1	RP11-204P2.3	-0.682021	0.000472969	0.0101783	Intergenic	NA	Y
ENSG00000235475.1	LINC01372	0.353298	0.0138936	0.0962706	Intergenic	-2.44001
ENSG00000235481.2	UBE2R2-AS1	0.5029	0.000148699	0.00429648	Antisense	1.20645
ENSG00000235497.4	AC012506.4	0.594752	0.00904765	0.073039	Intergenic	NA	N
ENSG00000235532.1	LINC00402	0.535195	0.00104498	0.0175354	Intergenic	4	Y
ENSG00000235545.1	RP11-230B22.1	0.521999	0.000381782	0.00869407	Intergenic	-0.567921	Y
ENSG00000235565.1	RP11-86H7.7	-0.431075	0.00145755	0.0219871	Intergenic	NA	Y
ENSG00000235629.1	AC090952.5	0.619451	0.00143382	0.0217511	Intergenic	-3.56071	Y
ENSG00000235641.4	LINC00484	-0.452503	0.00527065	0.0518789	Intergenic	-1.58496	Y
ENSG00000235643.1	RP1-69M21.2	-0.626478	0.0147005	0.0996353	Intergenic	-1.86848	Y
ENSG00000235652.6	RP11-545I5.3	-0.320487	0.00150747	0.0225329	Antisense	-0.398074	Y
ENSG00000235687.7	LINC00993	0.96634	8.655e-05	0.00283163	Intronic	-3.84462	N
ENSG00000235688.1	AC116614.1	0.674287	0.00110823	0.0182847	Intergenic	-3.52442	Y
ENSG00000235703.4	LINC00894	0.534395	0.000207918	0.00553536	Antisense	-4.81606	Y
ENSG00000235706.6	DICER1-AS1	0.408324	0.000559468	0.0113485	Antisense	-2.38436	Y
ENSG00000235740.1	RP11-436I24.1	0.686044	0.00219592	0.0291155	Antisense	NA	N
ENSG00000235802.1	HCFC1-AS1	-0.545627	0.00364238	0.040828	Antisense	NA	Y
ENSG00000235831.5	BHLHE40-AS1	-0.510855	0.00270883	0.0335231	Antisense	0.307525	Y
ENSG00000235881.2	AC114776.3	0.641864	0.00344223	0.0393606	Intergenic	NA	Y
ENSG00000235884.3	LINC00941	-0.404263	0.00681806	0.0610646	Intergenic	0.224312	Y
ENSG00000235978.5	AC018816.3	-1.30581	1.07928e-08	1.54813e-06	Antisense	1.05516
ENSG00000236030.1	LINC01036	0.657463	0.00441804	0.0464471	Intergenic	NA	Y
ENSG00000236065.2	RP1-117O3.2	0.612853	0.00324327	0.0379798	Antisense	NA	Y
ENSG00000236076.1	LINC01072	-0.634312	0.00777521	0.0664244	Intergenic	NA	N
ENSG00000236199.1	RP11-264I13.2	0.30578	3.0677e-05	0.00128134	Antisense	NA	Y
ENSG00000236200.4	KDM4A-AS1	0.29831	0.00207259	0.0280241	Antisense	-0.655514	Y
ENSG00000236266.1	RP3-467L1.4	0.46708	0.000104626	0.00327418	Antisense	-1.8365	Y
ENSG00000236305.1	RP11-126L15.4	0.361385	0.00294553	0.0353803	Antisense	NA	Y
ENSG00000236385.1	RP11-114M1.2	0.780495	0.00087027	0.0154325	Intergenic	0.187627	Y
ENSG00000236427.1	RP11-107M16.2	0.892778	5.84138e-07	4.96727e-05	Intergenic	NA	Y
ENSG00000236471.1	AF127577.12	0.404565	0.00858834	0.0708349	Intergenic	NA	Y
ENSG00000236498.1	AC107081.5	0.432999	0.00161634	0.0236564	Antisense	NA	Y
ENSG00000236511.1	LINC01231	0.746918	0.00326487	0.0380944	Intergenic	NA
ENSG00000236519.1	LINC01424	0.416314	0.00530189	0.0520846	Intergenic	-1.47051
ENSG00000236525.1	AC007278.2	0.79012	0.00183342	0.02574	Intronic	NA	N
ENSG00000236532.4	AL035610.2	1.51432	1.98242e-11	4.96307e-09	Intergenic	NA	Y
ENSG00000236611.1	AP000343.2	0.612454	0.00701232	0.0620805	Intergenic	0.321928	N
ENSG00000236663.1	AP001631.9	0.816114	0.000815055	0.0147386	Intergenic	NA	Y
ENSG00000236665.1	AC114808.2	0.609679	0.011184	0.0836664	Antisense	NA	N
ENSG00000236830.5	CBR3-AS1	0.331046	9.78768e-05	0.00310272	Antisense	-0.521629	Y
ENSG00000236841.6	AC007750.5	-0.727963	0.00149717	0.0224227	Antisense	NA	Y
ENSG00000236871.5	LINC00106	0.446798	0.00444125	0.0465938	Intergenic	-3.94342
ENSG00000236986.5	RP11-544A12.4	0.504773	0.00212685	0.0284751	Antisense	NA	Y
ENSG00000237001.5	WASF3-AS1	0.849259	0.000132814	0.00392472	Antisense	NA	N
ENSG00000237009.2	GLIS3-AS1	0.621429	0.00265889	0.0331494	Antisense	NA	Y
ENSG00000237037.8	NDUFA6-AS1	0.203715	0.000523663	0.0109081	Antisense	-0.471402	Y
ENSG00000237101.1	RP11-365O16.6	0.450436	0.00207195	0.0280241	Antisense	-2.65372	Y
ENSG00000237188.3	RP11-337C18.8	0.240543	0.00347338	0.0395597	Antisense	0.0810457	Y
ENSG00000237280.1	RP11-96C23.9	0.62651	0.00410552	0.0441636	Intronic	NA	Y
ENSG00000237372.2	UNQ6494	0.474347	0.00197119	0.0271541	Intergenic	0.0457165
ENSG00000237399.6	PITRM1-AS1	0.325425	0.00127095	0.0199721	Antisense	-2.59912	Y
ENSG00000237413.4	MGC27382	0.673386	0.00684	0.0611927	Intronic	NA
ENSG00000237419.1	RP11-885N19.6	0.610728	0.00774192	0.0662703	Intergenic	NA	N
ENSG00000237438.5	CECR7	-0.466209	0.0142723	0.0980022	Intergenic	-0.226243	Y
ENSG00000237481.1	RP4-803J11.2	0.557086	0.000193893	0.00525924	Antisense	-3.11658	Y
ENSG00000237513.1	RP11-325F22.2	0.458152	0.0138958	0.0962706	Intergenic	NA	Y
ENSG00000237567.1	RP3-359N14.2	0.650868	0.0110851	0.0831217	Intergenic	NA	Y
ENSG00000237604.1	AP001056.1	0.793348	0.000271852	0.00680169	Intergenic	-0.888969	Y
ENSG00000237643.1	RP11-462G2.1	-0.917967	0.000305698	0.00740936	Intergenic	1.56323	Y
ENSG00000237646.1	HLCS-IT1	0.656831	0.000784775	0.0143912	Intronic	NA	Y
ENSG00000237647.7	ERICH1-AS1	0.450816	0.00871108	0.0713846	Antisense	-3.11548	Y
ENSG00000237718.2	AC009095.4	0.372486	0.0055745	0.0538958	Antisense	NA	Y
ENSG00000237742.5	RP11-624M8.1	0.443163	0.00632884	0.058589	Antisense	1.32336	Y
ENSG00000237753.1	AC079922.3	0.422923	0.000306311	0.00741977	Intergenic	-1.62769	Y
ENSG00000237773.4	AC003075.4	-0.406364	0.010833	0.0819294	Antisense	1.43091	Y
ENSG00000237781.3	RP11-54A4.2	0.608767	0.000315479	0.00758711	Antisense	NA	Y
ENSG00000237797.1	RP11-472N13.3	0.405348	0.00489135	0.0494869	Intergenic	NA	Y
ENSG00000237877.5	LINC01473	0.300751	0.00149963	0.022437	Intergenic	-1.39565
ENSG00000237886.1	LINC01573	0.469544	0.000861163	0.0153305	Intergenic	-4.74616
ENSG00000237923.1	XXbac-BPG27H4.8	0.71002	0.0053036	0.0520887	Intergenic	1.57354	N
ENSG00000237940.3	AC093642.3	0.555807	0.000114533	0.00350531	Intergenic	-4.92745	Y
ENSG00000237975.5	FLG-AS1	0.619666	0.000185238	0.00507572	Antisense	-1.23277	Y
ENSG00000238005.2	RP11-443B7.1	0.714114	9.32498e-06	0.000493257	Intergenic	0.838609	Y
ENSG00000238018.2	AC093110.3	0.412181	0.00862654	0.0709612	Antisense	NA	Y
ENSG00000238057.7	ZEB2-AS1	1.01513	1.94349e-10	4.08001e-08	Antisense	-1.96513	Y
ENSG00000238058.1	RP11-432J22.2	0.237188	0.00347207	0.0395597	Intergenic	NA	Y
ENSG00000238062.4	SPATA3-AS1	0.853643	1.251e-05	0.000623288	Intergenic	0.988727
ENSG00000238078.1	LINC01352	0.385212	0.00458634	0.0475834	Intergenic	NA
ENSG00000238121.4	LINC00426	0.42512	0.00421329	0.0449749	Intergenic	0.503332	Y
ENSG00000238217.4	AC093590.1	-0.637976	0.00493339	0.0496916	Intergenic	NA	Y
ENSG00000238232.1	RP11-95P13.2	-0.784782	0.00222562	0.029374	Intergenic	NA	N
ENSG00000238266.1	LINC00707	0.733036	0.00174338	0.0248811	Intergenic	1.57889	N
ENSG00000238272.1	RP3-436N22.3	0.632378	0.0131776	0.0929031	Antisense	NA	N
ENSG00000238279.1	BX470102.3	0.504482	0.00616287	0.0574884	Antisense	-1.71049	Y
ENSG00000238282.1	RP5-1164C1.2	0.823443	0.00124045	0.019688	Intergenic	NA	N
ENSG00000239300.4	RP11-400L8.2	0.469965	2.72745e-05	0.00116211	Antisense	NA	Y
ENSG00000239335.4	LLPH-AS1	-0.748691	3.6941e-05	0.00149439	Antisense	-0.659393
ENSG00000239415.1	AP001469.9	0.310771	0.00160588	0.023589	Exonic	-3.23744	Y
ENSG00000239523.4	MYLK-AS1	0.557322	7.45371e-06	0.000413256	Antisense	-1.13066	Y
ENSG00000239552.2	HOXB-AS2	0.65214	0.00100793	0.0171313	Antisense	NA	Y
ENSG00000239636.1	RP4-728D4.2	0.426351	0.000554866	0.011284	Antisense	-0.785286	Y
ENSG00000239653.1	PSMD6-AS2	0.404994	0.00221935	0.0293008	Antisense	-4.19685	Y
ENSG00000239801.1	RP11-755B10.2	0.396939	0.00703362	0.0621992	Antisense	NA	Y
ENSG00000240005.4	RP11-293A21.1	0.601494	5.43903e-05	0.00200394	Antisense	1.48238	Y
ENSG00000240006.1	RP11-200A1.1	-0.559343	0.00959472	0.0756375	Intergenic	NA	Y
ENSG00000240040.4	AC096579.13	0.62974	0.0120998	0.087894	Intergenic	NA	Y
ENSG00000240137.4	ERICH6-AS1	0.367718	0.000546599	0.0111723	Antisense	1.38143
ENSG00000240211.1	RP11-758P17.3	0.424796	0.000828367	0.0149125	Antisense	NA	Y
ENSG00000240401.7	AC012358.8	0.582457	1.62938e-07	1.67968e-05	Antisense	-0.594077	Y
ENSG00000240731.1	RP5-890O3.9	0.312421	0.000127409	0.00378721	Exonic	-2.03311	Y
ENSG00000240758.2	RP11-155G14.6	0.493852	0.000206578	0.00551061	Exonic	-1.78406	Y
ENSG00000240889.1	NDUFB2-AS1	0.233507	0.000963614	0.0165701	Antisense	-0.165798
ENSG00000240996.1	RP11-80H5.7	0.422521	0.00560303	0.054029	Intergenic	-1.38148	Y
ENSG00000241014.1	RP11-244H3.1	0.364783	2.21167e-05	0.000998873	Exonic	-2.35751	Y
ENSG00000241163.6	LINC00877	0.572944	0.000117348	0.00358057	Intergenic	-0.243883	Y
ENSG00000241213.1	RP11-768G7.2	0.670382	0.00785816	0.0668649	Intergenic	NA	N
ENSG00000241269.1	AC093620.5	0.309066	0.00914183	0.0735048	Antisense	-0.699359	Y
ENSG00000241288.6	RP11-379B18.5	0.316403	0.013391	0.0938697	Intergenic	-3.13905	Y
ENSG00000241490.1	RP11-553L6.2	0.7234	0.00103796	0.0174543	Antisense	1.11103	N
ENSG00000241520.1	AC098820.4	0.424467	0.00384811	0.0424249	Antisense	-0.901537	Y
ENSG00000241754.1	RP11-280H21.1	1.23466	1.37849e-06	0.000103085	Intergenic	NA	N
ENSG00000241769.6	LINC00893	0.470297	0.00160928	0.0236132	Exonic	-4.83915	Y
ENSG00000241770.1	RP11-555M1.3	0.407683	0.00720984	0.0632166	Intergenic	NA	Y
ENSG00000241886.1	RP11-242C19.2	0.490967	0.00657091	0.0597197	Intronic	-4.4027	Y
ENSG00000241954.1	RP1-149A16.17	0.417625	0.0130445	0.0923078	Intergenic	NA	Y
ENSG00000242021.2	RP11-268G12.3	0.920352	0.000328904	0.00785374	Intergenic	-1.67525	N
ENSG00000242125.3	SNHG3	0.36156	0.00186385	0.0260854	Exonic	-0.51542	Y
ENSG00000242136.1	RP11-734K21.2	0.693423	0.00536939	0.0525559	Intergenic	-0.263034	N
ENSG00000242317.1	RP11-875H7.5	1.51622	3.12397e-09	5.05694e-07	Intergenic	NA	N
ENSG00000242474.1	AC093627.9	0.279976	0.000357797	0.00832234	Intergenic	-1.32276	Y
ENSG00000242578.1	RP11-469J4.3	0.809213	7.30354e-05	0.00249346	Intergenic	-4.21378	Y
ENSG00000242759.5	LINC00882	0.301319	0.0120543	0.0876871	Intergenic	0.398866	Y
ENSG00000242781.1	RP11-47P18.2	1.55099	6.05137e-10	1.10869e-07	Intergenic	NA	Y
ENSG00000242795.2	RP11-3K16.2	-0.651068	0.0112077	0.0838123	Intronic	NA	N
ENSG00000242798.1	RP11-506M12.1	0.512693	0.000114457	0.00350531	Antisense	-3.97083	Y
ENSG00000243176.4	RP11-550I24.2	0.214476	0.00947796	0.0750399	Antisense	1.101	Y
ENSG00000243193.3	CTA-360L10.1	0.697922	0.00172182	0.0246877	Antisense	-3.67646	N
ENSG00000243197.6	TUSC7	0.76937	0.00256132	0.0323938	Antisense	NA	N
ENSG00000243230.1	RP11-286H14.8	0.388658	0.00471583	0.0483023	Antisense	NA	Y
ENSG00000243273.1	RP11-166N6.2	0.754056	0.00286129	0.0346962	Antisense	NA	N
ENSG00000243321.3	RP11-167H9.3	0.993131	8.60633e-05	0.00282258	Intergenic	0.825971
ENSG00000243368.2	MCCC1-AS1	0.339552	0.0106599	0.0811923	Antisense	NA	Y
ENSG00000243701.4	LINC00883	0.494821	0.000467593	0.0100841	Intergenic	-0.771505	Y
ENSG00000243819.4	RN7SL832P	0.355631	0.00290903	0.0351061	Intergenic	0.799676	Y
ENSG00000243832.1	RP11-202A13.1	0.791309	0.00195152	0.0269664	Intergenic	NA	N
ENSG00000244055.1	AC007566.10	0.552071	1.95842e-06	0.000136808	Exonic	-2.6174	Y
ENSG00000244063.1	AC024704.2	0.714634	2.13731e-05	0.000976743	Intergenic	NA	Y
ENSG00000244124.1	ATP1B3-AS1	0.631819	0.000156813	0.00445116	Antisense	NA	Y
ENSG00000244128.4	LINC01322	1.24909	8.94962e-07	7.10103e-05	Intergenic	-0.134615
ENSG00000244137.1	RP11-99J16__A.2	0.478823	0.00887106	0.0721488	Exonic	NA	Y
ENSG00000244151.1	RP11-148K1.12	0.392281	0.00337322	0.0388825	Antisense	-3.63195
ENSG00000244161.1	FLNB-AS1	0.474583	0.000161716	0.00457204	Antisense	NA	Y
ENSG00000244184.1	RP11-314A20.2	0.463881	0.000354235	0.00826281	Antisense	1.26994	Y
ENSG00000244265.1	SIAH2-AS1	0.485395	0.000417019	0.0092649	Antisense	0	Y
ENSG00000244268.1	RP11-529G21.2	0.602968	0.00215505	0.0287438	Intergenic	NA	Y
ENSG00000244286.1	ITGB5-AS1	0.691673	0.000815951	0.0147482	Antisense	NA	Y
ENSG00000244502.2	HDAC11-AS1	0.431829	0.00544573	0.0530919	Antisense	0.076155	N
ENSG00000244567.1	AC096772.6	-0.243969	0.000550459	0.0112227	Intergenic	1.53341
ENSG00000244701.1	RP5-894A10.2	0.2832	0.00942118	0.0747813	Exonic	-3.41549
ENSG00000244945.1	RP11-1379J22.2	0.367311	0.00146317	0.0220388	Antisense	-3.6322	Y
ENSG00000245017.2	RP11-181C3.1	0.449166	0.000119164	0.00361682	Intergenic	0.85376
ENSG00000245080.5	RP11-320N21.1	0.584737	0.00181121	0.0255482	Antisense	0.930479
ENSG00000245105.2	A2M-AS1	-0.39222	3.36988e-06	0.000215261	Antisense	-1.18279	Y
ENSG00000245148.2	ARAP1-AS2	0.402701	0.00793812	0.0672472	Antisense	NA	N
ENSG00000245149.3	RNF139-AS1	0.290006	0.00812099	0.0683938	Intergenic	-2.68036	Y
ENSG00000245498.5	RP11-677M14.7	0.565872	6.88852e-07	5.67803e-05	Antisense	-1.61328	Y
ENSG00000245526.7	LINC00461	0.566371	0.00366582	0.041021	Intergenic	-2.79761	Y
ENSG00000245532.5	NEAT1	0.387716	0.00656382	0.0597134	Intergenic	-3.16837	Y
ENSG00000245534.5	RORA-AS1	-0.339391	0.000663309	0.0127985	Antisense	0.32075
ENSG00000245571.5	AP001258.4	0.545555	1.13257e-06	8.67018e-05	Antisense	-0.510633	Y
ENSG00000245614.3	DDX11-AS1	0.251311	0.0147602	0.0998938	Antisense	-1.07579	Y
ENSG00000245667.2	RP5-940J5.8	0.476444	0.0145344	0.0989427	Antisense	NA	Y
ENSG00000245685.5	AF146191.4	-0.296886	0.0122222	0.0884613	Intergenic	-0.792323	Y
ENSG00000245688.1	CTB-26E19.1	0.696726	0.00650065	0.0593987	Intronic	-1.9832	N
ENSG00000245694.7	CRNDE	0.276622	0.00578861	0.0550286	Intergenic	-0.954486	Y
ENSG00000245719.1	RP11-34F13.2	-0.59052	0.0104266	0.0800099	Antisense	0.584962	N
ENSG00000245832.5	RP11-179A16.1	0.692135	0.000523206	0.0109043	Intergenic	NA	Y
ENSG00000245849.5	RAD51-AS1	0.244889	0.0105	0.0802931	Antisense	-2.84074	Y
ENSG00000245888.5	FLJ21408	0.385512	0.000819728	0.0147959	Antisense	-1.82747
ENSG00000245904.3	RP11-796E2.4	0.51675	2.46178e-05	0.00107743	Antisense	-2.98342	Y
ENSG00000245910.7	SNHG6	0.38624	0.000731799	0.0137014	Antisense	2.00465	Y
ENSG00000245954.5	RP11-18H21.1	0.57903	0.00192203	0.0266896	Intergenic	1.57886	Y
ENSG00000245970.2	KB-1208A12.3	0.404712	0.00066949	0.0128807	Antisense	-3.41504
ENSG00000245975.2	RP11-30K9.6	0.246628	0.00637282	0.0587936	Intergenic	-0.0390944	Y
ENSG00000246089.3	RP11-115C21.2	0.331057	0.000144999	0.00421374	Antisense	0.510173	Y
ENSG00000246145.1	RRS1-AS1	0.461794	0.000176876	0.00491001	Intergenic	-1.666
ENSG00000246174.6	KCTD21-AS1	0.502991	5.547e-06	0.000321715	Antisense	0.0629473	Y
ENSG00000246263.2	KB-431C1.4	0.28152	0.000486346	0.010372	Antisense	-0.0940169	Y
ENSG00000246339.5	EXTL3-AS1	0.529771	0.000152988	0.00436104	Antisense	-2.90536	Y
ENSG00000246366.5	RP11-382J12.1	0.613635	1.22948e-06	9.28027e-05	Antisense	NA
ENSG00000246375.2	RP11-10L7.1	0.717586	3.39053e-06	0.000215896	Intergenic	-3.53605	Y
ENSG00000246477.3	AF131216.6	0.378581	0.00876311	0.0716188	Antisense	NA
ENSG00000246526.2	RP11-539L10.2	0.545564	4.9997e-05	0.00187638	Intergenic	-1.84662	Y
ENSG00000246528.3	RP11-159H10.3	0.339348	0.00854208	0.0705703	Antisense	-0.578756	Y
ENSG00000246740.2	PLA2G4E-AS1	0.698236	3.87367e-07	3.47742e-05	Antisense	1
ENSG00000246982.5	RP1-179N16.6	0.40212	0.00181801	0.0256039	Antisense	-2.78101	Y
ENSG00000247092.5	SNHG10	0.402385	8.03991e-05	0.00268933	Antisense	-1.13065	Y
ENSG00000247095.2	MIR210HG	0.476994	0.000838994	0.0150366	Intergenic	-1.96922	Y
ENSG00000247121.5	CTD-2260A17.2	-0.176056	0.0103622	0.0796472	Antisense	0.146595
ENSG00000247137.7	RP11-727A23.5	0.395831	7.85062e-06	0.000429939	Antisense	-0.510136	Y
ENSG00000247157.5	LINC01252	0.529111	0.000230456	0.00600063	Intergenic	-2.3456
ENSG00000247400.3	DNAJC3-AS1	-0.214471	0.0139043	0.0962791	Intergenic	-0.310012	Y
ENSG00000247556.5	OIP5-AS1	-0.159532	0.010849	0.081982	Antisense	-0.136614	Y
ENSG00000247624.5	CPEB2-AS1	0.386999	0.0102698	0.0790878	Intergenic	-2.6287	Y
ENSG00000247679.2	RP11-1277A3.1	0.322198	4.43065e-05	0.00172162	Intergenic	-1.8857	Y
ENSG00000247796.2	CTD-2366F13.1	-0.241907	0.000627127	0.012302	Antisense	0.276804	Y
ENSG00000247982.5	LINC00926	0.439391	0.0022581	0.0296474	Intergenic	-3.76913	Y
ENSG00000248019.2	FAM13A-AS1	0.561243	2.62082e-05	0.0011301	Antisense	-4.62429	Y
ENSG00000248092.6	NNT-AS1	-0.356774	6.27713e-06	0.000358375	Antisense	0.263798	Y
ENSG00000248138.4	RP11-446J8.1	0.779508	0.00203355	0.0277006	Antisense	-2.47805	N
ENSG00000248165.1	RP11-44F21.2	0.725873	0.00391184	0.0428599	Antisense	NA	N
ENSG00000248206.1	RP11-739P1.2	-0.54674	0.00863272	0.0709975	Intronic	0.943416	Y
ENSG00000248279.4	CTD-2218G20.2	1.48673	1.50575e-09	2.5717e-07	Intergenic	NA	Y
ENSG00000248318.1	RP11-713M15.1	0.766112	0.000828241	0.0149125	Antisense	NA	N
ENSG00000248330.4	LINC00613	0.84433	1.06427e-05	0.000547163	Intergenic	NA	N
ENSG00000248356.1	RP11-557J10.4	0.513556	0.000847962	0.0151569	Antisense	0	Y
ENSG00000248363.4	CTC-261N6.1	0.682044	0.00078869	0.0144433	Intergenic	NA	N
ENSG00000248416.1	RP11-1191J2.4	0.66588	0.00102682	0.017368	Antisense	NA	Y
ENSG00000248429.4	RP11-597D13.9	-0.649093	1.73987e-07	1.76647e-05	Exonic	-1.09344	Y
ENSG00000248445.4	SEMA6A-AS1	0.375049	0.000527411	0.0109633	Antisense	-3.39456
ENSG00000248469.1	RP11-826N14.2	0.663419	0.000845739	0.0151239	Antisense	NA
ENSG00000248528.1	CTC-458G6.2	-0.613208	0.00340495	0.0390784	Intergenic	NA	Y
ENSG00000248544.2	CTB-47B11.3	0.405065	0.00675756	0.0607148	Antisense	-2.35022	Y
ENSG00000248599.1	FLJ42969	1.17339	1.25587e-08	1.7824e-06	Intergenic	-0.335688
ENSG00000248677.1	CTD-2044J15.1	0.514578	0.000274519	0.00685141	Intergenic	NA	Y
ENSG00000248738.5	RP11-87E22.2	0.394051	0.0132989	0.0934516	Antisense	-1.17187	Y
ENSG00000248783.1	RP11-308B16.2	0.536269	0.0117195	0.0860682	Intergenic	NA	N
ENSG00000248837.4	RP11-412P11.1	1.28219	1.35071e-08	1.90361e-06	Intergenic	NA	N
ENSG00000248869.4	RP11-138I17.1	0.841822	0.000984017	0.0168277	Intergenic	NA	N
ENSG00000248986.1	RP11-774O3.1	0.644549	0.00443282	0.0465402	Intergenic	NA	Y
ENSG00000249022.1	RP11-285C1.2	0.842708	0.000223326	0.00586424	Intergenic	NA	N
ENSG00000249102.1	CTD-2066L21.1	1.2186	1.91589e-06	0.000134302	Intergenic	NA	N
ENSG00000249106.1	RP11-806K15.1	1.0471	3.88964e-05	0.00155845	Antisense	NA	N
ENSG00000249116.1	CTD-2194D22.3	0.595566	7.95458e-05	0.00266743	Antisense	NA	Y
ENSG00000249128.1	RP11-2N5.1	0.925737	0.000208565	0.00554894	Intergenic	NA	N
ENSG00000249159.5	RP11-480D4.2	-0.437815	0.00716579	0.0629125	Intergenic	NA	Y
ENSG00000249173.4	LINC01093	0.536306	0.000368979	0.00849853	Intergenic	NA
ENSG00000249199.1	CTD-2139B15.5	1.20702	1.35946e-06	0.000101851	Intergenic	NA	N
ENSG00000249201.2	CTD-3080P12.3	0.848747	6.27565e-05	0.00222212	Intergenic	-5.15735	Y
ENSG00000249203.1	RP11-473L15.3	0.972468	0.000133914	0.00394855	Intergenic	NA	N
ENSG00000249328.2	RP11-26J3.1	1.40719	3.67829e-13	1.21525e-10	Intergenic	-2.12182	Y
ENSG00000249352.4	RP11-141O11.2	0.342994	0.00663404	0.060022	Intergenic	1
ENSG00000249362.1	CTD-2316B1.1	0.584449	0.00513544	0.0510341	Intergenic	NA	N
ENSG00000249379.1	RP1-27K12.4	0.85108	9.15436e-07	7.22674e-05	Antisense	-0.584962	Y
ENSG00000249392.1	RP11-725D20.1	1.22351	5.73162e-07	4.89459e-05	Intergenic	NA	N
ENSG00000249430.1	CTD-2231H16.1	-0.576314	0.0016051	0.023589	Intergenic	-0.287006	Y
ENSG00000249453.1	RP13-497K6.1	0.937203	1.37508e-05	0.000671094	Antisense	NA	N
ENSG00000249494.4	CTB-161M19.4	0.649185	1.07743e-09	1.90474e-07	Antisense	NA	Y
ENSG00000249526.1	CTB-35F21.1	0.711376	0.00261829	0.0328055	Intergenic	NA	N
ENSG00000249592.4	RP11-440L14.1	0.245994	0.0099114	0.0772576	Antisense	-2.41305	Y
ENSG00000249602.1	RP11-98D18.3	0.3088	0.00101512	0.017228	Exonic	NA	Y
ENSG00000249631.4	RP11-281P23.2	0.538	0.0130574	0.0923504	Intergenic	-0.863498	Y
ENSG00000249641.2	HOXC13-AS	1.15323	3.71696e-06	0.000231919	Antisense	0.320064
ENSG00000249664.1	CTD-2227C6.2	0.534437	0.010276	0.0791055	Intergenic	NA	Y
ENSG00000249717.1	RP11-44F21.3	0.732834	0.000381584	0.00869407	Antisense	NA	Y
ENSG00000249736.1	RP11-83M16.5	0.735575	0.00209672	0.0282174	Intergenic	NA	N
ENSG00000249752.1	RP11-563M4.1	0.841131	0.000131697	0.00389743	Intergenic	NA	Y
ENSG00000249786.6	EAF1-AS1	0.332433	0.00209538	0.0282093	Exonic	-2.3787	Y
ENSG00000249846.5	RP11-77P16.4	0.387026	0.000966216	0.0165936	Intronic	-1.82746	Y
ENSG00000249849.1	RP11-1101H11.1	0.48191	0.0141204	0.0973132	Antisense	NA	Y
ENSG00000249859.6	PVT1	0.525939	1.94819e-06	0.000136329	Intergenic	-1.08974	Y
ENSG00000249923.1	XXbac-B444P24.8	-0.608608	0.000813463	0.0147197	Intergenic	NA	Y
ENSG00000249937.4	RP11-454P21.1	0.965499	6.45794e-05	0.00226348	Intergenic	NA	Y
ENSG00000249984.1	CTC-529L17.2	-0.491331	0.0145752	0.0991047	Intergenic	NA	Y
ENSG00000250033.4	SLC7A11-AS1	0.587044	0.00183195	0.0257374	Antisense	1.24101	Y
ENSG00000250056.4	LINC01018	-0.5727	0.00140909	0.0214893	Intergenic	1.24159	Y
ENSG00000250075.4	RP11-584P21.2	0.546104	0.000916033	0.0159493	Intergenic	-4.63026	Y
ENSG00000250159.5	RP11-381K20.2	-0.435089	0.012488	0.0898462	Antisense	0.24493	Y
ENSG00000250174.4	MYLK-AS2	1.13517	1.64682e-07	1.68047e-05	Antisense	-1.22239	N
ENSG00000250220.1	RP11-692D12.1	0.311911	0.000369764	0.00851175	Intergenic	1.47377	Y
ENSG00000250252.1	RP11-342A1.1	1.84319	9.81529e-17	5.13799e-14	Intergenic	NA	N
ENSG00000250258.1	CTC-431G16.2	0.682134	0.000854282	0.0152428	Antisense	NA	Y
ENSG00000250266.1	RP11-789C1.1	-0.870379	0.000689012	0.0131372	Intergenic	NA	Y
ENSG00000250295.5	RP11-434I12.2	0.583952	0.00166491	0.0241394	Antisense	NA	Y
ENSG00000250348.1	RP11-466P24.6	0.862025	0.000617429	0.0121517	Antisense	NA	N
ENSG00000250366.2	TUNAR	-1.40839	2.49674e-08	3.18468e-06	Intergenic	0.779304
ENSG00000250397.2	RP11-1391J7.1	0.316949	0.0117337	0.0861161	Antisense	-4.21726	Y
ENSG00000250413.1	RP11-448G15.1	0.526961	0.00799291	0.0675551	Antisense	-1.11704	Y
ENSG00000250421.4	RP11-83M16.6	0.757061	0.00066546	0.0128277	Intergenic	0.040642	Y
ENSG00000250451.4	HOXC-AS1	1.42968	1.6525e-09	2.78692e-07	Antisense	1.54649	Y
ENSG00000250509.1	CTC-573N18.1	-0.635301	0.0125576	0.0901031	Intergenic	NA	N
ENSG00000250608.1	RP11-933H2.4	0.572286	1.82302e-06	0.000128687	Antisense	-1.35576	Y
ENSG00000250614.1	AC007078.4	0.582159	0.00863975	0.0710264	Antisense	NA	Y
ENSG00000250616.2	RP11-455F5.3	0.232119	0.0069253	0.0617289	Antisense	0.506675	Y
ENSG00000250658.1	RP11-138B4.1	-0.692171	0.00276567	0.0339865	Intergenic	-1.29211	Y
ENSG00000250673.1	RP11-6L6.2	0.610114	0.00101878	0.017261	Intergenic	NA
ENSG00000250696.4	RP11-704M14.1	0.688833	0.00452899	0.0471949	Antisense	NA	N
ENSG00000250704.1	RP11-423J7.1	0.614249	3.85364e-07	3.47491e-05	Intergenic	NA	N
ENSG00000250740.1	RP11-710F7.2	0.442808	0.0125187	0.0899376	Antisense	0.860672	Y
ENSG00000250790.4	RP11-46H11.3	-0.298762	0.00218068	0.0289872	Antisense	0.552265	Y
ENSG00000250822.1	CTD-2139B15.4	0.683157	0.00269003	0.0334239	Intergenic	NA	N
ENSG00000250874.1	CTC-480C2.1	0.807922	0.000582461	0.0116512	Intergenic	-1.43715	N
ENSG00000250891.1	CTD-2281M20.1	0.630511	0.000584051	0.0116715	Intergenic	NA	Y
ENSG00000250900.5	CTC-338M12.6	0.445376	0.00459836	0.0475969	Antisense	-1.72293	Y
ENSG00000250903.7	GMDS-AS1	0.165382	0.00396745	0.0433142	Intergenic	-0.942092	Y
ENSG00000250910.6	AC097467.2	1.30632	5.66697e-12	1.63156e-09	Antisense	NA	Y
ENSG00000250917.1	RP4-785G19.5	0.471133	0.000399535	0.00899669	Exonic	-0.152003	Y
ENSG00000250948.1	RP11-1079K10.2	0.440521	0.0146902	0.0996135	Intergenic	NA	Y
ENSG00000250971.1	RP11-696F12.1	0.635731	0.00452243	0.0471631	Intergenic	NA	N
ENSG00000250988.6	SNHG21	0.214258	0.00747934	0.0647347	Antisense	-0.869832
ENSG00000250990.1	AC073635.5	0.408477	0.0055898	0.0540048	Antisense	NA	Y
ENSG00000251061.2	RP11-789C1.2	-0.600449	0.0144549	0.0986508	Intergenic	NA	N
ENSG00000251129.1	RP11-734I18.1	-0.628377	0.0131935	0.0929376	Intergenic	0.837585	N
ENSG00000251136.7	RP11-37B2.1	0.292346	0.00209109	0.0281892	Intergenic	-1.97737	Y
ENSG00000251218.1	RP11-1057B8.2	1.49584	2.92739e-09	4.77709e-07	Intergenic	NA	N
ENSG00000251221.1	LINC01337	0.521225	0.0142505	0.097894	Intergenic	-1.64062
ENSG00000251248.1	RP11-223C24.2	0.664447	0.00828193	0.0691998	Antisense	NA	N
ENSG00000251259.1	AC004069.2	0.45533	0.000881699	0.0155666	Intergenic	-2.22043	Y
ENSG00000251281.1	CTD-2066L21.2	0.815171	0.00121001	0.0194035	Intergenic	NA	N
ENSG00000251314.2	CTD-2337A12.1	0.326815	0.0129738	0.0919853	Antisense	-5.03342	Y
ENSG00000251321.1	PCAT4	0.694311	0.00383295	0.0423054	Intergenic	NA	Y
ENSG00000251330.3	CTD-2283N19.1	0.336184	0.00406526	0.0439534	Antisense	NA	Y
ENSG00000251364.5	CTD-2516F10.2	0.286805	0.0104028	0.0799136	Antisense	-1.93271	Y
ENSG00000251432.5	RP11-420A23.1	0.485812	0.000196314	0.00531061	Intergenic	-3.46636	Y
ENSG00000251455.1	RP11-164P12.3	0.628817	4.06997e-05	0.00160832	Antisense	-5.30603	Y
ENSG00000251497.2	RP11-197N18.7	-0.672108	0.00699928	0.062059	Antisense	NA	N
ENSG00000251574.5	RP11-6N13.1	0.762892	0.00105559	0.0176767	Intergenic	NA	N
ENSG00000251584.1	RP11-440I14.3	0.578152	0.0141989	0.0976482	Intergenic	NA	Y
ENSG00000251601.1	RP11-317O24.2	-0.68205	0.00771769	0.0661444	Intergenic	NA	N
ENSG00000251602.5	RP11-521B24.3	0.24157	0.00572464	0.0546655	Antisense	1.04052	Y
ENSG00000251623.1	RP11-826N14.4	1.24185	8.90367e-07	7.0785e-05	Intergenic	NA	Y
ENSG00000251661.3	RP11-326C3.11	0.863231	5.37787e-10	1.00843e-07	Antisense	-1.57066	Y
ENSG00000251687.1	RP11-181K12.2	1.32542	9.17798e-11	2.0552e-08	Antisense	1.66297	Y
ENSG00000251867.3	RP11-48B3.5	0.378162	2.63762e-05	0.00113584	Antisense	0.0390803
ENSG00000253102.1	RP1-117B12.4	-0.374662	0.0117049	0.085983	Antisense	1.36299
ENSG00000253138.4	LINC00967	1.17359	1.45163e-06	0.000107626	Intergenic	-2.58496	N
ENSG00000253167.1	KIAA0196-AS1	0.526633	0.000291503	0.00715133	Antisense	NA	Y
ENSG00000253177.1	RP11-100L22.1	0.716439	0.000856408	0.0152672	Intergenic	NA	Y
ENSG00000253214.1	RP11-1149M10.2	0.638543	0.00137642	0.0210868	Intergenic	NA	Y
ENSG00000253284.2	RP11-282K24.3	0.535481	0.00114464	0.0186934	Intronic	-2.90108	Y
ENSG00000253317.1	RP11-142A23.1	0.727801	0.0043846	0.0461919	Intergenic	NA	N
ENSG00000253320.4	KB-1507C5.2	0.409905	2.56367e-06	0.000172223	Antisense	0.78295
ENSG00000253363.4	RP11-962G15.1	0.762157	2.38379e-05	0.00105239	Intergenic	2.11215	N
ENSG00000253369.1	RP11-1081M5.1	0.829536	0.000694124	0.0131972	Intergenic	-1.32193	Y
ENSG00000253372.4	RP11-44N11.1	0.502843	0.00120036	0.0192991	Intronic	NA	Y
ENSG00000253379.4	RP11-1102P16.1	-0.370237	0.0121804	0.0882855	Intergenic	-1.18057
ENSG00000253404.1	AC034243.1	0.495049	0.00348666	0.0396661	Antisense	2.66783	Y
ENSG00000253405.1	EVX1-AS	0.44485	0.0123552	0.0891798	Antisense	NA	Y
ENSG00000253417.4	RP11-109J4.1	-0.653437	0.0108129	0.0818416	Intergenic	-0.17585	N
ENSG00000253438.2	PCAT1	1.0358	1.59629e-08	2.19931e-06	Intergenic	-2.00323	Y
ENSG00000253475.1	RP11-110G21.2	1.0141	3.48099e-05	0.00141869	Intronic	NA	Y
ENSG00000253500.4	AF121898.3	1.30054	1.16321e-07	1.25699e-05	Antisense	1.08755	N
ENSG00000253535.4	RP11-624C23.1	0.580351	0.0042722	0.0453873	Antisense	NA	Y
ENSG00000253576.1	GS1-5L10.1	-0.721723	0.00407274	0.0439915	Antisense	NA	N
ENSG00000253593.2	RP11-157E21.1	0.637729	0.0109745	0.0825722	Intergenic	NA	N
ENSG00000253664.1	RP11-401H2.1	0.698983	5.90115e-07	5.00753e-05	Antisense	NA	N
ENSG00000253665.1	RP11-359E19.2	0.885995	0.000111658	0.00344345	Intergenic	NA	Y
ENSG00000253669.3	KB-1732A1.1	0.399147	0.000783521	0.0143828	Intergenic	1.37127	Y
ENSG00000253671.1	RP11-806O11.1	0.524701	0.000111275	0.00343658	Intergenic	-3.12658	Y
ENSG00000253704.1	RP11-267M23.4	0.357219	0.000810323	0.0146926	Intergenic	-0.235835	Y
ENSG00000253764.1	RP11-439C15.4	0.433161	0.00876977	0.0716418	Antisense	-2.28758	Y
ENSG00000253768.1	CTB-33O18.1	0.572266	0.0141583	0.0974518	Intergenic	1.22921	Y
ENSG00000253802.1	CTA-392C11.1	1.09007	2.01909e-05	0.00093544	Intergenic	-0.523586	N
ENSG00000253824.1	KB-173C10.2	-0.666618	0.00732295	0.0638479	Intronic	NA	N
ENSG00000253838.1	RP11-44K6.2	0.795616	0.000889975	0.0156153	Intronic	NA	N
ENSG00000253852.1	CTB-140J7.2	0.655686	0.0013442	0.0207827	Antisense	NA	N
ENSG00000253878.4	RP11-347C18.3	0.340308	0.00286055	0.0346962	Intronic	-0.683199	Y
ENSG00000253893.2	FAM85B	1.43688	3.32713e-17	1.81225e-14	Intergenic	-1.05996	Y
ENSG00000253939.1	RP11-44K6.3	1.17958	1.47758e-06	0.000108879	Antisense	NA	N
ENSG00000253955.1	CTB-33O18.3	2.94631	1.53743e-67	6.88546e-64	Intergenic	-3.21604	Y
ENSG00000253972.4	RP11-4K16.2	0.793616	2.46145e-06	0.000166746	Antisense	NA	Y
ENSG00000253978.1	CTB-178M22.2	0.356546	0.00227328	0.0297594	Antisense	-1.13418	Y
ENSG00000254018.1	RP11-785H20.1	1.10268	2.38791e-08	3.08493e-06	Intergenic	NA	N
ENSG00000254024.1	KB-1562D12.1	0.437895	0.00116111	0.0188562	Antisense	-0.159882	Y
ENSG00000254035.1	RP11-281O15.4	-0.447134	0.00207829	0.0280823	Antisense	-2.32193	Y
ENSG00000254057.1	RP3-388N13.3	0.582641	0.00421856	0.0449954	Intergenic	0	Y
ENSG00000254139.1	CTD-2339F6.1	1.3243	2.3469e-08	3.04169e-06	Intergenic	NA	Y
ENSG00000254153.1	CTA-398F10.2	0.73825	9.29042e-06	0.000492075	Intergenic	3.75489	Y
ENSG00000254154.7	RP4-798P15.3	0.59283	9.84109e-05	0.0031111	Exonic	-2.57346	Y
ENSG00000254165.1	RP11-503E24.2	0.412708	0.00203476	0.0277012	Intronic	-2.72457	Y
ENSG00000254205.1	RP11-92K15.1	0.60243	0.00637785	0.0588266	Antisense	NA	Y
ENSG00000254224.1	KB-1043D8.6	0.480695	0.00662346	0.0599667	Antisense	NA	Y
ENSG00000254231.1	CTD-2284J15.1	0.601147	1.1351e-05	0.000578415	Antisense	-1.53378	Y
ENSG00000254248.1	RP11-320N21.2	0.645389	0.00398875	0.0434296	Antisense	NA	Y
ENSG00000254258.1	RP11-398H6.1	0.708123	0.00455486	0.047391	Intergenic	-0.85022	Y
ENSG00000254266.4	RP11-594N15.2	0.523677	0.000158185	0.00448696	Antisense	NA	Y
ENSG00000254269.4	CTD-2281E23.2	0.595288	0.0114471	0.0848623	Intergenic	NA	N
ENSG00000254275.5	LINC00824	0.964552	1.6728e-05	0.000796991	Intergenic	-0.906133
ENSG00000254281.1	KB-1507C5.4	0.442501	0.000484701	0.0103424	Intergenic	NA	Y
ENSG00000254287.1	RP11-44K6.4	0.668329	0.00513358	0.0510281	Antisense	NA	N
ENSG00000254290.1	RP11-150O12.3	-0.605651	0.00106695	0.017807	Intergenic	-0.699307	Y
ENSG00000254317.1	RP11-473O4.5	0.446315	0.00397152	0.0433352	Antisense	-1	Y
ENSG00000254349.4	FLJ39080	0.757556	0.00114186	0.0186714	Intergenic	2.39232
ENSG00000254419.1	RP11-261P9.4	0.489966	0.00242791	0.031206	Intronic	-4.60829	Y
ENSG00000254433.1	RP11-677I18.3	0.414481	0.000792409	0.0144851	Antisense	NA	Y
ENSG00000254458.1	RP11-867G23.13	0.609173	0.00877933	0.0716418	Antisense	NA	N
ENSG00000254461.1	RP11-755F10.3	0.393109	0.0030977	0.0366048	Antisense	-2.45943	Y
ENSG00000254485.4	RP11-380O24.1	0.460099	2.66743e-05	0.00114622	Exonic	1.02031	Y
ENSG00000254556.1	AF131215.4	0.545389	0.0105993	0.080853	Intronic	-1.06413	Y
ENSG00000254638.1	RP11-356J5.4	0.756409	0.00229996	0.029982	Antisense	NA	N
ENSG00000254653.1	RP11-702F3.1	0.625198	0.00918006	0.0737093	Antisense	NA	N
ENSG00000254654.1	AC068858.1	0.663894	0.00672192	0.0605048	Intergenic	NA	N
ENSG00000254676.1	RP11-727A23.4	0.31274	0.0125199	0.0899376	Exonic	-3.75426	Y
ENSG00000254682.1	RP11-660L16.2	-0.633099	4.08987e-08	4.93564e-06	Antisense	1.0717	Y
ENSG00000254689.1	RP11-354A14.1	0.709766	1.37525e-05	0.000671094	Intergenic	NA	Y
ENSG00000254756.1	RP11-867G23.12	0.642829	0.00107153	0.0178546	Antisense	NA	N
ENSG00000254757.1	RP13-726E6.1	0.525525	0.00212428	0.0284653	Intergenic	NA	Y
ENSG00000254777.4	AC022182.1	0.459321	0.00576223	0.0548555	Intergenic	-0.552541	Y
ENSG00000254802.1	AC022182.3	0.445476	0.0119854	0.0874215	Intergenic	NA	Y
ENSG00000254815.4	RP11-496I9.1	0.488974	0.00400375	0.0435336	Antisense	-4.5641
ENSG00000254833.1	RP11-50B3.2	0.58958	0.00227252	0.0297591	Intergenic	NA	Y
ENSG00000254854.1	CTD-2523D13.2	0.533127	4.70478e-06	0.000283038	Intergenic	0.760363	Y
ENSG00000254860.4	TMEM9B-AS1	0.442413	1.34558e-05	0.000660611	Antisense	-0.676256	Y
ENSG00000254862.4	RP11-159H22.2	0.336902	0.00152075	0.0226689	Antisense	0.584962	Y
ENSG00000254951.6	RP11-494M8.4	-0.541933	0.00955567	0.0754331	Intronic	-1.94741	Y
ENSG00000254952.1	AP001257.1	0.874367	0.000350452	0.00819998	Intergenic	NA	N
ENSG00000254967.5	RP11-680F20.6	-0.68325	0.00168849	0.0243848	Antisense	-1.32193	Y
ENSG00000254973.1	RP11-429J17.7	1.0956	6.30884e-18	3.73956e-15	Intergenic	-0.796358	Y
ENSG00000254988.1	CTD-2547H18.1	-1.10984	1.71026e-06	0.000122192	Antisense	NA	Y
ENSG00000254990.4	RP11-108O10.2	0.966879	4.94686e-10	9.54035e-08	Intergenic	0	Y
ENSG00000255002.1	CTD-2509G16.2	0.599177	0.0140214	0.0968406	Intergenic	NA	N
ENSG00000255031.4	RP11-802E16.3	0.469005	0.000571058	0.0114973	Exonic	-4.38502	Y
ENSG00000255036.4	RP11-23J9.4	0.557726	6.69254e-06	0.000377281	Exonic	-2.47899
ENSG00000255050.1	RP11-661A12.9	0.617827	0.00359224	0.0405127	Antisense	NA	Y
ENSG00000255080.1	RP11-1082L8.3	-0.487434	0.0083194	0.06938	Intergenic	NA	Y
ENSG00000255089.1	RP11-326C3.10	0.887965	0.00037929	0.00865197	Antisense	1.74187	Y
ENSG00000255109.4	CTD-2572N17.1	0.685062	0.0073435	0.0639849	Intergenic	NA	N
ENSG00000255159.1	RP11-318C2.1	0.703322	0.000652455	0.0126319	Antisense	NA	Y
ENSG00000255176.1	AP002954.3	0.521857	0.0021145	0.0283718	Intronic	-4.38596	Y
ENSG00000255182.2	CTD-2517M22.14	0.627089	4.94766e-05	0.00186205	Antisense	-3.63392	Y
ENSG00000255246.1	RP11-179A16.2	0.928653	0.000169971	0.00475766	Intergenic	NA	N
ENSG00000255250.1	CTD-2005H7.2	0.497485	0.0013457	0.020798	Intergenic	NA	Y
ENSG00000255299.4	RP11-655C2.3	0.901479	0.000123267	0.00371581	Intergenic	-0.741082	N
ENSG00000255451.1	RP11-58K22.1	0.46028	8.43942e-06	0.000452953	Intergenic	NA	N
ENSG00000255479.1	RP11-672A2.6	0.63271	0.00487849	0.0493815	Intergenic	NA	N
ENSG00000255495.1	AC145124.2	-0.550671	0.000240521	0.00619073	Intergenic	-0.351924
ENSG00000255693.1	RP11-766N7.3	0.682332	1.81999e-05	0.000858744	Intergenic	-0.847997	Y
ENSG00000255717.5	SNHG1	0.395095	4.96698e-05	0.00186758	Intergenic	-2.56578	Y
ENSG00000255857.4	PXN-AS1	0.335145	6.1478e-05	0.00218711	Antisense	0.248477	Y
ENSG00000255928.1	RP11-456I15.2	0.970541	0.000119963	0.00363616	Antisense	NA	N
ENSG00000256006.1	AC084117.3	0.486547	0.00517598	0.0512969	Intronic	NA	Y
ENSG00000256031.1	RP11-364C11.3	0.64189	0.0120755	0.0877775	Intronic	NA	N
ENSG00000256039.1	RP11-291B21.2	0.632746	0.00159802	0.0235415	Intergenic	2.16992	Y
ENSG00000256128.4	LINC00944	0.878032	1.88437e-06	0.000132554	Intergenic	NA	Y
ENSG00000256150.1	RP11-885B4.1	0.819289	0.0011342	0.0186217	Intergenic	NA	Y
ENSG00000256250.1	RP11-989F5.1	0.87405	0.000102334	0.00321745	Antisense	NA	N
ENSG00000256257.1	CACNA1C-IT2	-0.605951	0.00876334	0.0716188	Intronic	NA	Y
ENSG00000256276.1	RP5-916L7.2	0.593933	0.0023287	0.0302588	Intergenic	NA	Y
ENSG00000256299.1	RP11-989F5.3	1.11329	3.45571e-06	0.000218665	Intronic	NA	Y
ENSG00000256321.4	RP11-153K16.1	3.22759	1.79603e-36	4.25839e-33	Intergenic	-2.86507	N
ENSG00000256427.1	RP11-118B22.4	0.505721	0.0111439	0.0834901	Intergenic	NA	Y
ENSG00000256433.2	RP1-102E24.8	0.515973	1.96586e-05	0.000916045	Intergenic	-3.06847	Y
ENSG00000256458.1	RP11-363J17.1	0.607153	0.0111708	0.0836035	Antisense	NA	Y
ENSG00000256481.1	RP11-21A7A.4	0.706738	0.000357318	0.00832028	Antisense	NA	Y
ENSG00000256576.2	RP13-977J11.2	0.316197	0.00466648	0.0480608	Intergenic	-0.633947	Y
ENSG00000256582.1	RP11-75L1.1	0.996592	2.22962e-05	0.00100252	Intergenic	NA	N
ENSG00000256597.2	FLJ37505	1.06798	4.88083e-06	0.000291454	Intergenic	NA
ENSG00000256670.1	RP11-338E21.1	0.538429	0.00861475	0.0709302	Intergenic	NA	Y
ENSG00000256751.4	PLBD1-AS1	-0.485272	0.00612875	0.0572893	Antisense	-1.16046
ENSG00000256894.1	RP11-283G6.3	-0.46679	0.0017356	0.0248233	Antisense	-2.34496	Y
ENSG00000256940.1	RP11-783K16.5	-0.331955	0.0131997	0.0929385	Antisense	1.89833	Y
ENSG00000256948.1	RP11-598F7.3	0.858771	1.22794e-05	0.000614079	Antisense	-0.160964	Y
ENSG00000256967.1	RP11-273B20.1	0.332433	0.00755426	0.0651278	Antisense	-2.90527	Y
ENSG00000256982.1	CTD-2555A7.2	0.634597	0.000149366	0.00430959	Intergenic	-0.684617	Y
ENSG00000257002.1	AP000438.2	0.563512	0.000109592	0.00339622	Antisense	-0.221059	Y
ENSG00000257022.1	RP11-729I10.2	-0.667075	0.00930302	0.0743311	Antisense	NA	N
ENSG00000257038.1	RP11-800A3.7	-0.320068	0.00482174	0.0489546	Antisense	-1.21596	Y
ENSG00000257057.1	C11orf97	-0.641151	0.0122778	0.0887442	Intergenic	NA
ENSG00000257135.4	RP11-320M2.1	0.583428	1.79743e-06	0.000127103	Intergenic	-0.363427	Y
ENSG00000257176.2	RP11-996F15.2	0.786018	2.19888e-10	4.55999e-08	Antisense	-2.7031	Y
ENSG00000257178.3	RP11-357H14.16	0.778827	0.00130984	0.0204264	Exonic	-4.60134
ENSG00000257194.2	RP11-567C2.1	0.629261	0.00151672	0.0226257	Intergenic	NA	Y
ENSG00000257222.1	RP11-554E23.4	0.453884	0.000649363	0.0125982	Antisense	NA	Y
ENSG00000257252.4	RP11-486A14.2	0.450077	0.00785602	0.0668608	Intergenic	-0.0468047	Y
ENSG00000257261.4	RP11-96H19.1	-0.298521	0.000899547	0.0157097	Antisense	-2.21642	Y
ENSG00000257322.4	RP11-511B23.2	0.586587	0.000904792	0.015774	Intergenic	-0.0349903	Y
ENSG00000257354.2	RP11-631N16.2	0.297312	0.00408593	0.0440235	Intergenic	-3.24484	Y
ENSG00000257379.1	RP11-793H13.8	0.498925	0.000140657	0.00412025	Exonic	-2.95321
ENSG00000257407.1	RP11-1028N23.4	0.589911	0.0136872	0.0953	Intergenic	NA	N
ENSG00000257434.1	RP11-81K13.1	-1.02169	5.13874e-06	0.000302817	Antisense	NA	Y
ENSG00000257453.1	RP11-290L1.3	0.602063	0.00636448	0.058751	Antisense	-1.70044
ENSG00000257495.4	KRT73-AS1	0.923692	0.000236037	0.00610652	Antisense	-2.53605
ENSG00000257524.4	RP11-203J24.9	0.371092	0.00776185	0.0663395	Exonic	-3.7926
ENSG00000257550.1	RP11-793H13.3	0.880744	4.34891e-06	0.000264463	Antisense	NA
ENSG00000257595.2	RP3-473L9.4	0.560522	0.00130825	0.0204148	Intergenic	3.53492	Y
ENSG00000257596.1	RP11-968A15.2	0.487031	0.000894956	0.0156633	Antisense	NA	Y
ENSG00000257599.1	OVCH1-AS1	-0.734904	0.00156006	0.0231267	Antisense	0.405992
ENSG00000257613.1	LINC01481	0.564127	5.9385e-05	0.00213336	Intergenic	-2.9542
ENSG00000257621.6	PSMA3-AS1	0.171521	0.00526745	0.0518615	Exonic	-1.42347
ENSG00000257636.5	RP11-1103G16.1	1.16586	3.17866e-06	0.000205324	Antisense	0.348154	N
ENSG00000257663.1	RP11-1100L3.7	0.702315	0.000538636	0.0110662	Antisense	-0.859822	N
ENSG00000257698.1	RP11-620J15.3	0.266296	0.00398966	0.0434296	Intergenic	1.68729	Y
ENSG00000257718.1	RP11-396F22.1	0.56415	0.000771035	0.0142495	Antisense	1.74584	Y
ENSG00000257726.1	RP11-116D17.1	0.606429	0.0098387	0.076899	Intergenic	NA
ENSG00000257737.1	RP11-341G23.2	-0.61963	0.0144438	0.0986253	Antisense	NA	N
ENSG00000257769.1	CTB-193M12.1	0.683658	0.00385192	0.0424478	Antisense	NA	N
ENSG00000257781.1	RP11-110L15.1	0.45253	0.0048351	0.0490285	Intergenic	NA	Y
ENSG00000257817.1	RP4-601P9.2	0.545229	0.000994549	0.0169502	Intergenic	0.447459	Y
ENSG00000257859.1	CASC18	0.400992	0.014361	0.0982791	Intergenic	-3.05817
ENSG00000257890.1	RP11-114F10.2	0.532733	0.00834261	0.0695338	Intergenic	NA	Y
ENSG00000257894.2	RP1-78O14.1	-0.39457	0.00285456	0.0346592	Antisense	-0.922508	Y
ENSG00000258038.4	CTD-2384A14.1	1.16251	5.47948e-06	0.000319626	Intergenic	-1.75422	N
ENSG00000258144.1	RP11-554L12.1	1.31053	1.97294e-08	2.63322e-06	Intergenic	NA	Y
ENSG00000258203.4	RP1-228P16.3	-0.675667	0.00589414	0.0557367	Intergenic	NA	Y
ENSG00000258294.4	RP11-314D7.1	0.745196	0.00101955	0.0172667	Intergenic	NA	Y
ENSG00000258302.2	RP11-981P6.1	0.306034	0.0126396	0.0904431	Antisense	-2.8413	Y
ENSG00000258317.1	RP11-603J24.5	0.501815	0.000337994	0.00800912	Antisense	-1.57923	Y
ENSG00000258331.1	RP11-118A3.1	0.795489	0.0018713	0.0261625	Intergenic	NA	N
ENSG00000258345.1	RP11-603J24.6	0.625818	0.0144342	0.0985937	Antisense	NA	N
ENSG00000258365.1	RP11-1105G2.3	0.618867	6.94509e-06	0.000389341	Antisense	-2.77808
ENSG00000258380.1	RP11-33N16.2	0.615985	0.0120379	0.0876054	Antisense	NA	N
ENSG00000258443.1	RP3-414A15.11	0.357899	0.00440048	0.0463012	Intronic	NA	Y
ENSG00000258461.4	RP11-164J13.1	0.364489	0.00969297	0.0760995	Exonic	-3.89514	N
ENSG00000258490.1	RP11-862P13.1	0.61034	0.0127194	0.0908	Antisense	NA	N
ENSG00000258525.1	RP11-829H16.3	-0.561507	0.00102046	0.0172749	Antisense	-5.00298	Y
ENSG00000258545.4	RP4-755D9.1	0.603295	4.6572e-05	0.00178269	Antisense	-0.111595	Y
ENSG00000258602.1	RP11-7F17.7	0.726053	0.000627905	0.0123038	Intergenic	0.111893	Y
ENSG00000258603.3	RP3-414A15.10	0.37267	0.0136319	0.0950956	Antisense	-0.334127	Y
ENSG00000258630.1	RP11-725G5.2	0.454996	0.00273491	0.0336907	Intergenic	-1	Y
ENSG00000258647.4	LINC00930	1.21371	3.20986e-11	7.889e-09	Intergenic	-4.16993	Y
ENSG00000258676.4	RP11-386M24.3	0.82499	1.81038e-05	0.000856469	Intergenic	NA	Y
ENSG00000258693.1	RP11-436M15.3	0.71633	0.00505753	0.0504757	Antisense	NA	N
ENSG00000258701.1	LINC00638	-0.326946	0.00217255	0.0289198	Intergenic	0.0275019	Y
ENSG00000258725.1	PRC1-AS1	0.719577	1.73683e-08	2.36508e-06	Antisense	-3.34239	Y
ENSG00000258727.1	RP11-66N24.3	0.543037	8.19205e-05	0.00271991	Antisense	-5.00253
ENSG00000258730.1	ITPK1-AS1	0.668032	0.00223956	0.0294999	Antisense	NA	N
ENSG00000258733.4	CTD-2341M24.1	0.427815	0.00282221	0.0344086	Intergenic	-0.324663	Y
ENSG00000258738.1	RP11-73E17.2	-0.236096	0.000146086	0.00423313	Antisense	0.642199
ENSG00000258789.1	RP11-507K2.3	-0.444999	0.000231244	0.00601338	Antisense	1.5692	Y
ENSG00000258793.1	RP11-404P21.3	0.810619	0.000772488	0.0142614	Antisense	0.847997	N
ENSG00000258819.1	RP11-7F17.3	-0.457297	0.00458203	0.047551	Intergenic	-1.52998	Y
ENSG00000258829.1	CTD-2243E23.1	0.968207	2.62148e-05	0.0011301	Antisense	NA	Y
ENSG00000258847.1	CTD-2014B16.3	0.555408	0.00032507	0.0077759	Intergenic	NA
ENSG00000258875.4	CTD-2547L24.3	0.547347	6.53892e-05	0.0022859	Antisense	-1.20261
ENSG00000258884.1	CTD-3035D6.2	0.975135	6.94374e-07	5.71187e-05	Intergenic	2.6231	Y
ENSG00000258904.1	RP11-638I2.2	0.394979	0.00653494	0.0595936	Intronic	-2.80735	Y
ENSG00000258926.1	RP11-47I22.1	0.431059	0.013612	0.0949731	Antisense	NA	Y
ENSG00000258957.1	RP11-363J20.1	0.335472	0.00292492	0.0352135	Antisense	2.32604	Y
ENSG00000258998.1	RP11-398E10.1	-0.943553	5.66223e-05	0.00207103	Intergenic	-0.184425	Y
ENSG00000259023.2	LINC00524	-0.534088	0.0117013	0.085983	Intergenic	NA	Y
ENSG00000259065.1	RP5-1021I20.1	-0.424621	0.000124549	0.00372971	Antisense	-0.0260681	Y
ENSG00000259081.1	RP11-488C13.6	0.415157	0.00343627	0.0393147	Antisense	-2.9014	Y
ENSG00000259083.1	RP11-407N17.4	0.329723	0.00556226	0.0538032	Antisense	-1.71049	Y
ENSG00000259113.1	RP11-406H23.2	0.520926	0.00213342	0.0284965	Antisense	NA
ENSG00000259163.1	RP11-1078H9.5	0.473311	0.00355664	0.0402294	Antisense	NA	Y
ENSG00000259188.4	CTD-2647E9.3	0.592221	0.00863836	0.0710264	Antisense	NA	N
ENSG00000259238.1	RP11-361D15.2	0.607325	0.000117822	0.00359232	Antisense	NA	Y
ENSG00000259268.1	AC007950.1	0.73749	0.000747478	0.0139226	Intergenic	NA	Y
ENSG00000259314.1	CTD-3065B20.3	0.491085	0.000203588	0.00543862	Antisense	-0.447459	N
ENSG00000259321.1	RP11-468E2.5	0.381625	0.00196315	0.0270619	Antisense	-3.04444
ENSG00000259365.1	RP11-424I19.1	0.997762	6.67452e-05	0.00232524	Intergenic	NA	N
ENSG00000259402.1	RP11-30K9.4	0.588272	0.00367295	0.0410782	Intronic	-2.89851	Y
ENSG00000259407.1	RP11-158M2.3	0.466126	9.79919e-05	0.00310272	Antisense	-2.3676	Y
ENSG00000259408.2	RP11-3D4.3	0.355434	0.00508022	0.0506014	Antisense	-2.67037	Y
ENSG00000259416.2	RP11-158M2.5	0.600347	9.72672e-05	0.00309192	Intergenic	-1.80045	Y
ENSG00000259420.4	RP11-307C19.2	-0.589676	0.0054619	0.0532027	Intergenic	-1.74271	Y
ENSG00000259423.2	RP11-265N7.2	0.579471	0.00618655	0.0576025	Intergenic	NA	Y
ENSG00000259444.1	RP11-736N17.8	0.592763	0.0108339	0.0819294	Intergenic	NA	Y
ENSG00000259446.4	RP11-489D6.2	-0.857798	7.00264e-05	0.00241244	Intergenic	NA	Y
ENSG00000259459.4	RP11-321G12.1	0.786411	2.97959e-06	0.00019402	Intergenic	-0.533213	Y
ENSG00000259471.1	LINC01169	0.711935	0.000793151	0.0144921	Intergenic	0.0815691
ENSG00000259474.1	RP11-650L12.1	0.563657	0.0134292	0.0940719	Antisense	NA	N
ENSG00000259495.2	RP11-210M15.2	-0.311946	0.00766568	0.0658105	Intergenic	-0.159245
ENSG00000259515.1	RP11-365N19.2	0.374259	0.00650178	0.0593987	Exonic	NA	Y
ENSG00000259532.1	RP11-138H8.2	0.564739	0.0107531	0.0815936	Antisense	NA	N
ENSG00000259536.4	RP11-111A22.1	0.45984	5.69526e-06	0.000327473	Antisense	-0.0324215	Y
ENSG00000259543.1	CTD-2034I4.1	0.692445	0.00673971	0.0605837	Intergenic	NA	N
ENSG00000259546.1	RP11-351M8.2	0.550413	0.00142047	0.0216138	Exonic	NA
ENSG00000259561.1	RP11-300G22.2	0.739433	8.37521e-05	0.00276532	Intronic	NA	Y
ENSG00000259587.2	RP11-463I20.2	0.676002	0.00737859	0.0641244	Intergenic	NA	N
ENSG00000259594.4	CTD-2034I4.2	0.989585	2.83465e-07	2.69472e-05	Intergenic	-2.22239	Y
ENSG00000259604.4	RP11-66B24.1	2.06815	1.32233e-29	2.13197e-26	Intergenic	NA	Y
ENSG00000259605.3	AC074212.5	0.361405	0.0108142	0.0818416	Antisense	-4.1631
ENSG00000259628.1	RP11-467H10.2	0.508826	0.00433795	0.0457881	Exonic	NA	Y
ENSG00000259635.1	AC100830.3	0.33338	0.00908907	0.0732707	Antisense	-3.26707	Y
ENSG00000259641.4	PCAT29	0.411878	0.00451565	0.0471168	Intergenic	NA
ENSG00000259654.1	RP11-245C17.2	0.526387	0.00470943	0.0482757	Antisense	NA	Y
ENSG00000259656.1	RP11-325E5.1	-0.795478	0.00047832	0.0102442	Intergenic	NA	Y
ENSG00000259685.2	CTD-2315E11.1	0.739636	1.06955e-05	0.000549175	Intergenic	NA	Y
ENSG00000259737.5	RP11-475A13.1	0.682297	0.00120422	0.0193458	Intergenic	NA	Y
ENSG00000259756.1	RP11-625H11.2	0.793209	0.00190378	0.0265039	Antisense	NA	N
ENSG00000259767.1	RP11-90B9.2	0.44731	0.00409774	0.044127	Intronic	NA	Y
ENSG00000259780.3	RP11-304L19.12	0.621934	0.00250897	0.0319299	Antisense	-2.59975
ENSG00000259782.2	CTD-2270L9.2	0.434409	0.0137291	0.0955255	Intronic	-1.02385	Y
ENSG00000259820.1	AC083843.1	0.540365	1.81892e-05	0.000858744	Intergenic	-4.31679	Y
ENSG00000259826.1	RP11-467D6.1	0.252929	0.00391971	0.0429209	Intergenic	-1.1136	Y
ENSG00000259865.1	RP11-488L18.10	0.326183	0.00089722	0.0156827	Intergenic	-1.43157	Y
ENSG00000259869.1	AL022344.7	0.433657	0.0146325	0.099392	Intergenic	2.37851	Y
ENSG00000259883.1	EHD4-AS1	0.425292	0.00382767	0.0422921	Antisense	-1.58496
ENSG00000259926.1	RP11-44F14.5	0.555647	0.00515591	0.0511744	Intronic	NA	Y
ENSG00000259937.2	RP11-438D14.2	-0.791066	0.000772743	0.0142614	Intronic	0.78778	Y
ENSG00000259940.2	CTD-3203P2.1	0.334671	0.00247052	0.0315824	Antisense	-2.42742
ENSG00000259943.1	RP1-39G22.7	0.247793	0.000286674	0.00706293	Intergenic	0.101326	Y
ENSG00000259947.1	XX-DJ76P10__A.2	0.834238	0.000633171	0.012395	Intergenic	NA	N
ENSG00000259974.2	LINC00261	-0.871297	0.000283976	0.00701363	Intergenic	-0.319617	Y
ENSG00000259976.1	RP11-553L6.5	-0.234812	0.00407919	0.0439915	Intergenic	-1.56684
ENSG00000260005.5	AC027601.1	0.409205	0.000896611	0.0156788	Antisense	NA	Y
ENSG00000260011.2	RP13-20L14.1	0.697754	3.12905e-05	0.00130158	Intergenic	NA	Y
ENSG00000260017.1	RP11-1035H13.2	0.518968	0.00430429	0.0455841	Antisense	NA	N
ENSG00000260022.1	LA16c-306A4.1	0.453947	9.65364e-05	0.00307596	Antisense	NA	Y
ENSG00000260057.4	LINC01571	-0.674372	0.00749339	0.0647996	Intergenic	NA
ENSG00000260064.1	RP11-18F14.4	0.496068	0.0118386	0.0867047	Intronic	-4.59991	Y
ENSG00000260077.1	RP11-254F7.2	-0.320737	0.00039087	0.00885599	Intergenic	-0.793956	Y
ENSG00000260083.1	MIR762HG	0.244107	0.00304335	0.0361671	Antisense	1.22365
ENSG00000260088.1	RP11-92G12.3	0.714378	9.21399e-05	0.00296399	Antisense	1.00652	Y
ENSG00000260118.1	RP6-201G10.2	0.925706	4.57503e-15	2.00441e-12	Intergenic	-1.21063	Y
ENSG00000260121.1	RP5-1142A6.9	0.421089	0.00123894	0.0196762	Antisense	-2.91954
ENSG00000260136.4	CTD-2270L9.4	0.327331	0.00064808	0.0125829	Antisense	1.98999	Y
ENSG00000260145.1	RP11-322D14.2	0.54778	0.0124856	0.0898462	Antisense	NA	N
ENSG00000260166.1	RP11-863P13.6	-0.786487	0.00221909	0.0293008	Intronic	NA	N
ENSG00000260179.1	RP5-902P8.12	0.417585	0.00394614	0.0431677	Intergenic	-4.13789	Y
ENSG00000260185.1	RP11-432I5.6	0.698157	0.00174575	0.0248994	Antisense	NA	N
ENSG00000260186.4	RP11-481J2.2	-0.536515	0.0137624	0.0956863	Intergenic	-1.70044	Y
ENSG00000260197.1	RP11-424G14.1	0.251768	0.0100795	0.0780993	Intergenic	-1.19845	Y
ENSG00000260228.4	RP11-483P21.2	-0.472385	0.0062729	0.0582317	Antisense	2.00379	Y
ENSG00000260233.3	SSSCA1-AS1	0.215443	0.00882125	0.071888	Intergenic	-0.946209	Y
ENSG00000260236.1	RP11-708J19.1	0.278916	0.00561573	0.0541256	Intergenic	-0.36874	Y
ENSG00000260244.1	RP11-588K22.2	-0.358513	0.000378103	0.00863956	Intergenic	-0.989174
ENSG00000260246.1	AC000032.2	1.00681	7.84948e-05	0.00264098	Antisense	NA
ENSG00000260261.1	RP11-480A16.1	0.375018	0.0044534	0.0466835	Intergenic	-4.21538	Y
ENSG00000260265.1	RP11-44F21.5	-0.552852	0.00665361	0.0601393	Intergenic	1.5455	Y
ENSG00000260276.2	RP11-77H9.2	0.362291	3.69639e-05	0.00149439	Exonic	-0.488314	Y
ENSG00000260306.1	RP11-645C24.5	-0.750475	1.62707e-05	0.000780741	Intergenic	-2.97536	Y
ENSG00000260316.2	LA16c-306A4.2	0.519851	0.00103281	0.0174037	Intronic	-3.6168	Y
ENSG00000260317.1	RP11-48B3.4	0.381489	0.00055257	0.0112601	Intergenic	-1.68418	Y
ENSG00000260337.3	RP11-386M24.6	1.02203	3.34968e-10	6.68394e-08	Intergenic	-4.16358	Y
ENSG00000260339.1	HEXA-AS1	-0.458504	0.0052245	0.0515545	Antisense	-0.615649
ENSG00000260361.1	CTD-2313J17.5	0.376126	0.00109087	0.0180945	Intronic	-2.18659	Y
ENSG00000260368.1	RP11-521I2.3	0.537283	0.000476607	0.0102358	Intergenic	-2.72295	Y
ENSG00000260394.2	LA16c-313D11.9	0.477386	0.00193453	0.0267955	Antisense	-1.25381	Y
ENSG00000260423.1	RP13-735L24.1	0.411247	0.011732	0.0861161	Intergenic	-4.27782	Y
ENSG00000260426.1	RP5-912I13.1	-0.971787	0.000142521	0.00415373	Intergenic	NA	Y
ENSG00000260448.4	LCMT1-AS1	0.624685	8.63617e-08	9.69633e-06	Intergenic	1.37717
ENSG00000260460.1	RP11-284F21.8	0.581539	0.00843739	0.0700774	Intergenic	NA	Y
ENSG00000260475.1	RP11-85A1.3	0.385693	0.0060451	0.0567443	Intergenic	-1.74963	Y
ENSG00000260484.1	RP11-1081M5.2	1.20244	5.18798e-07	4.48738e-05	Intergenic	NA	Y
ENSG00000260493.1	RP11-219B4.7	0.565312	0.000406355	0.0091146	Intergenic	-1.33736	Y
ENSG00000260500.1	CTD-3193O13.1	0.550846	7.32914e-05	0.00249717	Antisense	-1.5725
ENSG00000260519.1	RP11-109E24.2	0.349433	0.0114642	0.0849268	Intergenic	NA	Y
ENSG00000260565.5	CTD-2270P14.1	0.361973	0.000640269	0.0124794	Intergenic	-3.29245
ENSG00000260581.1	CTB-113P19.4	0.67456	0.000877968	0.0155144	Intergenic	NA	Y
ENSG00000260599.1	CTC-457E21.1	0.626638	0.0143422	0.0982052	Intronic	NA	N
ENSG00000260661.1	RP11-152L20.3	0.868442	0.000101923	0.00320704	Antisense	NA	N
ENSG00000260671.2	RP11-278A23.2	0.586892	0.00429269	0.0455266	Intronic	NA	Y
ENSG00000260672.1	RP11-1006G14.1	0.456339	0.00613406	0.0573124	Intergenic	-3.3506	Y
ENSG00000260679.1	RP11-643C9.2	1.27781	3.14158e-08	3.94479e-06	Intergenic	NA
ENSG00000260698.1	RP11-439E19.9	0.397424	0.000569003	0.0114789	Intergenic	-3.89885	Y
ENSG00000260708.1	CTA-29F11.1	0.496711	2.00994e-05	0.000932274	Intergenic	0.232303	Y
ENSG00000260719.1	AC009133.17	1.75542	5.88881e-15	2.44701e-12	Antisense	-0.383804	Y
ENSG00000260735.1	RP11-72I8.1	0.413016	0.00243311	0.0312428	Intronic	-1.89819	Y
ENSG00000260741.1	CTC-391G2.1	0.701523	0.00450003	0.0470269	Antisense	NA	N
ENSG00000260751.2	CTD-2196E14.6	0.424529	0.000393782	0.00890561	Intronic	-3.35969	Y
ENSG00000260760.1	PWRN3	0.805337	0.00133928	0.0207284	Intergenic	-1.66558	N
ENSG00000260773.1	RP11-352G18.2	0.32632	0.0125095	0.0899176	Antisense	-1.25659	Y
ENSG00000260774.1	CTD-2083E4.4	0.313942	0.000977148	0.0167386	Exonic	-2.3439	Y
ENSG00000260793.2	RP5-882C2.2	0.330417	0.00632275	0.0585461	Antisense	-3.99004	Y
ENSG00000260796.1	RP11-1348G14.5	0.375583	0.0121924	0.0883565	Intergenic	NA	Y
ENSG00000260806.1	RP11-872J21.3	0.365463	0.00167669	0.0242753	Antisense	0.583378
ENSG00000260807.5	RP11-161M6.2	0.409861	0.00424437	0.0451869	Exonic	-2.81555	Y
ENSG00000260808.1	CTD-2007L18.5	0.382894	0.00499395	0.0500849	Antisense	-1.65105	N
ENSG00000260876.4	LINC01229	0.774915	2.28327e-06	0.000157319	Intergenic	NA
ENSG00000260877.1	RP11-211G23.2	0.895121	0.000320591	0.00769628	Intergenic	-4.90021	N
ENSG00000260886.1	TAT-AS1	0.460324	0.00961542	0.0757414	Antisense	-1.21412
ENSG00000260899.1	RP11-2C24.4	0.42309	0.000982998	0.0168174	Exonic	-4.20396
ENSG00000260911.2	RP11-196G11.2	0.476267	0.00277113	0.0340298	Intergenic	-1.48562	Y
ENSG00000260912.1	RP11-363E7.4	0.359506	8.95102e-05	0.00291193	Intergenic	-0.620843	Y
ENSG00000260917.1	RP11-57H14.4	-0.304919	0.00188005	0.0262616	Intergenic	-1.59258	Y
ENSG00000260923.4	AC137934.1	-0.540089	0.000332057	0.00788463	Intergenic	-1.94861	Y
ENSG00000260924.2	LINC01311	0.354866	0.0125677	0.0901364	Intergenic	-1.17163
ENSG00000260932.1	RP11-483P21.6	0.903582	3.21278e-07	2.99762e-05	Antisense	NA	Y
ENSG00000260951.1	RP5-978I12.1	-0.678153	0.00783677	0.0667533	Intergenic	NA	N
ENSG00000260988.1	RP11-285A1.1	0.389012	0.00913657	0.0734919	Intronic	-0.937574	Y
ENSG00000260992.1	DOCK9-AS2	0.249042	0.00844894	0.0701046	Intergenic	-0.758604	Y
ENSG00000261097.1	LINC00563	0.87724	3.14182e-05	0.00130436	Intergenic	-1.82597	Y
ENSG00000261101.2	RP4-545K15.5	0.432677	0.000188397	0.00514132	Intergenic	-3.0485	Y
ENSG00000261104.1	RP11-734K21.5	0.844202	0.000473494	0.0101842	Intergenic	-1.8044	Y
ENSG00000261105.4	LMO7-AS1	0.583927	0.000946813	0.0163861	Antisense	3.27558
ENSG00000261113.1	RP11-141O15.1	0.512433	0.00259766	0.0326486	Antisense	NA
ENSG00000261126.6	RP11-795F19.1	0.361119	0.00151111	0.0225671	Exonic	-2.92008
ENSG00000261131.1	RP11-93O14.2	0.411358	0.00182162	0.0256422	Intronic	NA	Y
ENSG00000261136.1	RP11-37C7.3	0.366478	0.00790589	0.0671074	Antisense	-1.48092
ENSG00000261140.1	RP11-20I23.6	0.483227	0.00575531	0.0548285	Antisense	-1.61027	Y
ENSG00000261159.1	RP11-723O4.9	0.632591	2.50608e-05	0.00109085	Intergenic	-1.79013	Y
ENSG00000261189.1	RP3-512B11.3	0.384363	0.000544325	0.0111444	Intergenic	-0.0881342	Y
ENSG00000261193.1	RP11-863P13.5	-0.76425	0.00246428	0.0315126	Antisense	NA	N
ENSG00000261207.1	LA16c-361A3.3	0.445853	0.00332447	0.0385631	Antisense	-1.98089	Y
ENSG00000261220.2	RP11-629O1.2	0.412683	0.0104558	0.0801188	Intergenic	-1.1654	Y
ENSG00000261257.1	RP11-673E11.2	0.780865	0.000424834	0.00937776	Intergenic	NA	Y
ENSG00000261318.1	RP11-653J6.1	0.421907	0.0136359	0.0951065	Antisense	NA	Y
ENSG00000261338.2	RP11-378A13.1	-0.242767	0.00212855	0.0284751	Intergenic	0.398069	Y
ENSG00000261351.2	CTD-3185P2.1	0.192355	0.0108209	0.0818614	Exonic	0.0629047
ENSG00000261353.1	CTA-14H9.5	-0.374594	0.00637281	0.0587936	Intergenic	1.15563	Y
ENSG00000261360.1	CTD-2165H16.4	0.377324	0.00391308	0.0428599	Intergenic	-0.324104	Y
ENSG00000261369.1	RP11-474B12.1	0.604361	0.0122331	0.0885241	Antisense	NA	N
ENSG00000261379.1	RP11-395N3.1	0.775565	0.000413241	0.00920757	Intergenic	-2.73765	Y
ENSG00000261416.1	RP11-455F5.5	0.497095	0.0040365	0.0437717	Antisense	NA	Y
ENSG00000261426.1	AC144833.1	0.643758	0.0019332	0.0267864	Intronic	NA	Y
ENSG00000261433.1	CTC-297N7.1	0.65614	4.4446e-05	0.00172305	Intergenic	NA	Y
ENSG00000261467.2	RP11-731K22.1	0.807876	0.00010787	0.00336266	Intergenic	NA	Y
ENSG00000261468.1	RP11-1024P17.1	0.325352	0.00404789	0.0438598	Intergenic	-2.31269	Y
ENSG00000261480.1	RP11-578F21.6	0.937908	0.000168561	0.00472475	Exonic	NA
ENSG00000261489.1	CTD-2515H24.3	0.471591	0.00879264	0.0716984	Antisense	NA	Y
ENSG00000261490.1	RP11-448G15.3	0.36682	0.0063142	0.0584938	Intergenic	-4.53596	Y
ENSG00000261512.2	RP11-46D6.1	-0.367536	9.10779e-05	0.00294393	Intergenic	-0.0543169	Y
ENSG00000261526.2	CTB-31O20.2	0.327313	0.000964483	0.0165709	Intergenic	-1.08144	Y
ENSG00000261543.1	RP11-665J16.1	0.577364	0.0136537	0.0951651	Antisense	NA	N
ENSG00000261570.1	RP11-744I24.2	0.600668	0.000487683	0.0103934	Antisense	NA	Y
ENSG00000261578.1	RP11-21L23.2	0.419182	0.000114272	0.00350529	Intergenic	-1.41759	Y
ENSG00000261583.1	CTD-2385L22.1	0.744313	0.00362674	0.0407696	Antisense	NA	N
ENSG00000261606.4	RP11-414J4.2	0.576505	0.0039031	0.0427971	Exonic	NA
ENSG00000261610.1	AP000265.1	0.615795	0.00100947	0.0171465	Intergenic	-2.05836	Y
ENSG00000261632.1	RP11-390D11.1	0.542051	0.0098305	0.0768498	Antisense	NA	Y
ENSG00000261663.1	RP11-304L19.11	0.337805	0.00147952	0.0222104	Antisense	-2.65001	Y
ENSG00000261685.2	RP11-401P9.4	-0.469562	0.00220829	0.029241	Intergenic	-1.06948	Y
ENSG00000261707.1	RP11-264M12.2	0.421899	0.0070358	0.0622001	Antisense	0.275634	Y
ENSG00000261713.5	SSTR5-AS1	-0.695385	0.0019277	0.0267469	Intergenic	-0.795261	Y
ENSG00000261744.1	RP11-21B21.4	0.39751	0.0121531	0.0881647	Antisense	NA	Y
ENSG00000261758.1	RP11-102M11.2	-0.630522	0.00339479	0.039032	Intergenic	-2.41736	Y
ENSG00000261761.3	RP11-103J17.2	0.666846	0.00257744	0.0325059	Intergenic	0.372297	N
ENSG00000261766.1	RP11-22P6.2	0.590318	1.63996e-07	1.68047e-05	Antisense	-0.0874628	Y
ENSG00000261777.4	RP11-529K1.2	0.407838	8.79243e-06	0.000469889	Antisense	0.237061	Y
ENSG00000261797.1	RP11-744I24.3	0.542069	0.00533279	0.0522735	Intergenic	NA	Y
ENSG00000261824.5	LINC00662	0.289968	0.00585632	0.0555544	Intergenic	0.45094	Y
ENSG00000261839.1	RP1-265C24.8	0.392581	0.00375025	0.0416767	Intergenic	-1.64099	Y
ENSG00000261840.2	RP11-146F11.1	0.31855	0.00623544	0.0579506	Antisense	-2.84984	Y
ENSG00000261864.1	RP11-67A1.2	0.44549	0.0110136	0.0826985	Exonic	NA	Y
ENSG00000261971.5	MMP25-AS1	0.288222	0.00113594	0.0186275	Antisense	-2.83278
ENSG00000261996.1	CTC-281F24.1	0.440372	0.000296922	0.00725337	Intergenic	-2.19812	Y
ENSG00000262006.1	RP11-700H6.4	0.738839	1.73917e-05	0.000827636	Intergenic	NA	Y
ENSG00000262052.1	RP11-763E3.1	0.959595	3.24993e-07	3.02529e-05	Antisense	NA	N
ENSG00000262117.4	BCAR4	2.32013	2.48302e-25	3.03282e-22	Intergenic	NA	Y
ENSG00000262133.1	RP11-676J12.6	0.987124	1.24893e-07	1.33884e-05	Antisense	NA	Y
ENSG00000262136.1	CTD-2033A16.3	-0.863486	4.1284e-06	0.000253664	Antisense	-0.440316	Y
ENSG00000262188.1	RP11-353N14.4	0.830701	7.42127e-07	6.03083e-05	Intergenic	-0.816061	Y
ENSG00000262198.1	RP11-124N19.3	0.61492	0.0113341	0.0843586	Intergenic	NA	Y
ENSG00000262202.4	RP11-160E2.6	-1.00237	2.21548e-05	0.000998873	Intergenic	-2.18924
ENSG00000262312.2	LA16c-390H2.4	0.511602	0.000687932	0.013129	Antisense	-3.05774	Y
ENSG00000262370.4	RP11-473M20.9	0.446086	0.000765623	0.0141755	Antisense	-3.04606	Y
ENSG00000262445.3	CTD-2545H1.2	0.455304	0.00962533	0.0757899	Antisense	0.539661	Y
ENSG00000262585.1	RP11-353N14.5	0.531412	0.0066023	0.0598424	Intergenic	-1.70155	Y
ENSG00000262652.1	RP13-638C3.2	0.382408	0.00935466	0.0745529	Intronic	-3.49345	Y
ENSG00000262691.1	CTC-277H1.7	0.482799	1.28447e-05	0.000636033	Exonic	-3.25373
ENSG00000262728.4	RP11-1000B6.8	0.311506	0.00206361	0.0279872	Antisense	-0.752522
ENSG00000262766.1	RP11-196G11.4	0.339759	0.00673515	0.0605698	Intronic	-2.57698	Y
ENSG00000262772.1	RP11-353N14.2	0.599472	7.25871e-05	0.00248157	Intergenic	-2.8768	Y
ENSG00000262823.1	RP13-580F15.2	-0.525777	0.00530701	0.0520981	Antisense	NA	Y
ENSG00000262833.1	RP11-28G8.1	0.608549	0.0082522	0.0690229	Antisense	NA	N
ENSG00000262877.4	RP11-1055B8.4	0.476541	0.00383324	0.0423054	Intergenic	-5.78272	Y
ENSG00000262884.1	CTD-3060P21.1	-0.386492	0.010171	0.0785367	Antisense	-0.263264
ENSG00000262903.1	RP11-235E17.6	0.5572	2.58371e-05	0.0011198	Antisense	-5.59476	Y
ENSG00000263015.1	RP5-1029F21.3	-0.802118	0.00175057	0.0249358	Antisense	NA	N
ENSG00000263033.2	RP11-396B14.2	0.477242	0.00109183	0.018103	Intergenic	-1.43975	Y
ENSG00000263041.1	RP11-355F22.1	0.631313	0.011704	0.085983	Intergenic	NA	N
ENSG00000263065.1	AF001548.6	-0.459042	0.00665811	0.0601393	Antisense	-2.49185
ENSG00000263080.1	RP11-485G7.5	0.613825	0.000339143	0.00802383	Antisense	-0.389946	Y
ENSG00000263082.1	CTD-2034I21.2	-0.881397	0.000585366	0.0116885	Intergenic	1.14136	N
ENSG00000263120.1	RP5-1107A17.4	0.514676	0.00330336	0.0384267	Intronic	-3.37176	Y
ENSG00000263126.1	CTC-479C5.10	0.300494	0.0114639	0.0849268	Exonic	-4.30894
ENSG00000263167.1	RP11-149I9.2	0.598881	0.00389157	0.0427454	Antisense	NA	Y
ENSG00000263220.1	RP11-420A6.2	0.48014	0.00158912	0.0234625	Intronic	NA	Y
ENSG00000263276.1	RP11-96D1.10	0.296372	0.00173724	0.0248306	Exonic	-4.01851
ENSG00000263335.1	AF001548.5	-0.262726	0.00529609	0.0520404	Antisense	-0.788318
ENSG00000263345.1	RP1-59D14.5	0.382935	0.00534328	0.0523509	Antisense	-4.15087	Y
ENSG00000263400.5	TMEM220-AS1	0.410397	0.00995947	0.0775123	Antisense	0.586218
ENSG00000263429.3	LINC00675	0.534278	0.00710918	0.0625561	Intergenic	-1.06012	Y
ENSG00000263508.4	RP11-963H4.3	0.586215	0.000150236	0.00432263	Intergenic	-0.415038	Y
ENSG00000263531.1	RP13-753N3.1	0.585018	0.000537161	0.0110635	Antisense	NA	Y
ENSG00000263624.1	RP11-45M22.3	0.674191	0.000426338	0.0094058	Antisense	NA	Y
ENSG00000263627.1	PPP4R1-AS1	0.375603	0.0144732	0.0987001	Intergenic	NA
ENSG00000263753.5	LINC00667	0.140178	0.0106166	0.0809609	Intergenic	0.304297	Y
ENSG00000264016.2	CTC-297N7.9	0.448818	0.00616385	0.0574884	Intergenic	1.0177	Y
ENSG00000264044.1	RP11-192H23.7	0.45282	0.010984	0.0826038	Antisense	NA
ENSG00000264067.1	RP11-401O9.3	0.849064	0.000291323	0.00715125	Antisense	1.60867	N
ENSG00000264080.1	CTD-2015H3.1	0.618209	0.00109839	0.0181744	Intergenic	NA	N
ENSG00000264235.4	RP13-270P17.1	0.339076	0.000890013	0.0156153	Antisense	-0.79849	Y
ENSG00000264290.1	RP11-68I3.4	0.399995	0.00305762	0.0363015	Intronic	-4.98706	Y
ENSG00000264456.1	RP11-848P1.2	0.39872	8.16137e-07	6.53997e-05	Intronic	-1.86698	Y
ENSG00000264514.1	RP11-720L2.4	0.469162	0.0105838	0.0807654	Antisense	NA	Y
ENSG00000264589.1	MAPT-AS1	-0.703624	0.00396299	0.0432772	Antisense	0	Y
ENSG00000264660.2	RP11-381P6.1	0.798169	8.76638e-05	0.00286575	Intergenic	-0.0627655	Y
ENSG00000264707.1	L3MBTL4-AS1	0.374796	0.00459097	0.0475947	Antisense	NA
ENSG00000264727.1	RP11-680C21.1	-0.512695	0.000883824	0.0155973	Intronic	-0.560506	Y
ENSG00000264772.4	RP11-186B7.4	0.28367	0.0147626	0.0998938	Exonic	-3.32696
ENSG00000264932.3	CTD-2104P17.2	0.436916	0.0140239	0.0968411	Antisense	NA
ENSG00000264964.1	RP11-888D10.3	0.314044	0.00735385	0.0640475	Intergenic	0.529706	Y
ENSG00000264968.1	RP11-387H17.4	0.6902	9.16184e-07	7.22674e-05	Intergenic	0.403356	Y
ENSG00000265000.1	RP11-453A12.1	0.657073	0.0100467	0.0779353	Intergenic	-4.82443	N
ENSG00000265010.1	RP11-661C3.2	0.441458	0.00201369	0.0275906	Intronic	NA	Y
ENSG00000265096.1	C1QTNF1-AS1	0.841119	0.000108689	0.00338034	Antisense	1.03241
ENSG00000265174.1	CTD-2124B20.3	1.04376	1.00423e-05	0.000523644	Intergenic	NA	N
ENSG00000265194.1	RP11-70L8.4	0.373679	0.00646997	0.059229	Antisense	NA
ENSG00000265218.1	RP11-927P21.1	-0.864006	6.62707e-07	5.48496e-05	Antisense	-0.920384	Y
ENSG00000265349.1	RP11-55L4.2	0.481535	0.00795204	0.0673367	Antisense	NA	Y
ENSG00000265399.1	RP13-270P17.2	-0.28843	0.000706062	0.0133611	Antisense	-0.923998	Y
ENSG00000265451.1	RP11-204L24.2	0.351419	0.0121396	0.088085	Antisense	-0.107124	Y
ENSG00000265479.4	DTX2P1-UPK3BP1-PMS2P11	0.407821	5.75314e-05	0.00209289	Intergenic	-2.09894	Y
ENSG00000265519.1	CTD-3157E16.1	-0.431267	0.000680179	0.0130304	Intergenic	NA	Y
ENSG00000265625.1	RP11-68I3.11	0.446884	0.0120753	0.0877775	Intronic	-1.74705	Y
ENSG00000265692.1	RP13-516M14.4	0.422999	0.00647515	0.0592494	Intergenic	-0.844195	Y
ENSG00000265717.1	RP11-94B19.7	0.866971	0.000687911	0.013129	Intergenic	NA	N
ENSG00000265743.1	RP11-848P1.3	0.309675	0.00277173	0.0340298	Intergenic	NA	Y
ENSG00000265750.1	RP11-799B12.4	0.423376	0.000441857	0.00965308	Exonic	-2.77521	Y
ENSG00000265787.1	CYP4F35P	0.733944	0.000306979	0.00743148	Intergenic	-3.49901	Y
ENSG00000265907.1	RP11-737O24.2	1.44721	5.373e-10	1.00843e-07	Antisense	NA	N
ENSG00000265944.1	LINC01387	1.00415	8.1168e-05	0.0027016	Intergenic	NA
ENSG00000265975.1	CTB-41I6.2	0.379794	0.010856	0.0820154	Intergenic	0.135472	Y
ENSG00000266053.2	NDUFV2-AS1	0.231204	0.00227463	0.0297673	Antisense	0.107482
ENSG00000266171.1	RP11-769O8.1	0.459404	0.00550218	0.0534967	Antisense	NA
ENSG00000266340.1	RP11-848P1.4	0.856862	9.40191e-06	0.000495376	Antisense	NA	Y
ENSG00000266369.1	RP11-344E13.4	0.73413	0.00338297	0.0389481	Antisense	NA	Y
ENSG00000266521.1	RP11-650P15.1	0.563796	0.00493501	0.0496916	Intergenic	NA	Y
ENSG00000266579.1	RP1-71H19.2	0.921584	2.89176e-06	0.000189525	Intronic	NA	Y
ENSG00000266644.1	RP11-927P21.2	-0.578208	0.00442519	0.0465048	Antisense	NA	Y
ENSG00000266651.1	RP11-138I1.3	0.456966	0.00259571	0.0326342	Intergenic	NA	Y
ENSG00000266729.4	DSG1-AS1	0.504031	0.0102472	0.0789741	Antisense	NA
ENSG00000266835.4	LINC01540	0.479095	0.00936406	0.0745533	Intergenic	1.74704
ENSG00000266916.4	ZNF793-AS1	0.225517	0.00992434	0.0773136	Antisense	1.3543
ENSG00000266918.1	RP11-798G7.8	-0.563918	0.00888133	0.0721588	Intergenic	-4.24567	Y
ENSG00000266957.1	RP11-49K24.4	0.559147	0.00145907	0.0220017	Antisense	NA	Y
ENSG00000266969.1	RP11-773H22.4	0.343406	0.0107495	0.0815815	Antisense	NA	Y
ENSG00000266975.1	FARSA-AS1	0.775432	9.99618e-06	0.000521912	Antisense	NA
ENSG00000266994.1	RP11-127I20.7	0.490913	0.0127954	0.0911694	Exonic	NA	Y
ENSG00000267002.1	RP11-242D8.1	0.246781	0.00713005	0.0626807	Intergenic	-2.8836	Y
ENSG00000267055.1	RP11-486P11.1	1.77313	3.71748e-13	1.21822e-10	Intergenic	0.392317	Y
ENSG00000267078.1	RP11-666A8.9	0.681682	0.00167675	0.0242753	Antisense	-2.52356
ENSG00000267092.2	CTB-25B13.9	0.596091	0.000408644	0.00915068	Antisense	0.554589
ENSG00000267131.1	RP11-332H18.5	0.436881	0.00711337	0.0625624	Antisense	0.291655	Y
ENSG00000267147.2	CTC-548K16.1	0.573693	0.00928337	0.074243	Intergenic	2.86247	N
ENSG00000267163.1	AC084219.3	0.369469	0.00945651	0.0749142	Antisense	NA	Y
ENSG00000267174.4	CTC-510F12.4	0.364791	0.00625195	0.0580731	Exonic	NA	Y
ENSG00000267192.1	AC006116.12	0.433072	0.00138645	0.0212162	Antisense	NA	Y
ENSG00000267198.1	RP11-798G7.6	-0.419252	0.00621998	0.057847	Intergenic	-1.43984	Y
ENSG00000267199.1	RP11-861E21.2	0.504417	0.00126641	0.0199395	Antisense	-3.30054	Y
ENSG00000267212.1	CTD-2659N19.9	0.538158	0.00883262	0.0719661	Intronic	NA	Y
ENSG00000267219.1	AC010504.2	0.246649	0.00225465	0.0296458	Antisense	0.560741	Y
ENSG00000267244.4	CTB-31O20.4	0.347236	0.00828122	0.0691998	Antisense	-2.45943	Y
ENSG00000267277.1	CTD-2342J14.6	0.289353	0.000187169	0.00511472	Antisense	-1.07917	Y
ENSG00000267280.4	TBX2-AS1	0.532162	0.000563123	0.0113945	Antisense	-0.304645
ENSG00000267287.1	RP11-567M16.1	0.359316	0.00611927	0.0572419	Intergenic	NA	Y
ENSG00000267289.1	CTD-2623N2.11	0.625597	4.01187e-05	0.00159546	Intergenic	0.275634	Y
ENSG00000267308.1	AC004510.3	0.741013	2.16276e-05	0.000981743	Intergenic	NA	Y
ENSG00000267345.1	CTD-2293H3.2	0.306366	0.00703835	0.0622001	Antisense	NA	N
ENSG00000267348.2	CTB-179K24.3	0.227958	0.00987844	0.0771004	Exonic	-0.00869933	Y
ENSG00000267354.1	RP11-749H17.2	-0.679275	0.00811556	0.0683623	Intronic	NA	N
ENSG00000267372.2	AC005330.2	0.538134	0.00301556	0.0359568	Intronic	NA	Y
ENSG00000267374.1	RP11-244M2.1	0.504523	0.00433994	0.0457932	Intergenic	0.267595
ENSG00000267383.5	CTC-260E6.6	0.428157	0.0129081	0.0916643	Antisense	0.672992	Y
ENSG00000267397.1	RP11-873E20.1	0.337224	0.00570209	0.0545866	Intergenic	-1.59324	Y
ENSG00000267419.1	CTC-559E9.6	0.225601	7.03863e-05	0.00242277	Antisense	NA	Y
ENSG00000267429.1	AC006116.15	0.482553	0.000553224	0.0112677	Intronic	-0.966833	Y
ENSG00000267457.1	RP5-837J1.4	0.766188	7.84058e-06	0.000429939	Intronic	-2.41504	Y
ENSG00000267480.1	RP11-703I16.1	-0.281977	0.00154381	0.0229448	Intergenic	NA	Y
ENSG00000267523.1	CTD-2537I9.12	0.432495	0.00228035	0.0298229	Antisense	NA
ENSG00000267565.1	CTC-559E9.8	-0.247893	0.00154149	0.0229358	Antisense	NA	Y
ENSG00000267571.1	AC104532.4	0.30526	0.0124119	0.089481	Antisense	NA
ENSG00000267577.1	CTD-2587H24.5	-0.755045	0.00321479	0.0377121	Antisense	-0.928004	N
ENSG00000267606.1	AC006116.21	0.497946	0.000756933	0.0140468	Exonic	NA	Y
ENSG00000267610.2	AC007787.2	0.520452	0.00769079	0.0659559	Antisense	NA
ENSG00000267612.1	CTD-3116E22.7	0.414559	0.00598724	0.0563586	Intergenic	NA	Y
ENSG00000267629.3	AC138430.4	0.608508	0.0102261	0.0788413	Exonic	-1.54383
ENSG00000267633.1	CTB-5E10.3	1.57332	5.20326e-15	2.20766e-12	Antisense	NA
ENSG00000267670.1	CTB-55O6.4	-0.625562	0.0142224	0.0977598	Antisense	NA	N
ENSG00000267719.1	HP09025	-0.460287	0.00997841	0.0776148	Intergenic	0.160965
ENSG00000267857.2	RP5-1023B21.1	0.755287	0.00203096	0.0276748	Antisense	NA
ENSG00000267858.4	MZF1-AS1	0.250076	0.00235349	0.0304827	Antisense	-1.12222
ENSG00000267890.1	CTD-2126E3.4	-0.781826	0.000778876	0.0143402	Intergenic	-1.83065	Y
ENSG00000267896.1	AC018766.4	0.327523	0.00391026	0.0428599	Antisense	-4.53524
ENSG00000267919.1	RP11-256I23.3	0.551992	0.00996234	0.0775197	Intergenic	NA	N
ENSG00000267939.1	CTD-2325M2.1	0.305934	0.00345749	0.0395014	Antisense	1.04109	Y
ENSG00000267968.1	AC011523.2	0.4449	0.0127498	0.0909268	Antisense	NA	Y
ENSG00000267980.1	AC007292.6	0.373212	0.00133933	0.0207284	Antisense	-2.41106
ENSG00000267986.1	AC130469.2	0.49781	0.00742534	0.0644082	Antisense	NA	Y
ENSG00000268030.1	AC005253.2	0.251221	0.0145662	0.0990921	Antisense	NA
ENSG00000268078.1	RP11-805I24.4	0.719441	0.00132645	0.0205794	Intergenic	NA	N
ENSG00000268181.3	RP11-73B2.7	0.658518	0.00264992	0.0330682	Intergenic	NA
ENSG00000268230.4	CTD-2619J13.8	0.310422	0.0146813	0.0996005	Exonic	-3.90736	Y
ENSG00000268401.1	CTC-344H19.4	0.469297	0.00334757	0.0387064	Intergenic	-3.12466	Y
ENSG00000268471.4	DKFZP434I0714	0.21915	0.00775606	0.0663283	Intergenic	-0.963563
ENSG00000268499.1	CTB-102L5.8	0.460533	0.00454876	0.0473397	Intronic	NA	Y
ENSG00000268583.1	CTC-453G23.8	0.348707	0.0110581	0.0829708	Antisense	NA	Y
ENSG00000268584.1	RP11-464F9.20	0.297326	0.00475685	0.0484912	Intergenic	-0.419579	Y
ENSG00000268812.3	RP1-102K2.8	0.545534	0.0028255	0.0344279	Antisense	0.059864	N
ENSG00000268945.1	CTD-2192J16.26	0.468569	0.000887467	0.0156153	Intergenic	-1.4311	Y
ENSG00000268947.1	AD000684.2	0.405849	0.0017762	0.0251734	Intronic	-4.8514	Y
ENSG00000268970.1	CTD-3099C6.11	0.329292	1.94053e-05	0.000907387	Intronic	NA	Y
ENSG00000268996.3	MAN1B1-AS1	0.249929	0.0109115	0.0822085	Intergenic	1.7345
ENSG00000269019.1	AC005932.1	0.453508	0.00149443	0.0224009	Antisense	-1.57362	Y
ENSG00000269054.1	CTD-2619J13.3	0.269163	0.00281464	0.0343474	Antisense	-2.99563	Y
ENSG00000269191.1	AC005387.2	0.336316	0.0131177	0.0926793	Antisense	NA	Y
ENSG00000269210.2	RP11-173C1.1	-0.429318	0.0140148	0.0968115	Antisense	1.11206
ENSG00000269220.1	LINC00528	0.400683	0.00998349	0.0776243	Intergenic	-0.0672686	Y
ENSG00000269300.1	CTD-2529P6.3	0.511979	0.00468578	0.0481319	Antisense	NA
ENSG00000269321.1	CTC-453G23.4	0.607233	0.0134547	0.0941851	Antisense	NA	N
ENSG00000269353.1	AC092071.1	0.623945	0.0145171	0.0988578	Intergenic	NA	N
ENSG00000269386.4	RAB11B-AS1	0.273509	0.00589279	0.0557367	Antisense	0.430734	Y
ENSG00000269480.1	CTD-3032J10.3	0.566999	0.00416338	0.0446075	Antisense	NA	N
ENSG00000269483.1	AC006272.1	0.585471	4.48845e-05	0.0017296	Intergenic	-1.14902	Y
ENSG00000269889.1	RP11-816J6.3	0.586895	5.55951e-06	0.000321715	Antisense	-0.401012	Y
ENSG00000269890.1	RP5-1139B12.2	-0.375138	0.00397407	0.0433512	Antisense	-0.473766
ENSG00000269899.1	RP11-589N15.2	0.431825	0.000811873	0.0147009	Intronic	NA	Y
ENSG00000269919.1	RP1-134E15.3	0.631013	0.00108298	0.0179933	Intronic	-2.24598	Y
ENSG00000269937.1	RP11-20I23.8	0.613046	0.00120684	0.0193737	Antisense	-1.39484
ENSG00000269949.1	RP11-738E22.3	0.33694	0.00893469	0.0723873	Intergenic	0.376049	Y
ENSG00000269956.1	MKNK1-AS1	0.417774	0.00335517	0.0387609	Antisense	2	Y
ENSG00000269967.1	RP11-84A19.4	0.511335	0.00410146	0.0441358	Intronic	NA	Y
ENSG00000269978.1	RP11-338N10.3	0.548577	0.0017486	0.0249226	Antisense	-3.18194	Y
ENSG00000269985.1	RP1-232P20.1	0.385274	0.00138716	0.0212191	Antisense	1.25376	Y
ENSG00000269989.1	RP11-635N19.3	0.664821	0.00907991	0.0732261	Intronic	NA	N
ENSG00000269994.1	RP11-276H19.2	-0.946506	4.44582e-05	0.00172305	Intergenic	1.42513	Y
ENSG00000270002.1	RP11-93H12.4	0.760046	0.00291768	0.0351611	Antisense	0.427016	N
ENSG00000270015.1	RP11-540B6.6	0.217271	0.00434931	0.0458681	Intronic	-3.35513	Y
ENSG00000270036.1	RP11-685G9.4	0.664603	0.00460909	0.0476453	Intergenic	0	N
ENSG00000270069.1	MIR222HG	0.471246	0.00788981	0.0670509	Intergenic	-4.98773
ENSG00000270083.1	RP1-257I20.14	0.227734	0.0140738	0.0971022	Intronic	-1.28115	Y
ENSG00000270093.1	AP000473.8	0.716916	4.01513e-06	0.000247837	Intergenic	-3.72636	Y
ENSG00000270116.1	AP001429.1	0.352797	0.0112912	0.0842334	Intronic	-3.08258	Y
ENSG00000270133.1	CTC-303L1.2	0.437361	0.00935909	0.0745529	Intronic	NA	Y
ENSG00000270147.1	RP11-646I6.6	0.359124	0.0122405	0.0885615	Antisense	-3.03065
ENSG00000270179.1	RP11-159N11.4	0.328118	0.000878815	0.0155225	Exonic	-1.68243
ENSG00000270212.1	CTD-2540B15.12	0.738281	0.00189585	0.0264233	Intergenic	NA	N
ENSG00000270362.1	HMGN3-AS1	-0.227905	0.00259986	0.0326494	Antisense	-0.656686	Y
ENSG00000270426.1	RP11-326I11.5	0.447562	0.000210329	0.00558112	Intronic	-3.25484	Y
ENSG00000270482.1	RP11-131L12.2	0.317553	0.00739267	0.0641805	Intergenic	-1.6949	Y
ENSG00000270607.1	RP11-359E10.1	-0.392322	0.00551743	0.0536004	Antisense	0.440697	Y
ENSG00000270638.1	RP3-466P17.1	0.319288	0.00936813	0.0745538	Antisense	-0.727536
ENSG00000270673.1	YTHDF3-AS1	0.43784	0.00047674	0.0102358	Intergenic	0.996322	Y
ENSG00000270681.1	RP11-372K14.2	-0.433543	1.96856e-06	0.000137278	Antisense	-0.354185	Y
ENSG00000270696.1	RP11-342K6.1	-0.325384	6.74027e-11	1.5704e-08	Intronic	1.12133
ENSG00000270894.1	AC015849.13	0.463124	0.0131068	0.0926185	Intronic	NA	Y
ENSG00000271119.1	CTD-2012J19.3	0.396759	0.00260136	0.0326494	Intergenic	0	Y
ENSG00000271141.1	RP11-171I2.4	0.384116	0.00965344	0.0759222	Antisense	-4.02273
ENSG00000271335.4	RP11-324I22.4	0.329358	0.00201286	0.0275906	Antisense	-1.23358	Y
ENSG00000271387.1	RP11-382D12.2	0.594982	4.43357e-05	0.00172162	Intergenic	-1.43439	Y
ENSG00000271392.1	RP1-161P9.5	0.57631	0.00245271	0.0314286	Intronic	NA	Y
ENSG00000271401.1	RP11-171I2.3	0.439164	0.0136601	0.0951767	Antisense	0.616671	Y
ENSG00000271427.1	RP11-188D8.1	0.455606	0.00170736	0.0245518	Intergenic	-1.16242	Y
ENSG00000271452.1	RP11-342K6.2	-0.440678	6.26263e-06	0.000358054	Antisense	-0.278727
ENSG00000271533.1	RP3-368A4.6	0.376547	0.000781533	0.014371	Intergenic	-4.52487	Y
ENSG00000271553.1	RP11-274B21.10	0.363604	0.00569179	0.0545311	Intergenic	-2.04348	Y
ENSG00000271555.1	CTD-3214K23.1	0.576837	0.000125539	0.00374822	Antisense	NA	Y
ENSG00000271576.1	RP11-486G15.2	0.379084	0.00165567	0.0240574	Intergenic	-2.84367	Y
ENSG00000271579.1	RP11-116D17.3	0.582797	0.000638596	0.0124588	Intergenic	-2.4641	Y
ENSG00000271725.1	RP11-761I4.4	0.449477	0.00651631	0.0594775	Exonic	NA
ENSG00000271732.1	RP5-1182A14.5	1.31786	2.46235e-09	4.06762e-07	Intergenic	NA	Y
ENSG00000271751.1	RP11-110I1.14	0.457322	0.000222255	0.00584373	Intergenic	-0.358915	Y
ENSG00000271754.1	RP3-337H4.9	0.476909	0.000121224	0.00366007	Antisense	-1.38761
ENSG00000271757.1	RP11-111M22.5	0.438735	0.00837756	0.0697386	Intronic	-0.097295	Y
ENSG00000271771.1	RP11-1250I15.3	0.602904	0.00846271	0.0701721	Intergenic	NA	N
ENSG00000271789.1	RP5-1112D6.7	0.306862	0.0100932	0.0781756	Intergenic	-2.28699	Y
ENSG00000271795.1	CTC-251D13.1	0.563802	0.000471025	0.0101419	Antisense	-3.91306
ENSG00000271828.1	CTD-2310F14.1	0.250332	0.0126674	0.0905295	Antisense	-0.311279
ENSG00000271862.1	RP11-343L5.2	0.313247	0.00452806	0.0471949	Intergenic	-2.90884	Y
ENSG00000271868.1	RP11-1293J14.1	-0.374	0.000196526	0.00531278	Antisense	-1.99465
ENSG00000271869.1	RP11-51J9.5	0.384605	0.00694576	0.0618156	Antisense	1.26023	Y
ENSG00000271870.1	RP11-97C16.1	0.454261	0.000345256	0.00810969	Antisense	-2.87687
ENSG00000271880.1	AGAP11	0.74845	6.69209e-05	0.00232935	Exonic	-2.74145
ENSG00000271889.1	RP11-493E12.1	0.427368	0.00844045	0.0700884	Antisense	NA	Y
ENSG00000271892.1	CTD-2228A4.1	0.784864	0.00202373	0.0276231	Antisense	NA	N
ENSG00000271895.2	RP4-635E18.8	0.351118	0.000700932	0.0132953	Exonic	-1.60804
ENSG00000271911.1	RP11-532F6.5	-0.45104	0.00878615	0.0716599	Intergenic	0	Y
ENSG00000271917.1	RP11-506O24.2	0.605264	0.00899927	0.0727566	Intronic	-4.64386	N
ENSG00000271952.1	RP11-245G13.2	-0.771509	0.000995831	0.0169577	Intergenic	NA	Y
ENSG00000271959.1	CTD-3064M3.7	0.808523	1.35673e-05	0.000664993	Intergenic	-4.23027	Y
ENSG00000271966.1	RP11-7F18.2	0.395455	0.000574081	0.0115291	Intergenic	-1.6589	Y
ENSG00000271983.1	RP11-28H5.2	0.608879	6.64894e-05	0.00231833	Antisense	-1.94589	Y
ENSG00000272002.1	RP11-557L19.1	0.462063	0.0012425	0.0197094	Intergenic	-0.584962	Y
ENSG00000272010.1	CTD-3025N20.3	0.499725	6.01228e-05	0.0021558	Intergenic	-0.850822	Y
ENSG00000272037.1	KB-431C1.5	0.4595	0.00012417	0.00372391	Antisense	-2.58496
ENSG00000272068.1	RP11-284F21.9	-0.572411	0.00700107	0.0620612	Intergenic	-2.22021	Y
ENSG00000272088.1	RP11-168F9.2	0.455006	0.00279752	0.0342111	Intergenic	-2.81558	Y
ENSG00000272100.1	RP11-155O18.6	0.487226	0.00131648	0.0204958	Antisense	-1.5025
ENSG00000272109.1	CTD-2260A17.3	0.733908	4.47537e-05	0.00172621	Antisense	NA	Y
ENSG00000272129.1	RP11-250B2.6	-0.326206	0.000241978	0.00621081	Intergenic	-0.468382	Y
ENSG00000272140.2	RP11-574K11.29	0.243472	0.010902	0.0821843	Intergenic	-3.20525	Y
ENSG00000272145.1	NFYC-AS1	0.350201	0.00105516	0.0176767	Antisense	-1.396
ENSG00000272146.4	RP11-755B10.4	0.353148	0.00517197	0.0512726	Antisense	0.745901	Y
ENSG00000272153.1	RP1-286D6.5	0.277054	0.00317147	0.0372798	Antisense	-2.848
ENSG00000272186.1	RP11-110I1.13	0.312233	0.0098952	0.077191	Antisense	NA
ENSG00000272195.1	RP11-156E8.1	-0.467149	0.00043982	0.0096138	Antisense	-3.21403
ENSG00000272217.1	XXbac-BPG157A10.21	0.436983	0.00296866	0.0355384	Intergenic	-2.7668	Y
ENSG00000272221.1	XXbac-BPG181B23.7	-0.442161	0.000531078	0.0110078	Intergenic	-0.147395	Y
ENSG00000272240.1	RP5-855D21.1	0.379583	0.00226246	0.0296659	Antisense	NA	Y
ENSG00000272243.4	RP11-554D15.3	0.664653	0.00950172	0.0751392	Intergenic	NA	N
ENSG00000272277.1	RP1-40E16.12	0.498543	0.000288077	0.00708451	Antisense	0.138475
ENSG00000272279.1	RP11-157J24.2	-0.491169	0.00585809	0.0555581	Intergenic	1.13473	Y
ENSG00000272282.1	RP11-222K16.2	0.413394	0.00936471	0.0745533	Intergenic	1.09151	Y
ENSG00000272293.1	RP11-91J19.3	0.417844	0.000176617	0.00490939	Antisense	0.179952
ENSG00000272367.1	CTC-428H11.2	0.529631	6.04666e-05	0.00216066	Antisense	-3.91068
ENSG00000272382.1	CTD-2035E11.4	0.581884	9.14047e-05	0.00295167	Intergenic	-3.35464	Y
ENSG00000272402.1	RP1-30M3.6	0.2828	0.000311533	0.00752246	Antisense	NA	Y
ENSG00000272411.1	RP11-44B19.1	0.541929	0.000478619	0.0102452	Antisense	NA	Y
ENSG00000272425.1	RP11-363E6.4	0.595345	0.00135713	0.0209067	Intergenic	-2.11692	Y
ENSG00000272426.1	RP11-108M9.6	0.545024	0.00603859	0.0566963	Antisense	-0.857981	Y
ENSG00000272430.1	RP11-38L15.8	-0.439359	0.00126846	0.0199566	Intergenic	NA	N
ENSG00000272432.1	RP3-465N24.6	0.475252	0.000388843	0.00882494	Antisense	-0.25399	Y
ENSG00000272463.1	RP11-532F6.3	-0.427904	0.000835822	0.0150065	Intergenic	0.0968308	Y
ENSG00000272472.1	RP11-95G17.2	0.695139	0.00101308	0.0172005	Intronic	-2.31589	Y
ENSG00000272482.1	RP11-474O21.5	-0.489106	0.000671758	0.0129182	Intergenic	0.0874785	Y
ENSG00000272486.1	RP11-532M24.1	0.79503	1.9701e-13	6.84558e-11	Antisense	-0.266147
ENSG00000272502.1	RP11-713M15.2	0.73707	9.378e-05	0.00300955	Antisense	0.517397
ENSG00000272508.1	RP11-96C23.14	0.796734	2.8494e-05	0.00119886	Exonic	-0.590703	Y
ENSG00000272509.1	RP11-347C18.5	0.374597	0.000731859	0.0137014	Antisense	0
ENSG00000272511.1	RP11-180N14.1	-0.357007	0.010444	0.0800624	Intergenic	NA	Y
ENSG00000272518.1	RP11-26J3.3	0.226826	0.0116691	0.085895	Intronic	0.109941	Y
ENSG00000272519.1	RP11-105N14.2	1.05952	3.69194e-07	3.35917e-05	Intergenic	NA	Y
ENSG00000272525.1	RP11-79P5.9	0.332377	0.0127326	0.0908503	Intergenic	0.486327	Y
ENSG00000272529.1	RP11-415F23.4	0.499215	0.000187711	0.00512606	Intronic	-3.58045	Y
ENSG00000272541.1	XXbac-BPGBPG55C20.1	0.538091	0.00353172	0.0399904	Intergenic	-2.65635	Y
ENSG00000272568.4	CTB-113D17.1	0.380403	0.0138531	0.0961166	Antisense	-1	Y
ENSG00000272588.1	RP11-440L14.4	0.36059	0.00201614	0.0275977	Antisense	-1.65492	Y
ENSG00000272604.1	RP11-251G23.5	0.186049	0.012846	0.0913594	Antisense	-0.2084	Y
ENSG00000272606.1	RP11-554J4.1	0.376462	0.000246784	0.00628372	Antisense	-0.183487
ENSG00000272622.1	RP11-395N3.2	0.471082	0.0121992	0.0883881	Intergenic	-1.09183	Y
ENSG00000272630.1	RP11-344N10.5	0.555516	5.51259e-09	8.54599e-07	Intergenic	-1.97846	Y
ENSG00000272668.1	RP11-190A12.8	-0.801055	1.17465e-05	0.000593315	Antisense	-6.52817	Y
ENSG00000272677.1	RP11-127B20.3	0.445768	0.000563747	0.011395	Antisense	-0.449264	Y
ENSG00000272690.4	RP11-803B1.8	0.394895	0.00107892	0.0179629	Intergenic	-1.23725	Y
ENSG00000272692.1	RP11-399K21.14	0.674835	1.75298e-09	2.94405e-07	Intergenic	-3.05015	Y
ENSG00000272702.1	RP11-44N22.3	0.424631	0.00693264	0.061778	Antisense	0.545611	Y
ENSG00000272720.1	CTA-228A9.3	0.467018	0.00202589	0.0276337	Antisense	-4.29218	Y
ENSG00000272732.1	RP5-1159O4.2	0.410354	0.00762881	0.0655778	Intergenic	-1.3984	Y
ENSG00000272733.1	KB-208E9.1	0.42803	0.00685315	0.0612619	Intergenic	-2.70913	Y
ENSG00000272734.1	ADIRF-AS1	0.413698	0.0060926	0.0570772	Exonic	-2.19607	Y
ENSG00000272746.1	RP11-53B2.6	-0.586104	0.000383782	0.00872975	Intronic	NA	Y
ENSG00000272750.1	RP11-378J18.8	0.24814	0.00440072	0.0463012	Antisense	-0.776649
ENSG00000272755.1	RP11-326G21.1	-0.62044	0.00301699	0.0359568	Intergenic	0.246042	Y
ENSG00000272783.1	RP13-1016M1.2	-0.507574	0.0135665	0.0947671	Intergenic	NA	Y
ENSG00000272787.1	KB-226F1.2	0.672503	2.70247e-06	0.000180345	Intronic	-3.26076	Y
ENSG00000272795.1	RP11-602N24.3	0.45701	0.00217861	0.0289717	Intergenic	-0.874776	Y
ENSG00000272798.1	CTA-390C10.9	-0.921295	4.2275e-05	0.00165596	Intergenic	NA	Y
ENSG00000272799.1	RP11-474N24.6	0.519859	0.000130965	0.00388148	Intergenic	-2.33455	Y
ENSG00000272808.2	RP11-66B24.7	1.03837	8.56183e-15	3.52145e-12	Intergenic	-1.40571	Y
ENSG00000272823.1	RP11-295M18.6	0.481131	0.00190427	0.0265039	Intergenic	NA	Y
ENSG00000272824.1	RP6-74O6.6	1.43626	1.25349e-20	9.7162e-18	Intergenic	NA	Y
ENSG00000272825.1	LL21NC02-1C16.2	0.333456	0.00350414	0.0398087	Intergenic	-3.28562	Y
ENSG00000272827.1	RP11-445P19.3	1.14373	1.65145e-06	0.000119506	Intergenic	-3.33809	Y
ENSG00000272829.1	XXbac-B135H6.18	0.406009	0.000578836	0.0116018	Antisense	0.963915	Y
ENSG00000272834.1	RP5-1042K10.13	0.89607	1.09942e-09	1.93512e-07	Antisense	NA	Y
ENSG00000272836.1	RP3-402G11.27	0.269285	0.00950632	0.0751392	Antisense	-2.8635	Y
ENSG00000272843.1	RP11-313P13.5	0.40338	0.00886448	0.0721382	Antisense	-0.776589
ENSG00000272853.1	RP11-398C13.6	0.364888	0.00170804	0.0245528	Intergenic	-0.156045	Y
ENSG00000272854.1	RP4-593H12.1	0.504429	0.000292581	0.00717053	Antisense	-1.94268
ENSG00000272861.1	RP11-332H14.1	-0.324362	0.00428706	0.0454972	Intergenic	NA	Y
ENSG00000272864.1	RP11-17E13.2	0.390469	0.0143587	0.0982791	Intergenic	-2.33997	Y
ENSG00000272871.1	RP11-408A13.4	0.354084	0.0060535	0.0567834	Intergenic	-3.25264	Y
ENSG00000272888.4	LINC01578	0.234062	0.000871684	0.0154507	Exonic	0.444457
ENSG00000272894.4	RP5-1159O4.1	0.585794	9.14664e-05	0.00295167	Antisense	-2.12747	Y
ENSG00000272899.2	RP11-309L24.4	0.436337	0.00012396	0.00372037	Antisense	-1.38543
ENSG00000272906.1	RP11-533E19.7	0.39913	0.00442801	0.0465154	Antisense	-1.0851
ENSG00000272911.1	RP11-74E22.6	0.579029	0.00119805	0.0192697	Intergenic	NA	Y
ENSG00000272931.1	RP5-943J3.2	0.352234	0.00306491	0.0363601	Antisense	-0.502493	Y
ENSG00000272941.1	RP11-134L10.1	0.432266	0.000244743	0.00625149	Antisense	-1.04267
ENSG00000272942.1	CTA-246H3.12	-0.759671	0.000465799	0.0100724	Intergenic	-1.28951	Y
ENSG00000272949.1	RP11-514P8.8	0.847418	7.34975e-05	0.00250208	Exonic	-2.86613	Y
ENSG00000272977.1	CTA-390C10.10	-0.941661	1.54395e-20	1.17419e-17	Intergenic	-2.31501	Y
ENSG00000272979.1	RP11-647K16.1	0.389038	0.00208225	0.0281171	Antisense	0.467934	Y
ENSG00000272994.1	RP11-332H14.2	0.266821	0.00574076	0.0547675	Antisense	-1.87437
ENSG00000273004.1	GS1-279B7.2	-0.325641	0.00854306	0.0705703	Intergenic	-1.36327	Y
ENSG00000273009.1	RP11-352G9.1	0.656356	7.23698e-05	0.00247624	Intergenic	-2.58898	Y
ENSG00000273010.1	RP11-96K19.5	0.344659	0.00252133	0.0320388	Antisense	-0.177029
ENSG00000273013.1	CTD-2002J20.1	0.422791	0.00162727	0.0237772	Antisense	NA
ENSG00000273014.1	RP11-225B17.2	-0.240862	0.0091872	0.0737373	Intergenic	0.758529	Y
ENSG00000273036.2	FAM95C	0.379291	0.00743271	0.0644427	Exonic	-3.88618
ENSG00000273038.2	RP11-479G22.8	-0.26474	0.00262211	0.032833	Intergenic	-1.99137	Y
ENSG00000273055.1	CTB-13F3.1	0.449825	0.000245098	0.00625263	Antisense	-3.55396
ENSG00000273056.1	RP11-77E14.2	0.546107	0.00202108	0.0276231	Intergenic	-3.33196	Y
ENSG00000273058.2	RP11-385F5.5	0.403159	7.5182e-05	0.00254926	Antisense	-2.22729	Y
ENSG00000273062.1	RP11-428K3.1	0.399352	0.00653098	0.0595845	Antisense	-0.999031
ENSG00000273073.1	RP11-109E12.1	0.913175	2.24727e-07	2.20391e-05	Intergenic	-1.21833	Y
ENSG00000273076.1	RP3-508I15.22	0.511154	0.000166449	0.00467856	Antisense	NA	Y
ENSG00000273096.1	RP3-508I15.20	0.388839	0.00486305	0.04925	Antisense	NA	Y
ENSG00000273137.1	RP3-402G11.28	0.367742	0.00066914	0.0128801	Antisense	-3.2967	Y
ENSG00000273139.1	XXbac-B444P24.14	0.481846	0.00110675	0.0182752	Intergenic	-0.45587	Y
ENSG00000273148.1	RP5-1068E13.7	0.297417	0.00966439	0.075949	Intergenic	-1.87797	Y
ENSG00000273151.1	RP11-449P15.2	0.433999	0.00294901	0.0353803	Antisense	-2.23474
ENSG00000273179.1	RP11-20I20.4	0.599182	0.0038837	0.0427005	Antisense	NA	Y
ENSG00000273183.1	RP11-5C23.2	0.318423	0.00161488	0.0236564	Antisense	-3.49508	Y
ENSG00000273186.1	RP11-339B21.10	0.491456	0.000557366	0.0113235	Intronic	-0.498473	Y
ENSG00000273243.1	CTA-217C2.2	1.13586	9.12926e-20	6.57095e-17	Intergenic	-1.81063	Y
ENSG00000273249.1	LL09NC01-251B2.3	0.364914	0.00508061	0.0506014	Antisense	-0.142922	Y
ENSG00000273287.2	CTA-268H5.14	0.448481	0.003571	0.0402957	Intergenic	-2.12098	Y
ENSG00000273306.1	RP11-527J8.1	0.424158	4.31509e-06	0.000263528	Antisense	-2.63091	Y
ENSG00000273319.1	RP11-138A9.2	0.48685	0.00201514	0.0275977	Intergenic	-0.959191	Y
ENSG00000273328.4	RP11-141M3.6	1.3493	2.23045e-13	7.61888e-11	Exonic	-1.33447
ENSG00000273329.1	RP11-448A19.1	0.270113	0.00169583	0.0244383	Intergenic	-2.36936	Y
ENSG00000273333.2	XXbac-BPG300A18.13	0.549814	0.000513089	0.010752	Exonic	NA
ENSG00000273335.1	RP11-61L19.2	-0.780659	0.000686918	0.0131221	Intergenic	0.105454	Y
ENSG00000273341.1	RP5-899E9.1	0.587577	6.89238e-05	0.0023826	Intergenic	NA	Y
ENSG00000273344.1	PAXIP1-AS1	0.217855	0.0034598	0.0395054	Intergenic	-0.536856	Y
ENSG00000273345.4	CTD-2410N18.4	0.414474	0.00892954	0.0723754	Exonic	-0.654753
ENSG00000273356.1	RP11-804H8.6	0.259042	0.0089345	0.0723873	Intergenic	-2.11395	Y
ENSG00000273381.1	RP11-305L7.7	0.466885	0.000200582	0.0053899	Intergenic	-3.32687	Y
ENSG00000273384.1	RP5-1098D14.1	0.71239	0.000290232	0.00713315	Intergenic	1.3023	Y
ENSG00000273387.1	RP3-412A9.16	-0.370931	0.00272952	0.0336655	Antisense	-1.23732
ENSG00000273389.1	RP13-514E23.2	0.703955	0.000411242	0.00917452	Antisense	NA
ENSG00000273391.1	RP11-634H22.1	0.470284	0.000116412	0.00355568	Antisense	0.462836
ENSG00000273402.1	RP5-855D21.2	0.369254	0.0089202	0.0723433	Intronic	-3.61835	Y
ENSG00000273419.1	RP4-751H13.7	0.458998	0.000387954	0.00880972	Antisense	-2.02788
ENSG00000273447.1	AC004067.5	0.273857	0.0147408	0.0998585	Antisense	-0.264078	Y
ENSG00000273448.1	RP11-166O4.6	0.597744	5.98893e-07	5.07134e-05	Intergenic	-2.63041	Y
ENSG00000273449.1	RP11-218F10.3	0.341239	0.0131796	0.0929031	Antisense	-4.34224	Y
ENSG00000273450.1	RP11-76P2.4	0.639569	1.29877e-05	0.000641537	Antisense	-2.2406
ENSG00000273478.1	RP11-465N4.5	0.224708	0.0135707	0.0947671	Antisense	-0.374352
ENSG00000273485.1	RP11-225H22.7	0.676014	0.000594409	0.0118047	Antisense	-2.3136
ENSG00000273489.1	RP11-180C16.1	0.485589	0.000156073	0.00443329	Antisense	-1.47285
ENSG00000273557.1	CTD-2024I7.18	-0.336417	0.0137177	0.0954791	Intronic	NA
ENSG00000273558.1	RP11-244H18.3	0.94886	0.00019818	0.00534317	Intergenic	-4.48339	Y
ENSG00000273615.1	RP11-1136G4.2	-0.677223	0.00168426	0.0243474	Intergenic	-0.360594
ENSG00000273619.1	RP5-908M14.9	0.341001	0.00964795	0.0759087	Intergenic	-0.348829
ENSG00000273687.1	RP5-837J1.6	0.602945	2.65664e-05	0.00114281	Antisense	NA
ENSG00000273760.1	CH17-360D5.3	1.54891	5.91707e-14	2.22897e-11	Intergenic	-0.271225
ENSG00000273816.1	RP11-85B7.5	0.57531	0.00213749	0.0285379	Intergenic	NA
ENSG00000273840.1	AL078471.5	0.552053	0.000971343	0.0166604	Exonic	-2.00719
ENSG00000273890.1	RP11-603J24.21	0.502798	0.000636395	0.0124279	Antisense	NA
ENSG00000273891.1	RP11-500G22.5	0.381271	3.76049e-05	0.00151726	Antisense	-1
ENSG00000273951.1	RP4-620E11.8	0.252765	0.0084518	0.0701046	Intronic	-1.79237
ENSG00000273980.1	RP13-49I15.6	0.548263	0.000604679	0.011963	Intergenic	NA
ENSG00000273989.1	RP11-425D17.2	0.45666	0.00405654	0.043918	Intronic	NA
ENSG00000274080.1	CTA-315H11.2	0.480703	0.0109964	0.0826613	Intronic	-3.59953
ENSG00000274272.1	RP11-44M6.7	0.351858	0.00163554	0.0238631	Exonic	-3.48923
ENSG00000274297.1	RP11-138H8.8	0.412284	0.00744456	0.0644891	Intronic	-3.55791
ENSG00000274312.1	RP11-167B3.2	-0.565896	0.0100924	0.0781756	Intergenic	NA
ENSG00000274363.1	RP11-104O19.4	0.486827	0.00257491	0.0325027	Intergenic	0.613255
ENSG00000274373.1	RP13-714J12.1	0.678699	0.00040343	0.00906918	Intergenic	-3.05301
ENSG00000274386.3	RP5-994D16.11	0.605121	3.38301e-05	0.00139426	Exonic	-1.60132
ENSG00000274421.1	RP11-386J22.3	0.520701	0.00812721	0.0684319	Intronic	-1.76178
ENSG00000274578.1	RP11-430E17.1	0.668775	0.00897702	0.072658	Intronic	-1.61877
ENSG00000274598.1	RP11-423G4.10	0.781465	0.000507706	0.0106751	Intronic	-0.946542
ENSG00000274653.1	RP11-347C12.11	0.226627	0.0116774	0.085928	Antisense	-0.919903
ENSG00000274719.1	RP11-86K22.2	-0.506797	0.00570807	0.0546108	Intronic	NA
ENSG00000274767.1	AC131056.3	1.51088	1.51272e-16	7.71815e-14	Antisense	0.80735	Y
ENSG00000274898.1	AC001226.7	0.530535	0.000562643	0.0113905	Intergenic	-0.862496
ENSG00000274949.1	RP5-1009E24.9	-0.54855	0.00594713	0.0561121	Exonic	-0.540568
ENSG00000274987.1	RP11-295I5.3	0.287674	0.00252531	0.0320692	Antisense	-2.38769
ENSG00000275005.1	RP11-234G16.5	0.650024	0.000202233	0.00542342	Antisense	NA
ENSG00000275056.1	RP11-127I20.8	0.424824	0.00456652	0.0474503	Intronic	-2.31289
ENSG00000275147.1	RP11-324D17.3	-0.771328	0.00206871	0.0280093	Intergenic	NA
ENSG00000275180.1	RP11-631N16.4	0.372563	0.0113227	0.08432	Intergenic	-2.42751
ENSG00000275212.1	RP3-446N13.5	0.76117	0.00106763	0.017807	Intergenic	NA
ENSG00000275248.1	RP11-40E6.2	0.781433	0.000469841	0.0101272	Intergenic	NA
ENSG00000275401.1	RP4-564F22.7	0.653488	2.83285e-05	0.00119439	Intergenic	-3.62993
ENSG00000275413.1	CTC-529I10.1	0.399855	0.00285372	0.0346592	Antisense	-1.60281
ENSG00000275418.1	RP11-126O1.6	0.707363	0.00362918	0.0407696	Intergenic	NA
ENSG00000275437.1	RP5-908M14.10	0.341681	0.00512718	0.0509806	Intronic	-3.33587
ENSG00000275441.1	RP11-666O2.2	0.42235	0.00157364	0.0232616	Antisense	-1.1007
ENSG00000275450.1	RP11-4L24.3	-0.582788	0.00325675	0.0380548	Intergenic	-0.672936
ENSG00000275454.1	CTD-2026K11.4	0.255773	0.00233541	0.0303205	Antisense	-1.02752
ENSG00000275476.1	RP11-996F15.4	0.981346	9.2868e-11	2.06808e-08	Antisense	-3.32807
ENSG00000275491.1	RP5-1009E24.8	-0.526381	0.00807414	0.0680846	Intergenic	-3.61733
ENSG00000275494.1	RP11-266L9.8	0.606145	4.02988e-06	0.000248367	Intergenic	1.24711
ENSG00000275532.1	CTB-58E17.3	0.239439	0.00593298	0.0559917	Antisense	-1.24101	Y
ENSG00000275576.1	RP5-836N17.4	0.530724	0.00137465	0.0210783	Intronic	-2.07473
ENSG00000275601.1	AC011330.13	-0.370292	0.00144201	0.0218389	Intronic	-1.17045
ENSG00000275632.1	RP5-967N21.11	0.274695	0.0136445	0.0951342	Intergenic	-1.91398
ENSG00000275741.1	RP11-40E6.1	0.639822	0.00324061	0.0379597	Antisense	NA
ENSG00000275888.1	RP13-516M14.10	0.487469	0.000334008	0.00791933	Antisense	-3.72583
ENSG00000275897.1	RP11-94C24.13	0.36316	0.00657407	0.0597208	Intergenic	-4.23503
ENSG00000275936.1	RP1-278C19.8	0.500011	0.00562734	0.0542116	Antisense	-3.0742
ENSG00000276075.1	CTD-2012K14.8	0.438455	0.000992836	0.0169425	Antisense	0.133282
ENSG00000276121.1	CTD-2008A1.3	0.596742	0.00745112	0.0645182	Intergenic	NA
ENSG00000276128.1	RP11-459O16.8	1.03649	2.30182e-05	0.0010246	Intergenic	-2.58496
ENSG00000276148.1	RP11-278C7.4	0.310258	0.0143028	0.0981449	Antisense	-2.05952
ENSG00000276188.1	RP11-173P15.10	0.412354	0.00230148	0.0299922	Intergenic	-1
ENSG00000276261.1	RP11-1060J15.9	0.378797	0.00178687	0.0252802	Intergenic	-1.26139
ENSG00000276272.1	RP11-121C6.5	0.858468	2.02951e-07	2.02986e-05	Intergenic	-2.79675
ENSG00000276308.1	RP11-116D17.4	0.762764	0.00157084	0.0232523	Intergenic	NA
ENSG00000276384.1	RP11-186B7.7	0.411698	0.0085264	0.0704827	Antisense	-0.909387
ENSG00000276445.1	LLNLR-268E12.1	0.442991	0.00371969	0.0414399	Intergenic	-0.635892
ENSG00000276517.1	AL133243.2	0.222751	0.00432619	0.0457199	Intronic	-2.64267
ENSG00000276533.1	RP11-139H15.5	0.654013	0.000184125	0.00505596	Intronic	-2.33614
ENSG00000276564.1	CTA-276F8.1	0.420143	0.00077149	0.0142514	Intronic	-2.54616
ENSG00000276570.1	CTD-2587H24.14	0.204945	0.00598419	0.056343	Exonic	-2.72776
ENSG00000276704.1	RP11-128N14.4	0.478601	0.00149728	0.0224227	Intronic	-2.15681
ENSG00000276742.1	RP11-500G22.4	0.50482	0.00536418	0.0525301	Antisense	NA
ENSG00000276842.1	RP11-713N11.6	0.516034	0.000401159	0.00902821	Antisense	NA
ENSG00000276855.1	CTD-3157E16.2	-0.406094	0.00025895	0.00652752	Intergenic	1.41832
ENSG00000276934.1	RP11-231E4.5	0.800365	1.99286e-08	2.65103e-06	Intronic	-1.39883
ENSG00000276957.1	RP11-29B2.6	0.507143	0.00121365	0.0194276	Intergenic	NA
ENSG00000276972.1	RP11-116D17.5	0.58305	0.00676274	0.0607148	Intergenic	NA
ENSG00000277010.1	RP11-616M22.12	-0.657923	0.000280557	0.00695474	Antisense	-2.11548
ENSG00000277022.1	RP3-453C12.15	-0.794165	5.29427e-05	0.00196204	Intergenic	-2.05247
ENSG00000277087.1	RP5-1116H23.6	0.705254	0.00136103	0.0209466	Intergenic	NA
ENSG00000277128.1	RP11-146E13.4	-0.634498	0.00857543	0.0707718	Intergenic	NA	Y
ENSG00000277135.1	RP11-327J17.9	0.464002	0.00330784	0.0384563	Intergenic	NA
ENSG00000277142.1	LINC00235	0.357546	0.00230497	0.0300183	Intergenic	-1.82051
ENSG00000277170.1	RP11-295D4.4	0.399141	0.00209482	0.0282093	Intronic	-1.39878
ENSG00000277200.1	RP11-74E22.8	-0.57368	0.00385229	0.0424478	Intergenic	-0.324371
ENSG00000277215.1	SPANXA2-OT1	-0.58449	0.00690531	0.0615779	Intronic	-0.676554	N
ENSG00000277232.2	GTSE1-AS1	-0.732067	5.59892e-11	1.31207e-08	Intergenic	-0.0989745
ENSG00000277235.1	RP4-550H1.7	0.47145	0.00531813	0.0521501	Intergenic	NA
ENSG00000277245.1	RP11-48G14.3	0.533143	3.79277e-05	0.0015257	Antisense	0.106915
ENSG00000277299.1	RP11-837J7.4	0.447745	0.00431475	0.0456589	Antisense	NA
ENSG00000277382.1	RP11-318A15.8	0.777575	0.000358187	0.00832234	Antisense	NA
ENSG00000277383.1	CTD-3001H11.2	0.397365	0.0121061	0.087894	Antisense	-1.81015
ENSG00000277425.1	RP5-1116H23.3	0.444118	0.00184117	0.0258219	Intergenic	-0.207519
ENSG00000277449.1	CEBPB-AS1	0.261325	0.00170641	0.0245469	Antisense	-0.888326
ENSG00000277511.1	CTD-2095E4.5	0.46445	0.000375099	0.00858553	Intergenic	-0.773012
ENSG00000277548.1	RP11-139H15.6	0.244017	0.0132471	0.0931995	Antisense	NA
ENSG00000277579.1	CTC-268N12.3	0.634088	0.00772634	0.0662044	Intronic	NA	N
ENSG00000277589.1	RP11-333J10.3	0.474687	0.00126898	0.0199566	Intronic	-2.42899	Y
ENSG00000277621.1	RP11-597M12.2	0.465483	0.0146988	0.0996353	Antisense	NA
ENSG00000277654.3	RP11-255M2.3	-0.951998	0.000138994	0.00407746	Intergenic	-2.71845
ENSG00000277693.1	AP003900.6	0.591966	0.00601478	0.0565386	Intergenic	0.0781573	Y
ENSG00000277728.1	RP11-143K11.7	0.311617	0.00966264	0.075949	Antisense	-2.45935
ENSG00000277778.1	PGM5P2	0.323257	0.00202251	0.0276231	Intergenic	-3.62813
ENSG00000277831.1	RP11-269C23.5	-0.489593	0.0128711	0.0914825	Intergenic	-1.14356
ENSG00000277855.1	RP11-154H23.4	-0.855916	5.17418e-05	0.00193011	Antisense	0.710493
ENSG00000277938.1	RP5-965G21.3	0.796005	1.25681e-17	7.03585e-15	Intergenic	-2.06056
ENSG00000278000.1	AC139100.4	0.392707	0.0108445	0.0819771	Antisense	-3.16428
ENSG00000278022.1	RP11-35O15.2	0.505872	0.00707673	0.0624162	Intronic	-4.64931
ENSG00000278090.1	RP11-6O2.2	0.570002	7.812e-05	0.00263056	Intergenic	-2.68732
ENSG00000278095.1	RP11-283G6.6	0.778703	0.000998354	0.0169863	Antisense	NA
ENSG00000278126.1	RP11-454E5.4	0.381812	5.61725e-07	4.8071e-05	Intronic	-0.0498108
ENSG00000278175.2	GLIDR	-0.208524	0.0107269	0.0814526	Intergenic	0.127222
ENSG00000278185.1	RP11-153F5.7	0.381622	0.00138786	0.0212218	Intronic	NA
ENSG00000278231.1	RP5-906C1.1	0.403797	0.0133858	0.0938493	Intronic	0.762391
ENSG00000278238.1	RP11-245D16.4	0.380603	0.00293091	0.0352751	Intergenic	0.488604
ENSG00000278239.1	AC020956.3	0.663855	0.009456	0.0749142	Intergenic	NA	N
ENSG00000278383.1	RP4-694B14.8	0.414746	4.85433e-05	0.00183549	Antisense	-1.36908
ENSG00000278472.1	RP11-74D7.3	-1.26911	1.56241e-17	8.62686e-15	Antisense	NA
ENSG00000278518.1	RP11-108K14.12	-0.566221	0.00656588	0.0597134	Antisense	NA
ENSG00000278642.1	RP11-159D12.11	0.582298	0.00461637	0.0476984	Intergenic	NA
ENSG00000278727.1	AC000403.4	-0.332088	0.00912095	0.0734567	Intergenic	1.05024
ENSG00000278730.1	RP11-147L13.11	-0.108219	0.00681863	0.0610646	Intergenic	0.239081
ENSG00000278743.1	RP11-707G18.1	0.573155	0.00051067	0.0107156	Intergenic	-1.27282
ENSG00000278765.1	RP5-890E16.5	0.282733	0.00126874	0.0199566	Intergenic	0.29839
ENSG00000278766.2	AC159540.2	-0.860534	0.000802478	0.0146154	Intergenic	NA	Y
ENSG00000278840.1	RP11-345N11.1	-0.439969	0.00592849	0.0559625	Intronic	NA
ENSG00000278867.1	RP11-640N20.4	0.4426	1.22342e-05	0.000612579	Intronic	-3.0803
ENSG00000278875.1	CTC-439O9.1	0.418817	0.0117553	0.0862431	Intergenic	-3.8444
ENSG00000278909.1	RP11-401P9.7	-0.65457	0.00835794	0.069604	Intronic	-3.32193
ENSG00000278912.1	CTD-2196E14.8	0.994459	6.43162e-05	0.00226015	Intronic	-1.8365
ENSG00000278932.2	bP-21264C1.2	0.589866	1.29705e-05	0.000641474	Intergenic	-0.407679
ENSG00000278949.1	RP11-46H11.11	0.325718	0.010865	0.0820415	Intronic	-4.38377
ENSG00000278958.1	RP11-313L6.2	0.859794	0.000209133	0.00556038	Intergenic	-2
ENSG00000278965.1	RP11-39H3.2	0.496496	0.00718064	0.0630155	Intergenic	0.0703893
ENSG00000278967.1	RP5-849H19.3	0.647892	0.00585113	0.0555183	Antisense	NA
ENSG00000278983.1	RP11-426J5.3	-1.24285	4.91242e-11	1.15792e-08	Intronic	-3.16992
ENSG00000278999.1	AC008985.1	0.503049	0.00252768	0.0320891	Antisense	NA
ENSG00000279078.1	SND1-IT1	0.575941	0.00255484	0.0323423	Exonic	-5.72646
ENSG00000279110.1	CTA-243E7.1	0.341967	0.00938373	0.0746163	Antisense	NA
ENSG00000279121.1	RP11-83B20.5	0.693158	0.00332465	0.0385631	Antisense	NA
ENSG00000279127.1	RP3-442L6.4	0.869219	0.000558864	0.0113425	Intergenic	-1.51937
ENSG00000279141.2	LINC01451	0.583573	0.00173784	0.0248306	Intergenic	-3.48417
ENSG00000279145.1	RP11-547D13.1	-0.37177	0.00280659	0.0342803	Intergenic	-1.54431
ENSG00000279170.1	RP1-199J3.6	0.359067	0.00919894	0.0738021	Intergenic	-0.148798
ENSG00000279174.1	RP11-1099M24.9	0.560245	0.000889187	0.0156153	Antisense	0
ENSG00000279182.1	XX-C00717C00720L.1	0.502541	0.0016802	0.0242998	Antisense	-1.91886
ENSG00000279196.1	RP11-1072A3.3	0.807402	3.90826e-12	1.16756e-09	Antisense	-3.86454
ENSG00000279200.1	RP11-524F11.3	0.525012	0.00188487	0.0263158	Intergenic	-0.415038
ENSG00000279220.1	GPR1-AS	1.20513	2.27161e-06	0.000157053	Antisense	-1.32193
ENSG00000279227.1	AC009303.2	-0.310538	0.00314608	0.037057	Intergenic	1.12607
ENSG00000279249.1	RP11-491F9.3	0.636275	0.0124948	0.0898462	Intergenic	NA
ENSG00000279265.1	AC000123.3	0.277939	0.00340213	0.0390571	Intronic	-2.20587
ENSG00000279267.1	RP11-395L14.18	-0.556579	2.32005e-06	0.000159309	Intergenic	0.23274
ENSG00000279281.1	RP11-226M10.3	1.35634	5.62983e-10	1.04092e-07	Intronic	-4.46028
ENSG00000279283.1	RP11-417L19.5	0.543318	0.000170227	0.00475822	Intronic	-5.02603
ENSG00000279296.1	RP11-609D21.3	0.56205	0.00604816	0.0567598	Antisense	NA
ENSG00000279311.1	RP11-170K4.2	-0.395133	0.00639169	0.0589138	Intergenic	-2.08496
ENSG00000279312.1	RP3-331H24.7	0.451088	0.00104494	0.0175354	Intergenic	-5.38194
ENSG00000279322.1	RP4-738P15.6	0.319976	0.00575052	0.0548088	Antisense	NA
ENSG00000279325.1	RP11-24H2.3	-0.797786	0.00181338	0.0255656	Intergenic	NA
ENSG00000279331.1	RBM12B-AS1	0.332956	0.00830793	0.0693167	Antisense	-0.406851
ENSG00000279345.1	RP3-522J7.7	0.479312	0.00103282	0.0174037	Antisense	NA
ENSG00000279347.1	RP11-85I17.2	0.45115	0.00783168	0.0667246	Intronic	-2.76793
ENSG00000279375.1	CH17-140K24.6	-0.488711	0.0072588	0.063494	Antisense	NA
ENSG00000279398.1	RP3-429G5.5	-0.622395	0.00855725	0.0706508	Intronic	NA
ENSG00000279418.1	LINC00244	-0.921303	7.74633e-06	0.000425383	Intergenic	NA
ENSG00000279432.1	RP11-135N5.3	0.457164	0.000891276	0.0156165	Intronic	-2.80515
ENSG00000279433.1	RP11-4B16.1	0.625505	0.000259802	0.00654491	Intronic	-4.53398
ENSG00000279434.1	RP11-85K15.3	0.19803	0.00719114	0.0630802	Antisense	-2.55229
ENSG00000279481.1	RP11-181K12.1	0.656907	0.000197179	0.00532331	Intronic	-4.19286
ENSG00000279516.1	FAM230C	0.867208	4.11871e-05	0.00162417	Antisense	-1.20429
ENSG00000279518.1	AC083843.4	0.626518	4.15339e-05	0.00163487	Intergenic	-4.3524
ENSG00000279529.1	CTD-3222D19.8	0.272431	0.0113428	0.0843586	Antisense	-2.05534
ENSG00000279579.2	bP-2189O9.3	1.14529	9.57888e-07	7.49701e-05	Intergenic	-5.13549
ENSG00000279582.1	SC22CB-109E1.1	0.585864	0.0021257	0.0284747	Intergenic	NA
ENSG00000279605.1	RP11-661A12.8	0.383156	0.0056347	0.0542565	Antisense	-1.73697
ENSG00000279608.1	RP11-182N22.9	0.391397	0.00563676	0.0542587	Antisense	-2.44278
ENSG00000279622.1	RP11-254F19.4	-0.444234	0.00843257	0.0700519	Antisense	-1.16992
ENSG00000279637.1	RP11-196B3.1	0.774221	0.000869693	0.015429	Intronic	-3.06343
ENSG00000279656.1	RP11-298I3.6	-1.41566	1.29081e-19	9.12782e-17	Intronic	-2.00996
ENSG00000279667.1	RP11-656D10.7	0.393746	0.00320543	0.0376242	Intergenic	-0.58675
ENSG00000279679.1	RP11-278J6.5	0.74581	0.00314324	0.0370344	Intronic	NA
ENSG00000279689.1	RP11-574K11.32	0.195999	0.01142	0.0847088	Antisense	-1.04432
ENSG00000279692.1	RP11-1055B8.1	0.877789	5.15972e-07	4.47253e-05	Antisense	0.199765
ENSG00000279699.1	RP1-102K2.9	0.679751	6.4115e-07	5.36159e-05	Intergenic	-2.99201
ENSG00000279748.1	CTD-3222D19.9	0.417934	0.00110126	0.0182069	Antisense	-1.15384
ENSG00000279762.2	RP11-227G15.12	0.452567	0.00240839	0.0309945	Antisense	NA
ENSG00000279766.1	RP11-642A1.2	0.472098	0.00202863	0.0276617	Exonic	-1.52119
ENSG00000279770.1	LINC00552	0.782453	0.000554353	0.0112793	Intergenic	-2.33148
ENSG00000279771.1	AP000997.3	0.66334	0.00229416	0.0299261	Intergenic	NA
ENSG00000279778.1	RP11-60A14.1	1.30956	5.26271e-10	1.00058e-07	Intergenic	-1.14552
ENSG00000279786.1	CTD-2014D20.1	-0.512621	0.00695567	0.0618367	Intronic	-4.13922
ENSG00000279789.1	CTD-2574D22.3	0.348505	0.0049812	0.0500192	Intronic	-3.87304
ENSG00000279807.1	CTC-510F12.3	0.397115	0.0082057	0.0687872	Antisense	NA
ENSG00000279821.1	RP11-1334A24.5	0.406975	0.00378934	0.0419377	Intergenic	-3.00323
ENSG00000279827.1	RP11-886P16.10	0.718909	7.95195e-05	0.00266743	Exonic	-1.70044
ENSG00000279845.1	RP11-6L6.4	0.463234	0.00368802	0.0411933	Intronic	NA
ENSG00000279861.1	RP11-43N16.4	0.356524	0.00431622	0.0456624	Exonic	-3.63797
ENSG00000279873.2	LINC01126	0.337792	0.00792586	0.0671872	Intergenic	-3.46398
ENSG00000279880.1	RP11-855A2.2	0.378674	0.00380569	0.042107	Exonic	-4.12257
ENSG00000279900.1	RP11-113K21.6	0.379068	0.013002	0.0920879	Intergenic	-1.29564
ENSG00000279901.1	CTD-2270P14.2	0.610705	0.0013217	0.0205323	Intronic	-3.95749
ENSG00000279908.1	RP11-325I22.3	0.322368	0.00680539	0.0610087	Intergenic	-0.258436
ENSG00000279949.1	RP11-10A14.9	-0.668269	0.00887445	0.0721488	Intergenic	NA
ENSG00000279954.1	WI2-85898F10.2	0.517373	0.00373978	0.0415947	Intergenic	-4.64386
ENSG00000279976.1	RP11-243M5.4	0.629075	0.0138626	0.0961552	Intronic	NA
ENSG00000280018.2	CH507-154B10.2	-0.829947	1.04591e-05	0.000541173	Intergenic	-1.12981
ENSG00000280035.1	RP11-10J21.2	0.556157	0.00130804	0.0204148	Intronic	-4.24793
ENSG00000280042.1	RP11-71H17.8	0.510575	0.00356412	0.0402738	Intronic	-4.07793
ENSG00000280043.1	RP11-1281K21.8	0.636903	0.00990532	0.0772251	Intergenic	-5.32193
ENSG00000280067.1	CTD-2600H12.2	0.317835	0.0135818	0.0948116	Antisense	-2.7698
ENSG00000280077.1	RP11-87H9.4	0.266641	0.00649965	0.0593987	Intergenic	-2.65019
ENSG00000280081.2	MGC39584	0.72165	0.00163904	0.0238774	Intergenic	-0.847238
ENSG00000280087.1	CTB-129P6.7	0.446596	0.00630215	0.0584224	Exonic	-2.0268
ENSG00000280119.1	AC093642.1	0.636326	5.4522e-06	0.000318958	Intergenic	-3.059
ENSG00000280135.1	RP1-47M23.3	0.655216	0.000546475	0.0111723	Intergenic	-1.37851
ENSG00000280140.1	RP11-597D13.2	1.3157	1.31696e-11	3.38107e-09	Intergenic	NA
ENSG00000280143.1	AP000892.6	-0.45105	0.00272194	0.0336354	Antisense	-1.56883
ENSG00000280153.1	RP11-876N24.3	0.313681	0.00634961	0.0587004	Antisense	-2.59843
ENSG00000280162.1	RP11-314N13.9	0.637718	0.000332135	0.00788463	Antisense	-2.45943
ENSG00000280182.1	RP11-626G3.1	0.442389	0.00994247	0.0774249	Antisense	NA
ENSG00000280190.1	RP11-319G9.1	-0.706828	0.00586171	0.0555794	Intronic	-2.90689
ENSG00000280195.1	XX-FW83563B9.5	0.715754	1.21452e-13	4.33219e-11	Antisense	-0.323115
ENSG00000280207.1	RP11-423H2.4	0.466604	0.00728768	0.0636638	Intergenic	NA
ENSG00000280212.1	RP11-49K24.3	0.604258	0.000250595	0.00636065	Intronic	NA
ENSG00000280237.1	MIR4697HG	-0.370745	0.00220374	0.0291999	Intergenic	-2.02593
ENSG00000280254.1	RP11-81A22.4	0.245493	0.00756169	0.0651676	Exonic	-3.96456
ENSG00000280266.1	RP11-331D5.2	0.591041	0.00749751	0.0647997	Intergenic	0
ENSG00000280323.1	AC053503.12	-0.775237	2.5674e-05	0.00111393	Intergenic	NA
ENSG00000280339.1	RP11-736K20.4	-0.266361	0.00365771	0.0409645	Antisense	-1.017
ENSG00000280353.1	CTC-453G23.7	0.44887	0.00775726	0.0663283	Antisense	-1.96813
ENSG00000280354.1	RP11-83B20.4	0.684571	0.00480342	0.0488302	Antisense	NA
ENSG00000280370.1	CTA-342B11.3	0.448281	0.0047573	0.0484912	Intergenic	NA
ENSG00000280376.1	RP11-93O14.3	0.611761	0.00820695	0.0687872	Intronic	-2.32193
ENSG00000280383.1	CTA-941F9.10	0.439561	0.000240847	0.00619517	Exonic	-2.69185
ENSG00000280399.1	RP11-80P20.3	0.389722	0.00281082	0.0343112	Intergenic	-2.10295
ENSG00000280407.2	RP13-516M14.8	0.385616	0.0123414	0.0891156	Antisense	-3.36992
ENSG00000280413.1	KB-1674E1.1	0.445199	0.0109454	0.0824015	Intronic	NA
ENSG00000280418.1	AC007326.10	0.663631	0.00948319	0.0750518	Intergenic	NA
ENSG00000280422.1	RP11-155D18.13	-0.452792	0.00355814	0.0402294	Intergenic	-2.18613
ENSG00000280424.1	CITF22-92A6.2	0.465171	0.00791467	0.0671429	Intergenic	-3.18575
ENSG00000280429.1	AF001548.3	-0.565169	0.00250829	0.0319299	Intronic	NA
ENSG00000280432.1	AP000962.1	0.563022	0.0076837	0.0659091	Intergenic	NA
ENSG00000280486.1	LLNLR-307A6.1	0.461475	0.013404	0.093912	Antisense	NA
ENSG00000280620.1	SCAANT1	0.493554	0.00411762	0.0442466	Antisense	NA
ENSG00000280639.1	RP11-96C21.2	0.469587	0.00507381	0.0505962	Intergenic	-2.07059
ENSG00000280660.1	RP11-437J2.3	0.876178	0.000125908	0.00375367	Intronic	NA
ENSG00000280758.1	RP11-216B9.9	0.484858	0.00011243	0.00346197	Antisense	NA
ENSG00000280777.1	HYMAI	0.508867	0.0011832	0.0191224	Exonic	NA
ENSG00000280798.1	LINC00294	-0.169527	0.0116875	0.0859291	Antisense	-0.145501
ENSG00000280927.1	CTBP1-AS	0.645662	0.000118931	0.0036152	Antisense	NA
ENSG00000281026.1	N4BP2L2-IT2	0.308288	0.00588594	0.0557174	Intronic	-4.34454
ENSG00000281091.1	RP13-349O20.2	-0.627434	0.000217982	0.00575013	Intergenic	-1.28757
ENSG00000281103.1	TRG-AS1	0.600736	0.00258296	0.0325145	Intergenic	1.06966
ENSG00000281162.1	LINC01127	-0.479467	0.0144985	0.0987646	Intergenic	-1.58779
ENSG00000281207.1	SLFNL1-AS1	0.304462	0.00528376	0.0519572	Antisense	-5.19968
ENSG00000281332.1	LINC00997	-0.241079	0.00654972	0.0596497	Intergenic	-0.910546
ENSG00000281491.1	DNAJB5-AS1	0.574932	0.00347733	0.0395934	Intergenic	-2.26309
ENSG00000281796.1	EHMT1-IT1	0.51566	0.00177377	0.0251531	Intronic	-4.76669
ENSG00000281912.1	LINC01144	0.252558	0.0126631	0.0905295	Antisense	-1.07577
